# Supplementary material
Source: PubMed Central journal article supplement (PMC11484494)
Supplement: supplementarydata_20231220_1151cst_bhae044.pdf [file supplementarydata_20231220_1151cst_bhae044.pdf]

# Supplementary Data for “Quantitative Proteomics of Dorsolateral Prefrontal Cortex Reveals an Early Pattern of Synaptic Dysmaturation in Children with Idiopathic Autism”

S. Hossein Fatemi, Arthur Eschenlauer, Justin Aman, Timothy Folsom, and Thierry Chekouo

## List of Figures

|     |                                                                                                      |    |
|-----|------------------------------------------------------------------------------------------------------|----|
| S1  | GSEA enrichment of Reactome pathways for proteins ranked by log <sub>2</sub> (fold-change) . . . . . | 2  |
| S2  | GSEA enrichment of WikiPathways for proteins ranked by log <sub>2</sub> (fold-change) . . . . .      | 3  |
| S3  | GSEA enrichment of Reactome pathways for proteins ranked by VIP4p . . . . .                          | 4  |
| S4  | Heatmap 1 of Reactome pathways for children, log <sub>2</sub> (FC)-ranked proteins . . . . .         | 5  |
| S5  | Heatmap 2 of Reactome pathways for children, log <sub>2</sub> (FC)-ranked proteins . . . . .         | 6  |
| S6  | Heatmap 1 of Reactome pathways for adults, log <sub>2</sub> (FC)-ranked proteins . . . . .           | 7  |
| S7  | Heatmap 2 of Reactome pathways for adults, log <sub>2</sub> (FC)-ranked proteins . . . . .           | 8  |
| S8  | Heatmap 1 of WikiPathways for children, log <sub>2</sub> (FC)-ranked proteins . . . . .              | 9  |
| S9  | Heatmap 2 of WikiPathways for children, log <sub>2</sub> (FC)-ranked proteins . . . . .              | 10 |
| S10 | Heatmap 1 of WikiPathways for adults, log <sub>2</sub> (FC)-ranked proteins . . . . .                | 11 |
| S11 | Heatmap 2 of WikiPathways for adults, log <sub>2</sub> (FC)-ranked proteins . . . . .                | 12 |

## List of Tables

|     |                                                                                                                      |    |
|-----|----------------------------------------------------------------------------------------------------------------------|----|
| S1  | Significant differentially expressed proteins from children . . . . .                                                | 13 |
| S2  | Significant differentially expressed proteins from adults . . . . .                                                  | 33 |
| S3  | Significantly enriched Reactome pathways for proteins ranked by log <sub>2</sub> (fold-change) in children . . . . . | 39 |
| S4  | Significantly enriched Reactome pathways for proteins ranked by log <sub>2</sub> (fold-change) in adults . . . . .   | 42 |
| S5  | Significantly enriched WikiPathways for proteins ranked by log <sub>2</sub> (fold-change) in children . . . . .      | 47 |
| S6  | Significantly enriched WikiPathways for proteins ranked by log <sub>2</sub> (fold-change) in adults . . . . .        | 48 |
| S7  | Significantly enriched Reactome pathways for proteins ranked by VIP4p in children . . . . .                          | 49 |
| S8  | Significantly enriched Reactome pathways for proteins ranked by VIP4p in adults . . . . .                            | 51 |
| S9  | Significantly enriched WikiPathways for proteins ranked by VIP4p in children . . . . .                               | 57 |
| S10 | Significantly enriched WikiPathways for proteins ranked by VIP4p in adults . . . . .                                 | 58 |

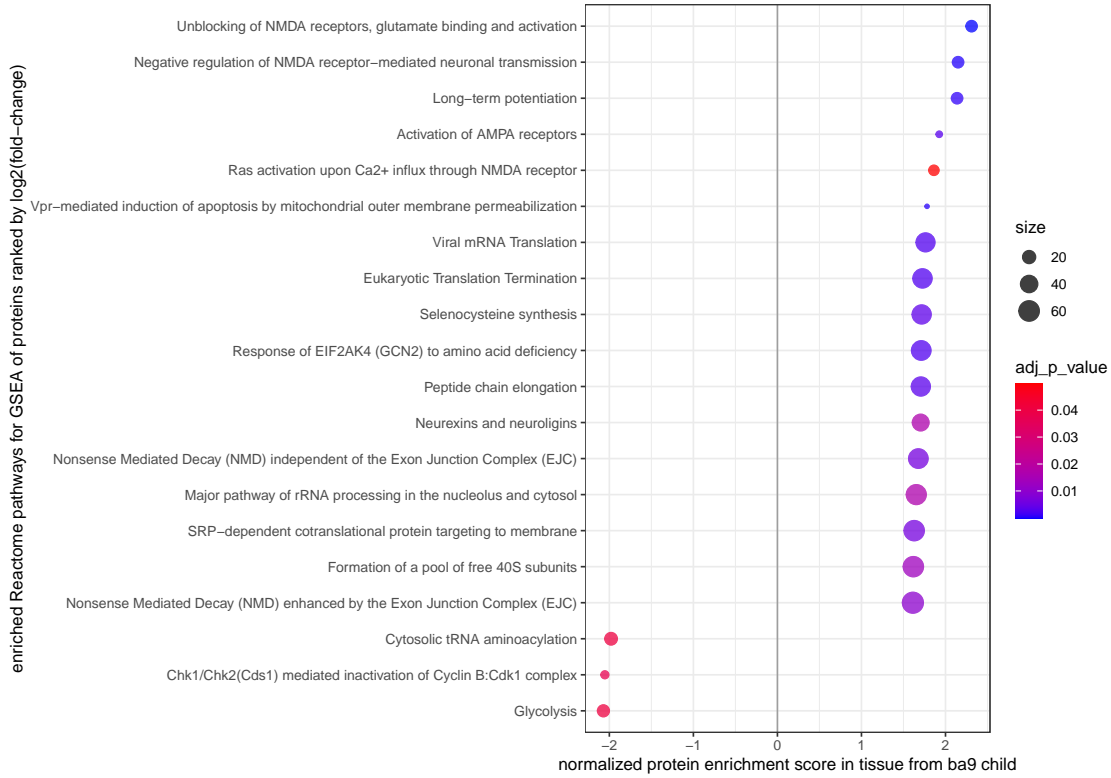

(a) Child Reactome

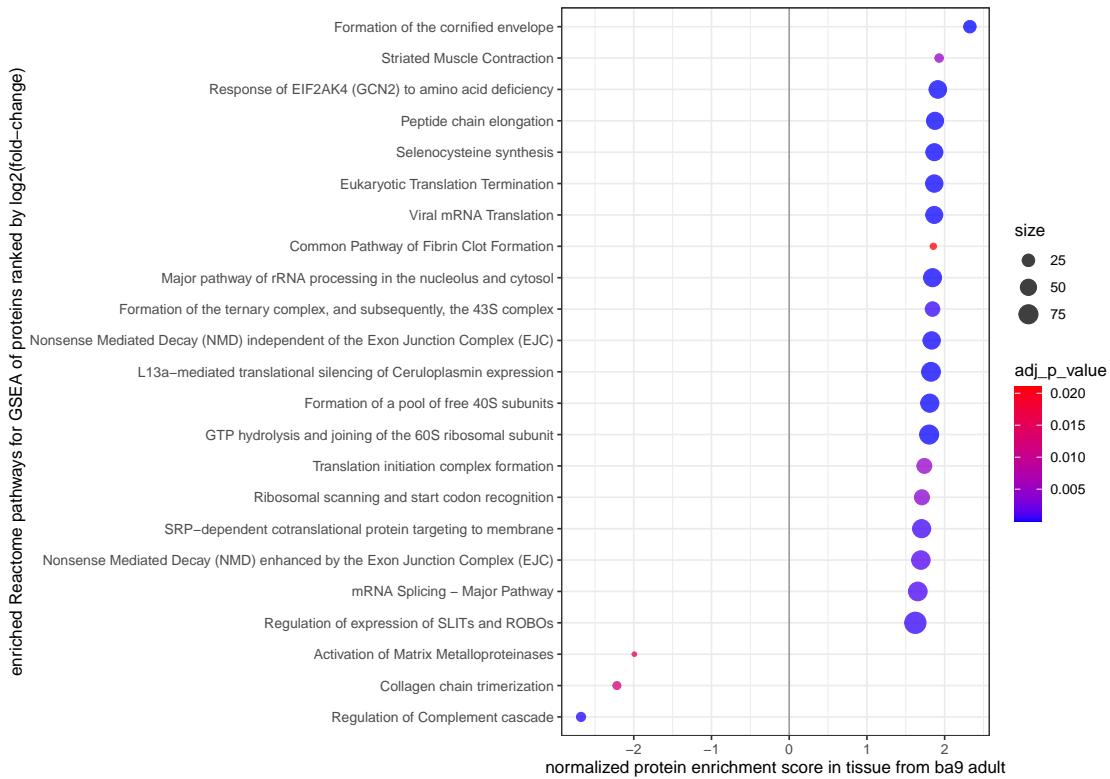

(b) Adult Reactome

Figure S1: GSEA enrichment of Reactome pathways for proteins ranked by  $\log_2(\text{fold-change})$

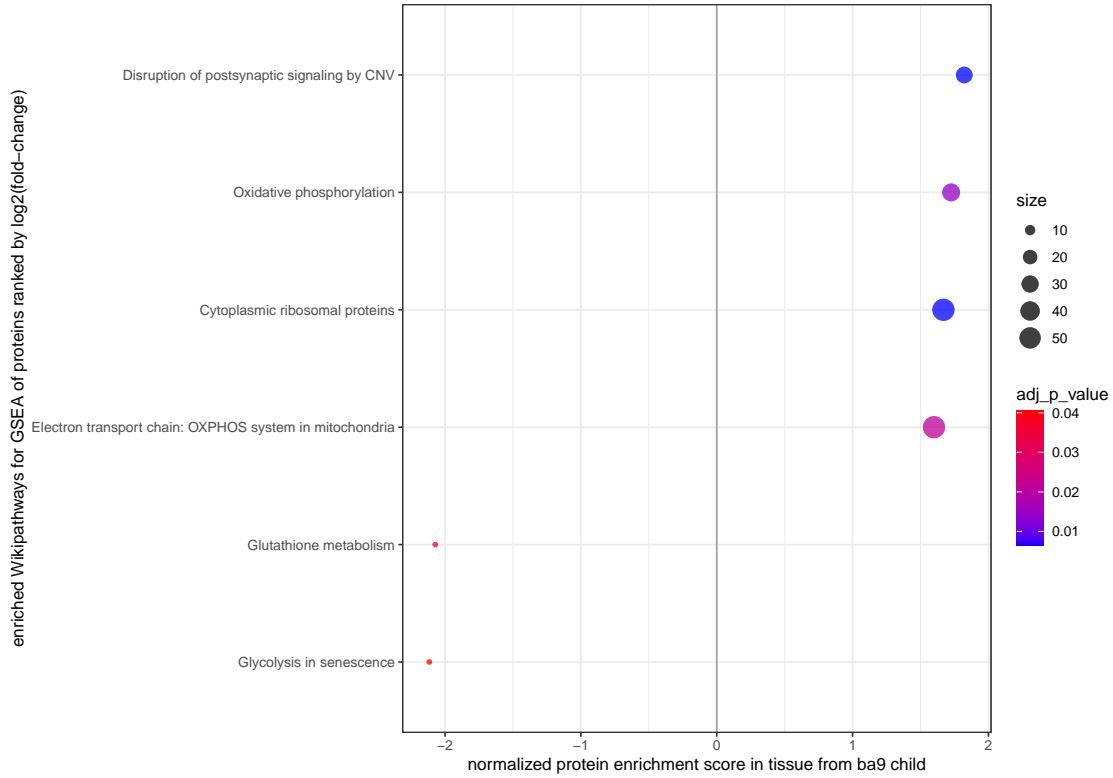

(a) Child WikiPathways

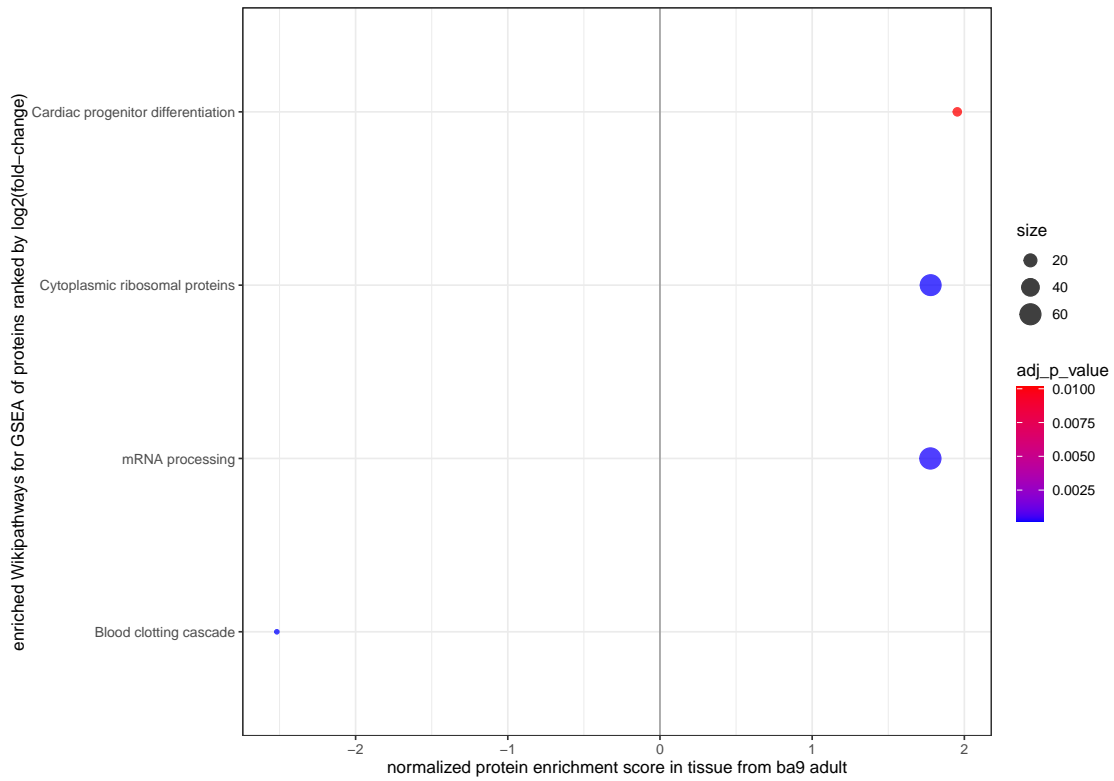

(b) Adult WikiPathways

Figure S2: GSEA enrichment of WikiPathways for proteins ranked by  $\log_2(\text{fold-change})$

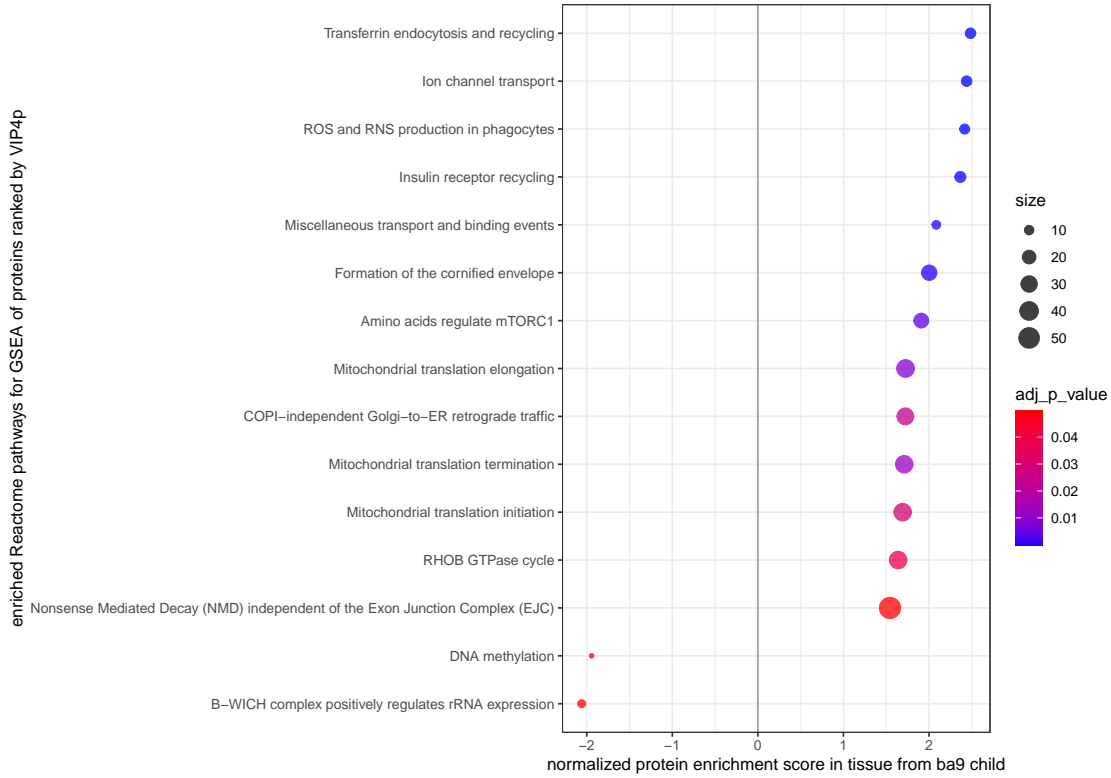

(a) Child Reactome

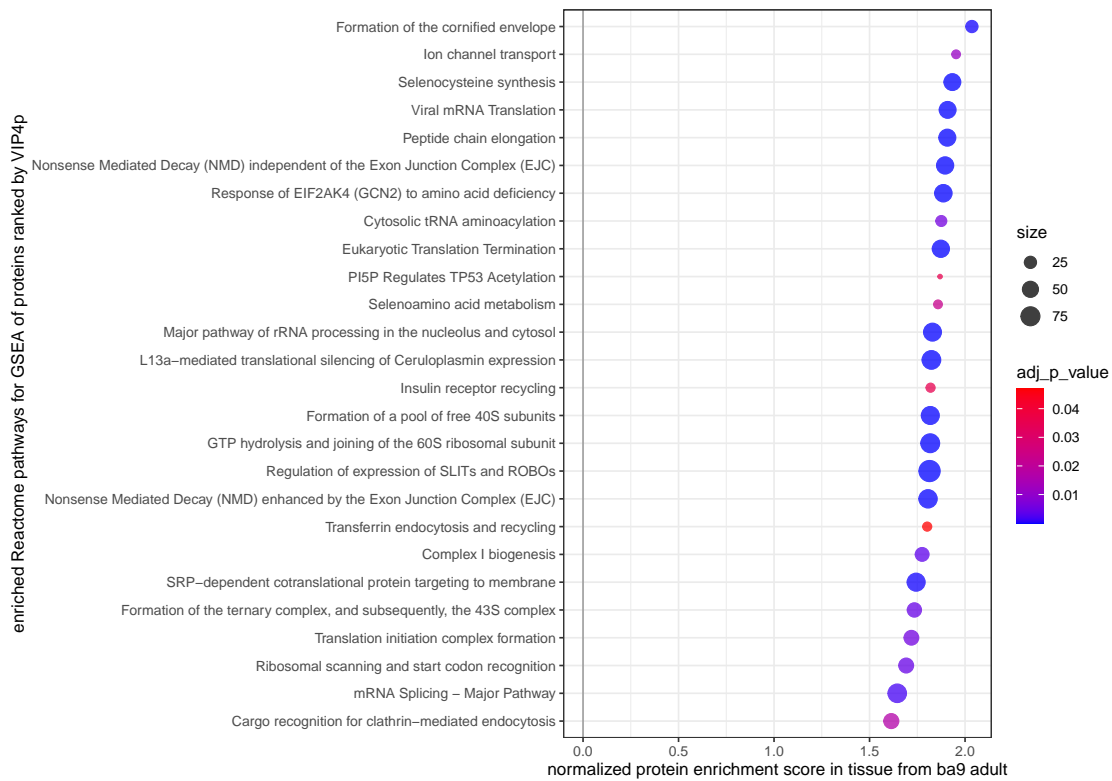

(b) Adult Reactome

Figure S3: GSEA enrichment of Reactome pathways for proteins ranked by VIP4p

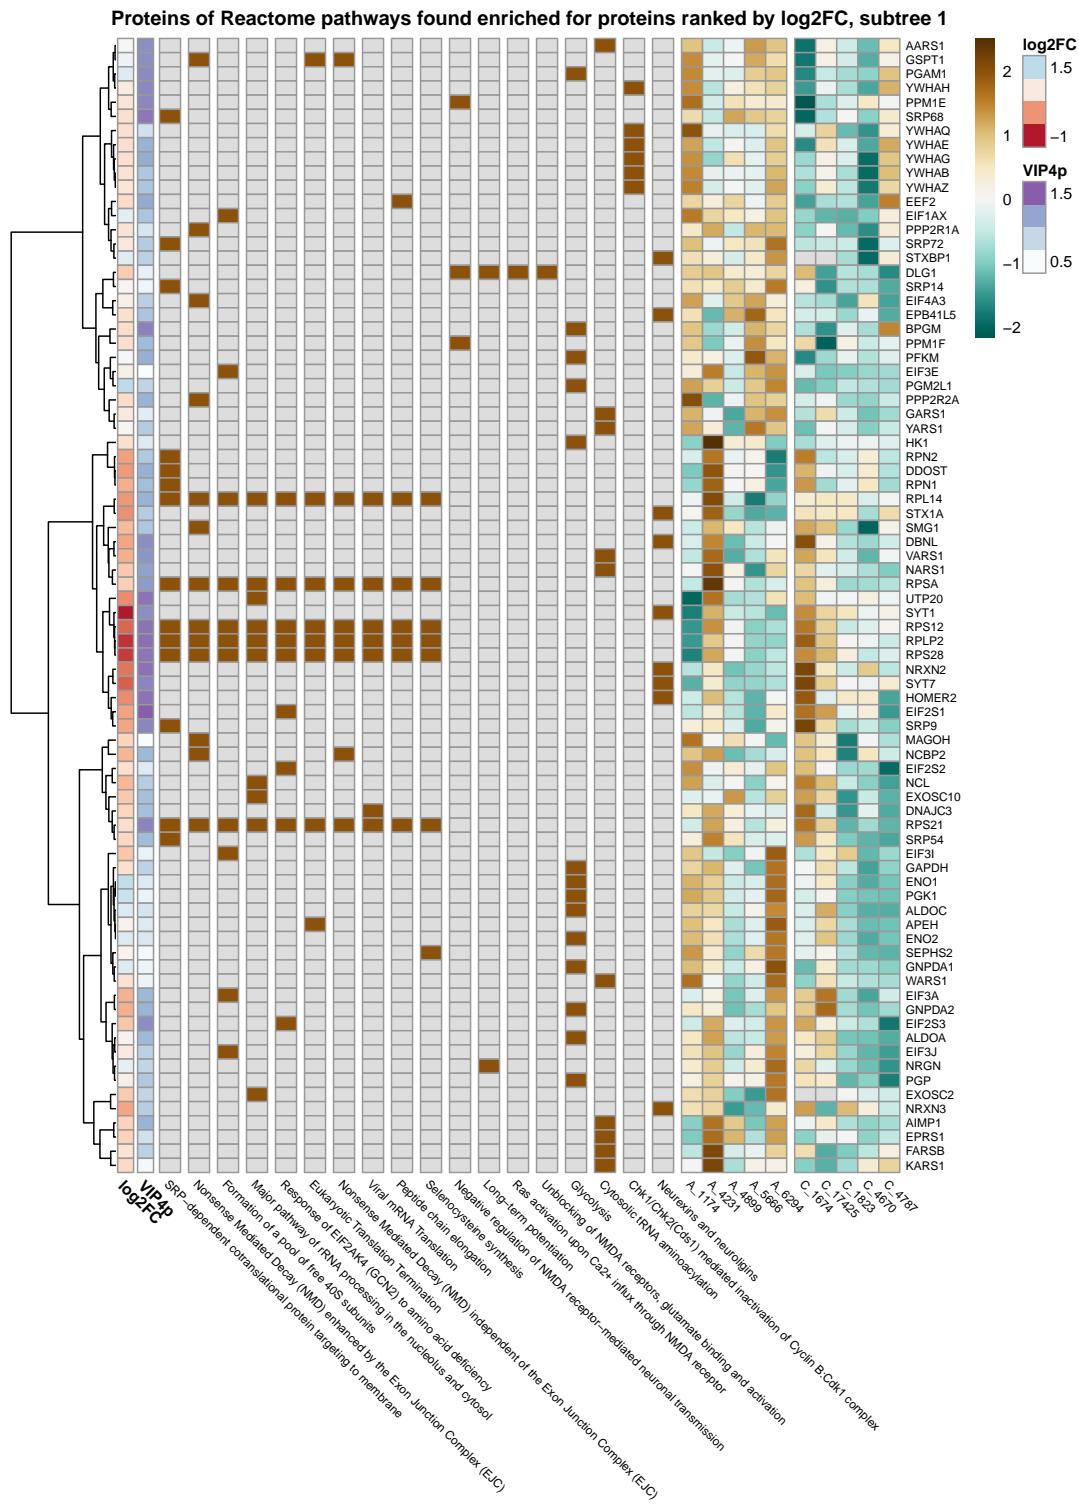

Figure S4: Heatmap 1 of Reactome pathways for children, log<sub>2</sub>(FC)-ranked proteins

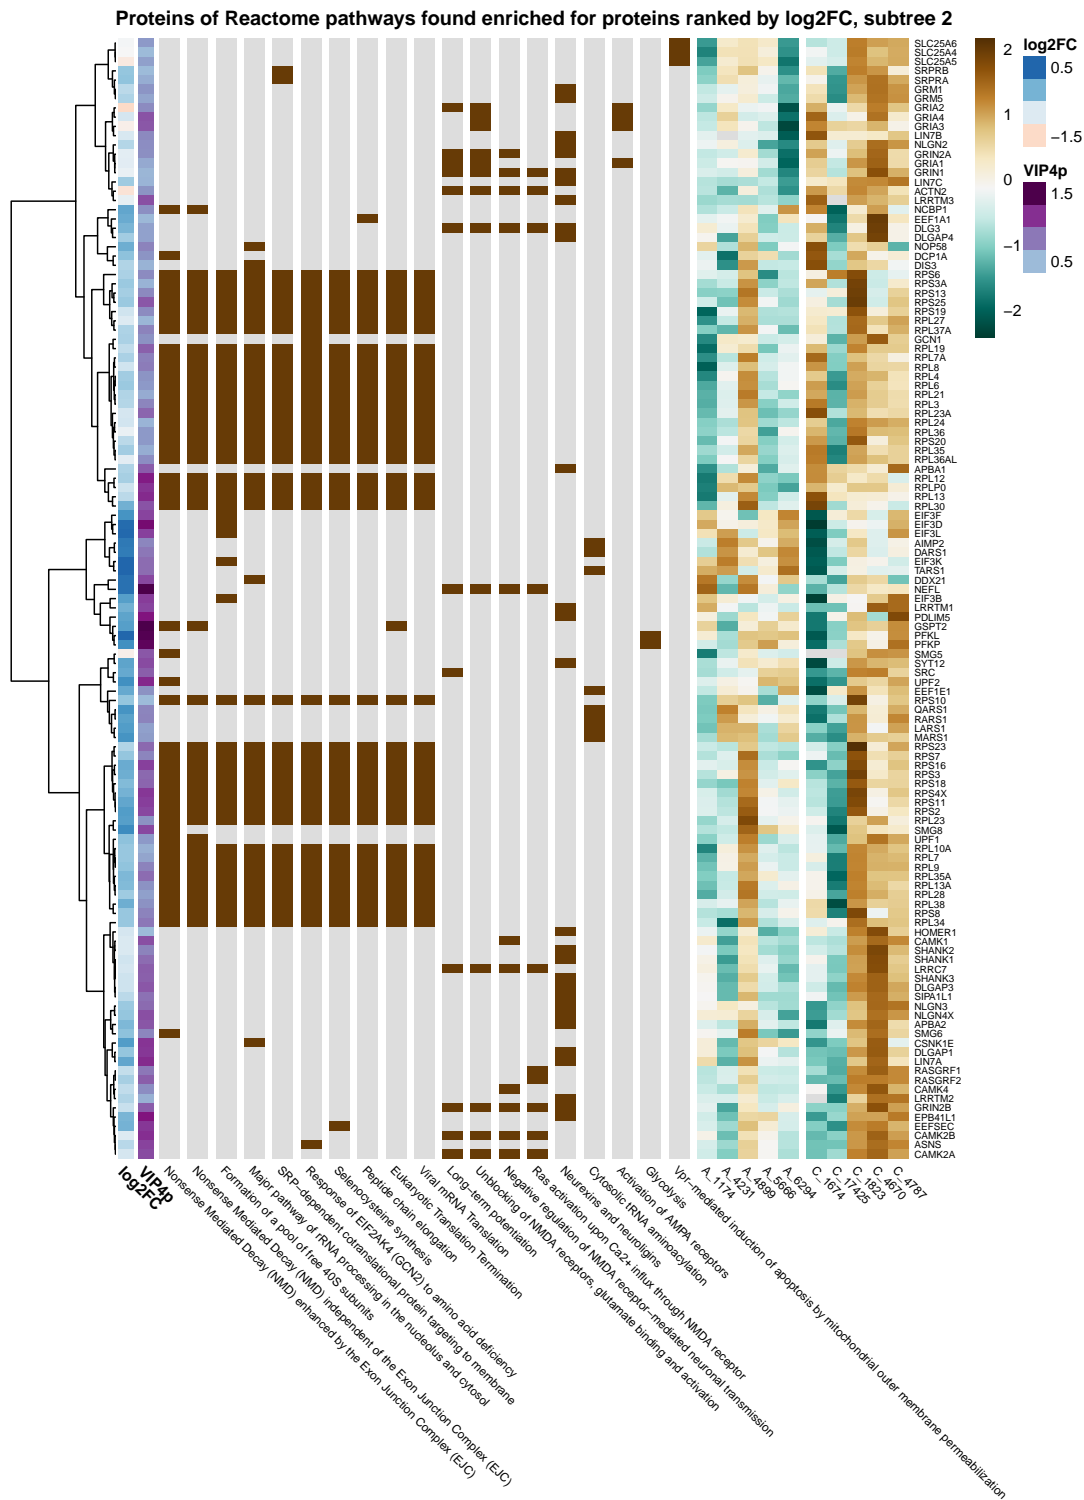

Figure S5: Heatmap 2 of Reactome pathways for children, log<sub>2</sub>(FC)-ranked proteins

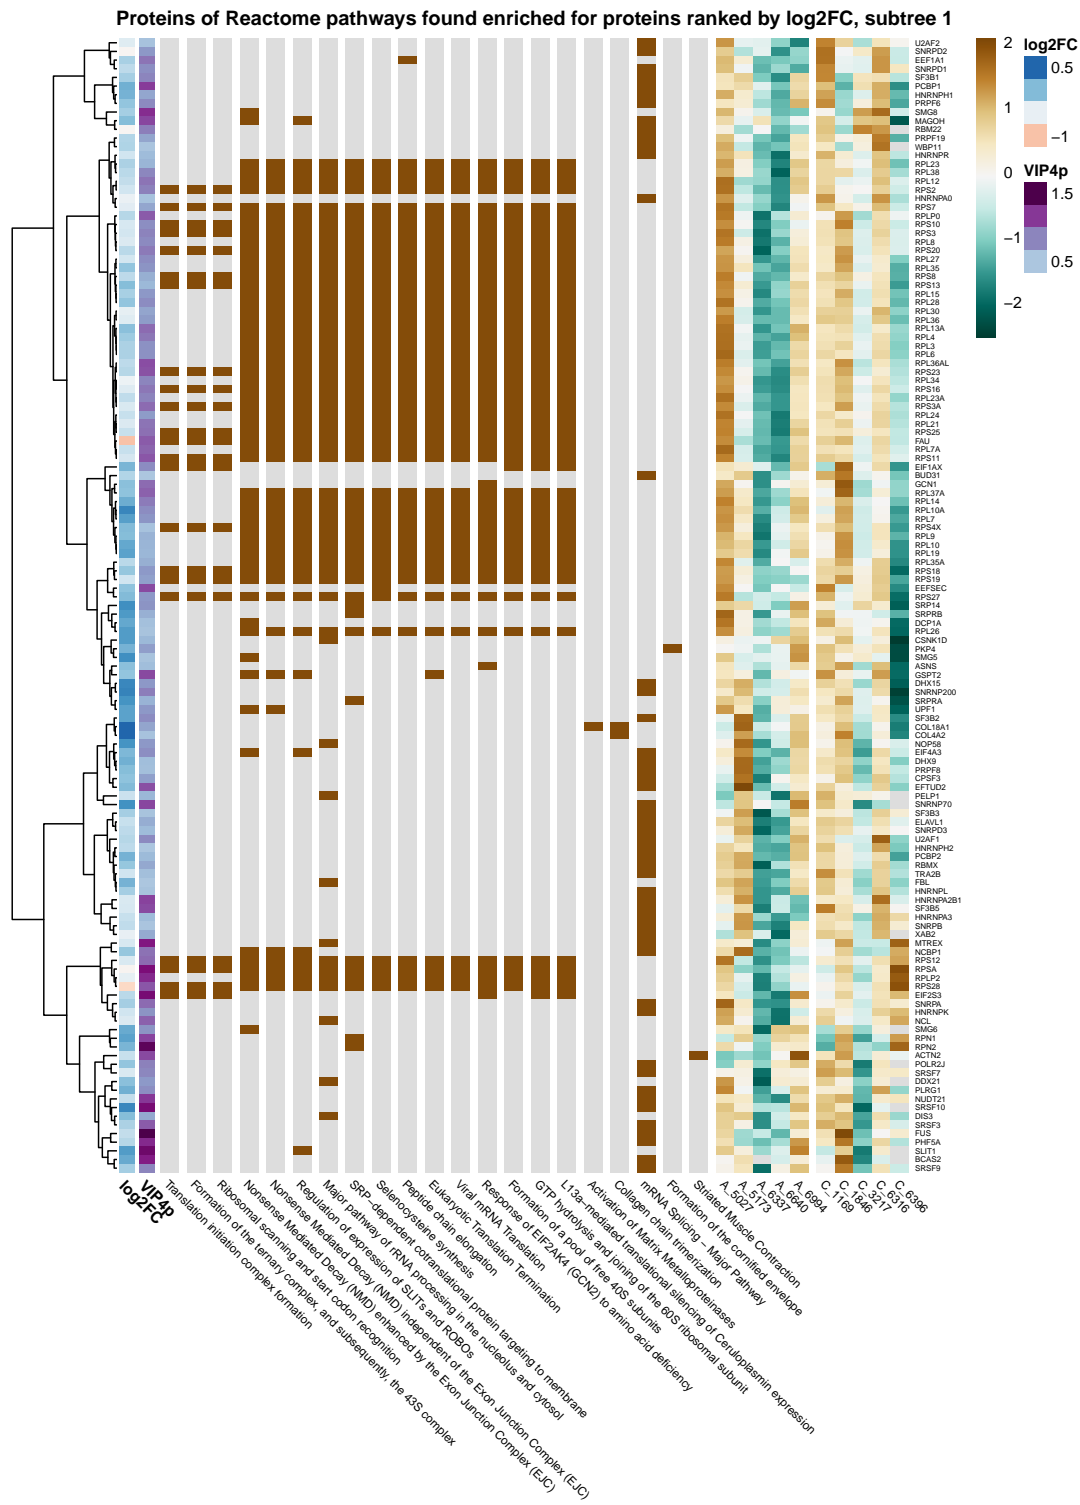

Figure S6: Heatmap 1 of Reactome pathways for adults, log<sub>2</sub>(FC)-ranked proteins

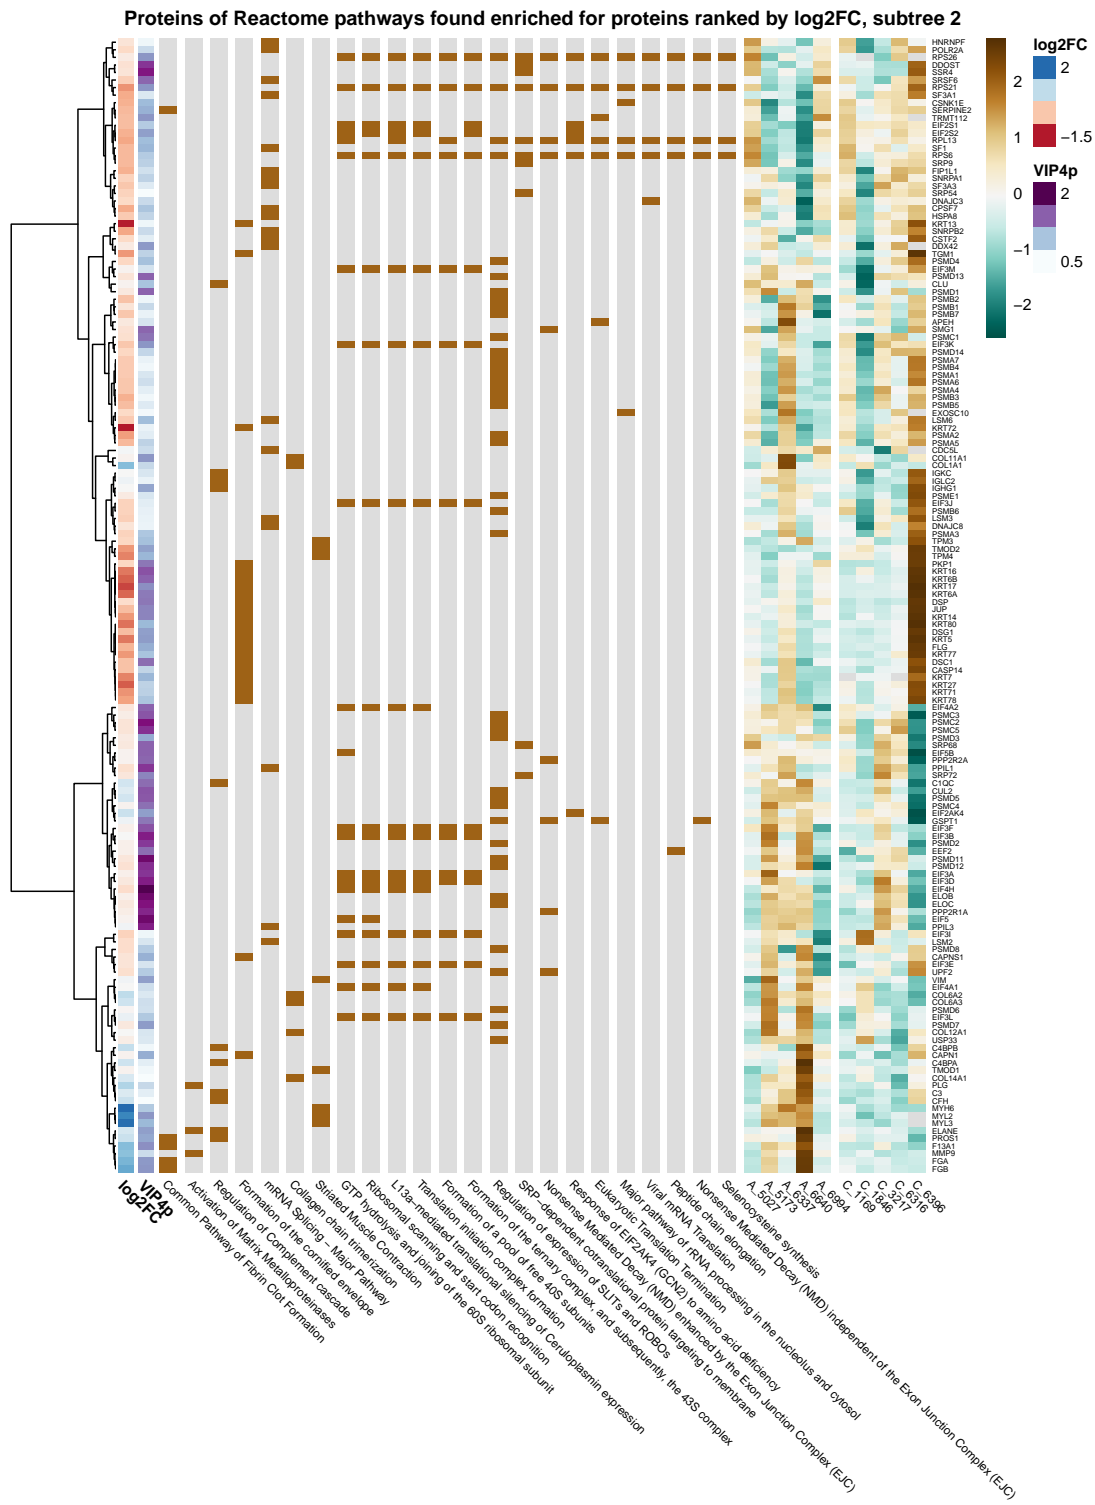

Figure S7: Heatmap 2 of Reactome pathways for adults, log<sub>2</sub>(FC)-ranked proteins



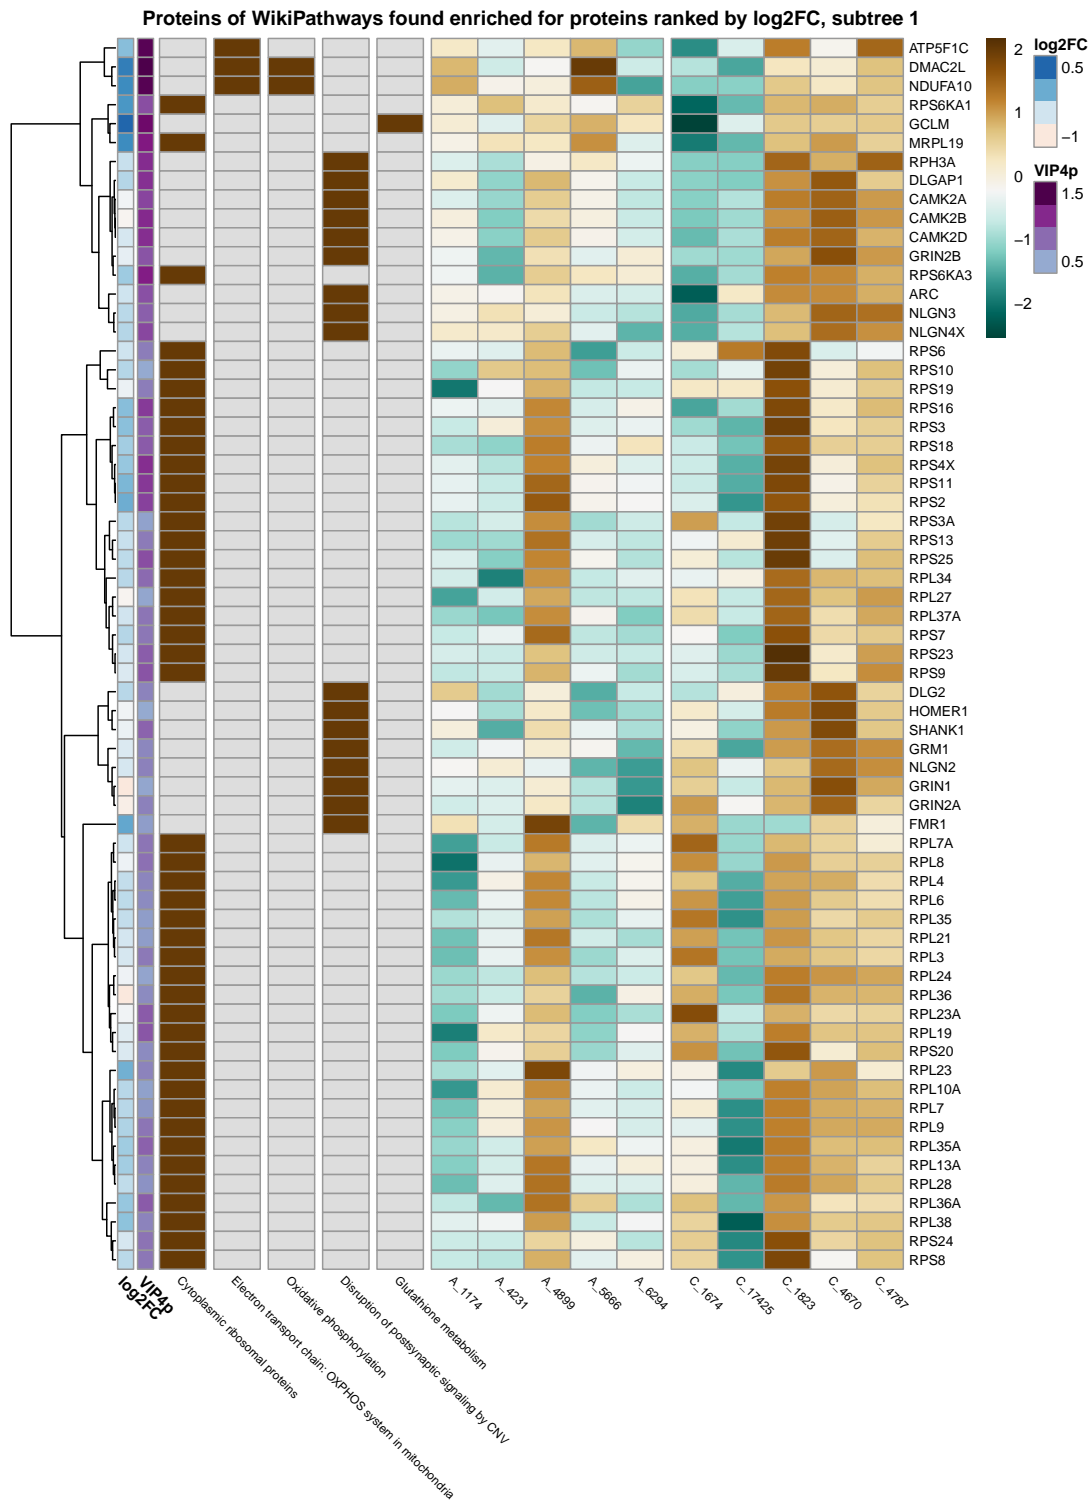

Figure S8: Heatmap 1 of WikiPathways for children, log<sub>2</sub>(FC)-ranked proteins

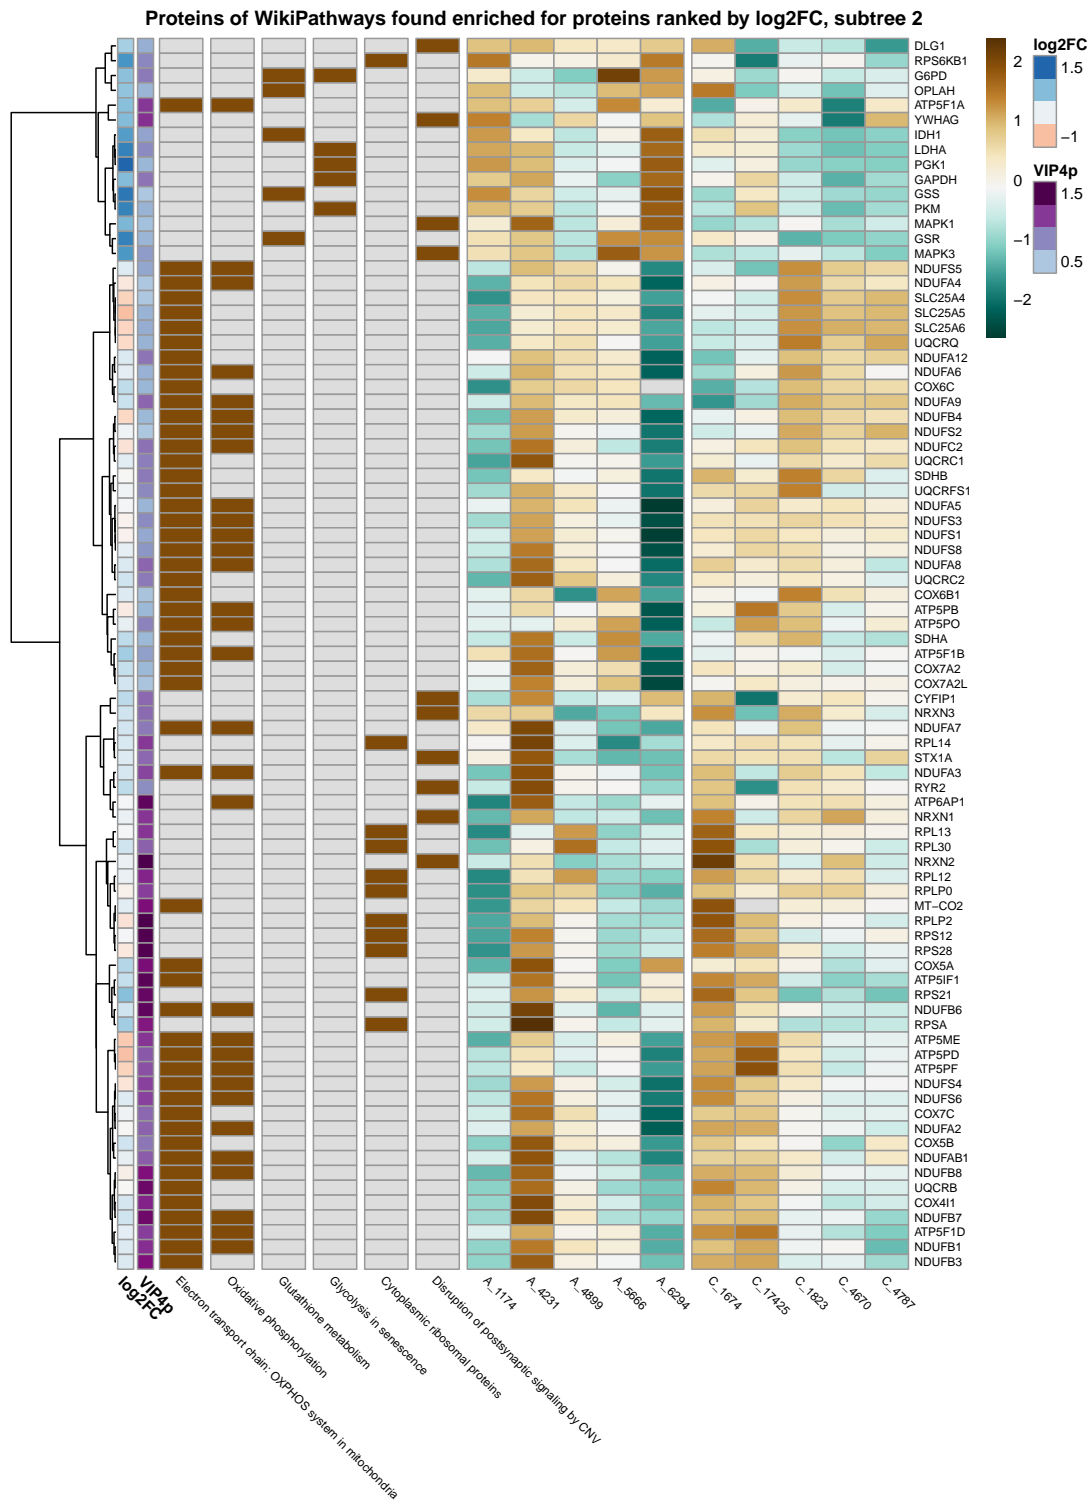

Figure S9: Heatmap 2 of WikiPathways for children, log<sub>2</sub>(FC)-ranked proteins

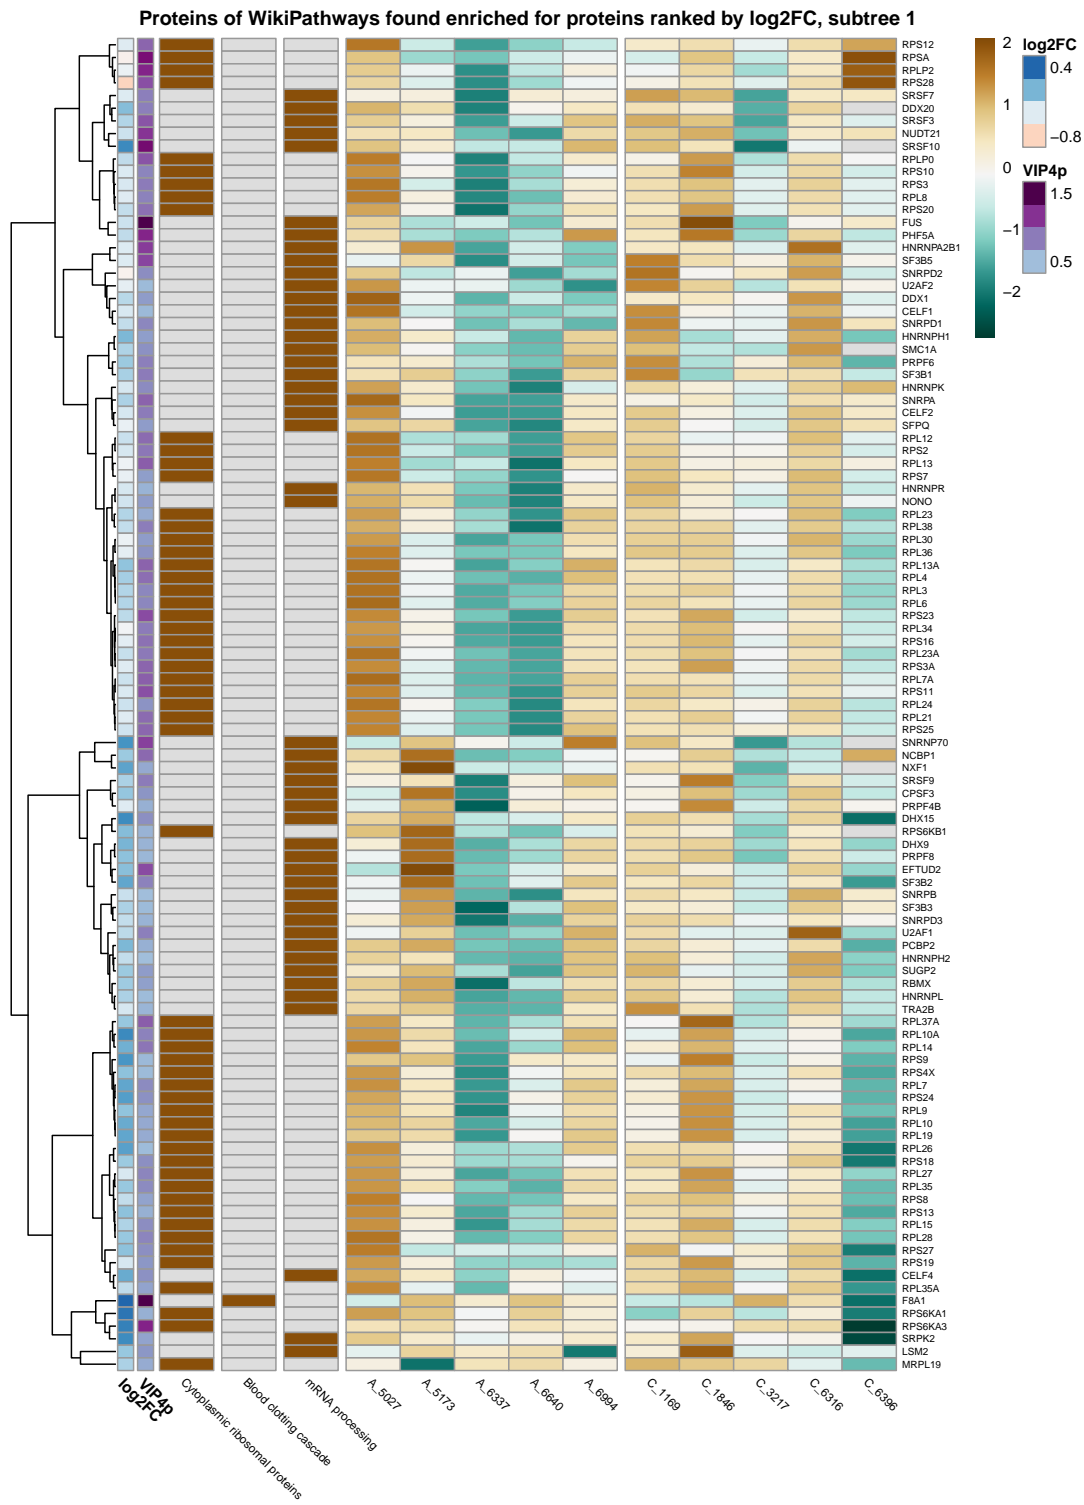

Figure S10: Heatmap 1 of WikiPathways for adults, log<sub>2</sub>(FC)-ranked proteins

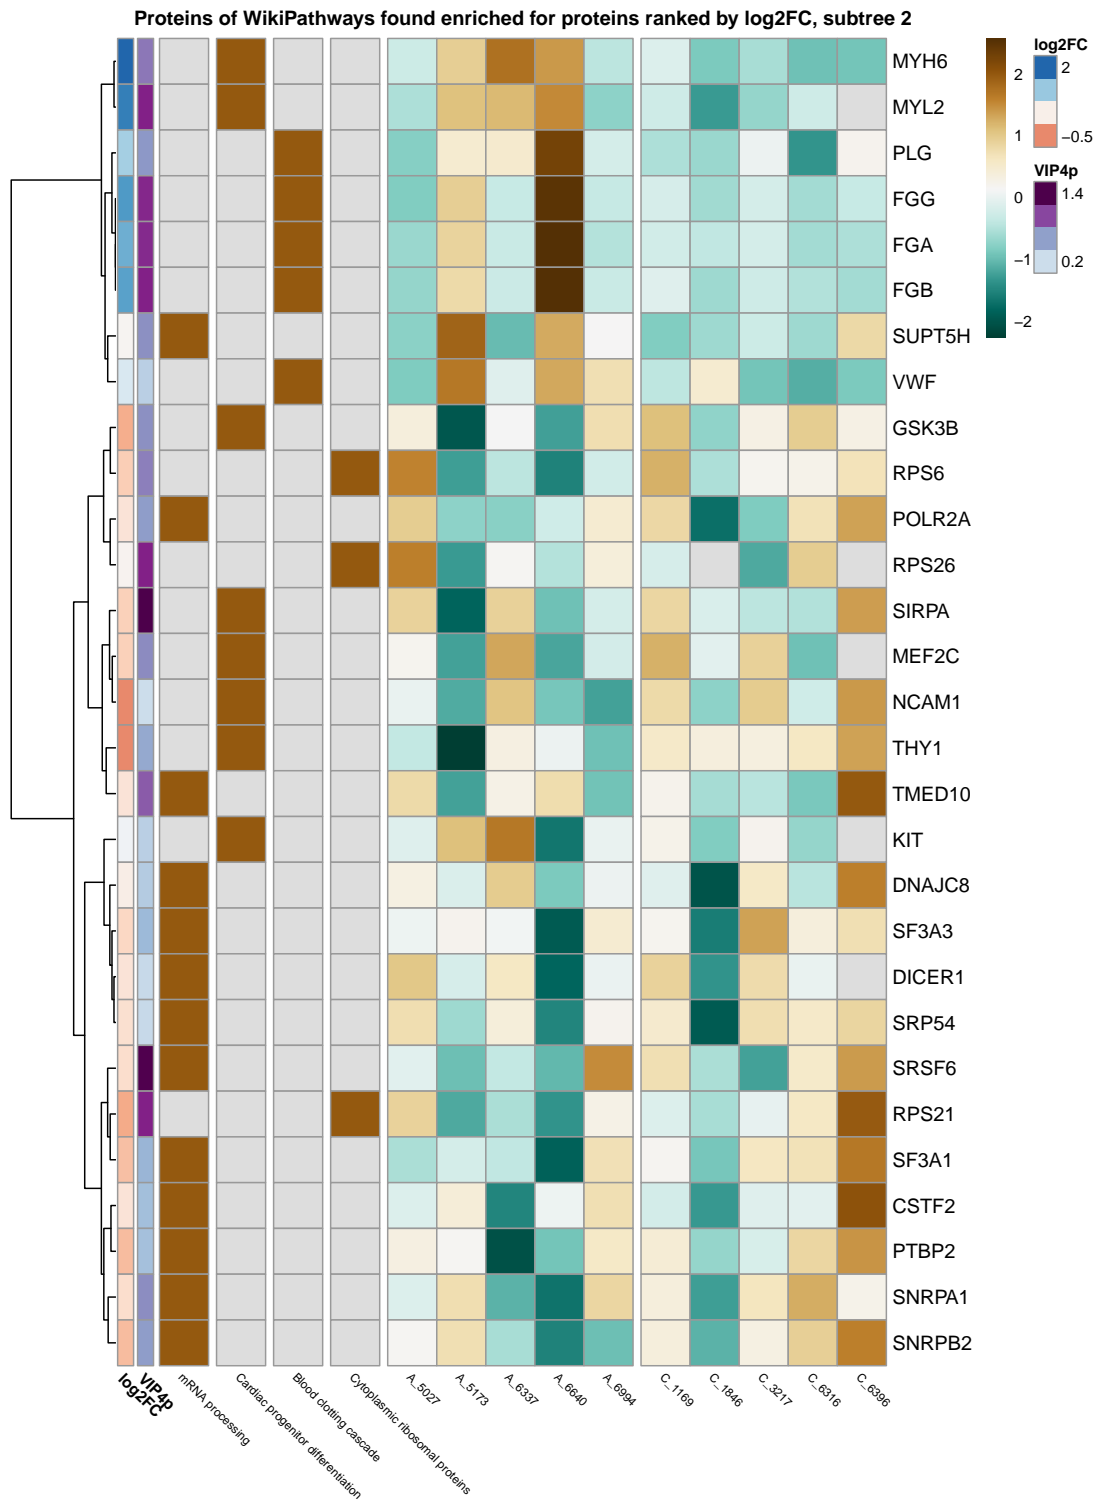

Figure S11: Heatmap 2 of WikiPathways for adults, log2(FC)-ranked proteins

Table S1: Significant differentially expressed proteins from children

| UniProtID  | Gene Name  | Description                                                              | Adjusted p-value | log2(A/C) |
|------------|------------|--------------------------------------------------------------------------|------------------|-----------|
| A0A3B3ISV5 | A0A3B3ISV5 | Uncharacterized protein                                                  | 3.6e-07          | 0.7549    |
| A0A3B3ITX4 | A0A3B3ITX4 | Uncharacterized protein                                                  | 0.0294           | -1.0600   |
| P04217     | A1BG       | Alpha-1B-glycoprotein                                                    | 0.0109           | 1.1167    |
| P01023     | A2M        | Alpha-2-macroglobulin                                                    | 3.4e-13          | 0.9091    |
| Q2M2I8     | AAK1       | AP2-associated protein kinase 1                                          | 0.0111           | 0.4786    |
| H3BNQ7     | ABAT       | 4-aminobutyrate aminotransferase, mitochondrial                          | 6.9e-06          | 0.9499    |
| Q9UBJ2     | ABCD2      | ATP-binding cassette sub-family D member 2                               | 0.0013           | -0.7740   |
| Q9NUQ8     | ABCF3      | ATP-binding cassette sub-family F member 3                               | 0.0434           | -0.7234   |
| Q9NUJ1     | ABHD10     | Mycophenolic acid acyl-glucuronide esterase, mitochondrial               | 0.0215           | 0.5975    |
| Q8IZP0     | ABI1       | Abl interactor 1                                                         | 0.0162           | -0.5218   |
| A0A3B3IS55 | ABLIM1     | Actin-binding LIM protein 1                                              | 8.1e-04          | -0.6125   |
| Q6H8Q1     | ABLIM2     | Actin-binding LIM protein 2                                              | 0.0075           | -0.6284   |
| P42765     | ACAA2      | 3-ketoacyl-CoA thiolase, mitochondrial                                   | 1.1e-04          | 0.8222    |
| Q5T4U5     | ACADM      | Acyl-Coenzyme A dehydrogenase, C-4 to C-12 straight chain, isoform CRA_a | 0.0104           | 0.5507    |
| P49748     | ACADVL     | Very long-chain specific acyl-CoA dehydrogenase, mitochondrial           | 3.5e-11          | -0.7976   |
| Q15057     | ACAP2      | Arf-GAP with coiled-coil, ANK repeat and PH domain-containing protein 2  | 0.044            | 0.6320    |
| Q9BWD1     | ACAT2      | Acetyl-CoA acetyltransferase, cytosolic                                  | 0.0186           | 0.9934    |
| P53396     | ACLY       | ATP-citrate synthase                                                     | 8.4e-09          | 0.7133    |
| P21399     | ACO1       | Cytoplasmic aconitate hydratase                                          | 5.0e-05          | 1.2813    |
| A2A274     | ACO2       | Aconitate hydratase, mitochondrial                                       | 2.2e-16          | 1.1651    |
| O00154     | ACOT7      | Cytosolic acyl coenzyme A thioester hydrolase                            | 2.1e-08          | 1.2013    |
| P12814     | ACTN1      | Alpha-actinin-1                                                          | 2.2e-16          | -1.3296   |
| P35609     | ACTN2      | Alpha-actinin-2                                                          | 2.2e-16          | -1.4944   |
| O43707     | ACTN4      | Alpha-actinin-4                                                          | 3.7e-08          | -0.5344   |
| P61160     | ACTR2      | Actin-related protein 2                                                  | 0.0115           | 0.3502    |
| P61158     | ACTR3      | Actin-related protein 3                                                  | 0.0232           | 0.3419    |
| Q9P1U1     | ACTR3B     | Actin-related protein 3B                                                 | 0.0049           | 0.4726    |
| E7EWD3     | ADAM23     | Disintegrin and metalloproteinase domain-containing protein 23           | 3.5e-04          | -1.0677   |
| P11766     | ADH5       | Alcohol dehydrogenase class-3                                            | 3.8e-13          | 1.6052    |
| P35573     | AGL        | Glycogen debranching enzyme                                              | 0.0017           | 0.8783    |
| P23526     | AHCY       | Adenosylhomocysteinase                                                   | 2.5e-09          | 1.1531    |
| O43865     | AHCYL1     | S-adenosylhomocysteine hydrolase-like protein 1                          | 2.5e-16          | 0.8926    |
| Q96HN2     | AHCYL2     | Adenosylhomocysteinase 3                                                 | 0.0483           | 0.6036    |
| Q09666     | AHNAK      | Neuroblast differentiation-associated protein AHNAK                      | 8.6e-04          | -0.3111   |
| O95433     | AHSA1      | Activator of 90 kDa heat shock protein ATPase homolog 1                  | 0.0027           | 1.0705    |
| Q13155     | AIMP2      | Aminoacyl tRNA synthase complex-interacting multifunctional protein 2    | 0.0011           | 0.8005    |
| C9J069     | AJM1       | Apical junction component 1 homolog                                      | 0.0335           | -0.6300   |
| P00568     | AK1        | Adenylate kinase isoenzyme 1                                             | 5.6e-06          | 1.2882    |
| Q9UIJ7     | AK3        | GTP:AMP phosphotransferase AK3, mitochondrial                            | 7.7e-07          | 1.7728    |

Table S1: Significant differentially expressed proteins from children (*continued*)

| UniProtID  | Gene Name | Description                                                            | Adjusted p-value | log <sub>2</sub> (A/C) |
|------------|-----------|------------------------------------------------------------------------|------------------|------------------------|
| O43687     | AKAP7     | A-kinase anchor protein 7 isoforms alpha and beta                      | 0.0218           | 0.5524                 |
| P14550     | AKR1A1    | Aldo-keto reductase family 1 member A1                                 | 6.3e-05          | 1.3495                 |
| P15121     | AKR1B1    | Aldo-keto reductase family 1 member B1                                 | 1.2e-06          | 1.8426                 |
| P00352     | ALDH1A1   | Retinal dehydrogenase 1                                                | 0.0074           | 0.9100                 |
| O75891     | ALDH1L1   | Cytosolic 10-formyltetrahydrofolate dehydrogenase                      | 0.002            | 0.6887                 |
| P05091     | ALDH2     | Aldehyde dehydrogenase, mitochondrial                                  | 6.1e-06          | 0.7464                 |
| P30038     | ALDH4A1   | Delta-1-pyrroline-5-carboxylate dehydrogenase, mitochondrial           | 0.0242           | 0.9306                 |
| P51649     | ALDH5A1   | Succinate-semialdehyde dehydrogenase, mitochondrial                    | 4.5e-06          | 0.8238                 |
| Q02252     | ALDH6A1   | Methylmalonate-semialdehyde dehydrogenase [acylating], mitochondrial   | 1.3e-05          | 0.8694                 |
| A0A1B0GTG2 | ALDH7A1   | Alpha-aminoadipic semialdehyde dehydrogenase                           | 4.1e-11          | 1.2887                 |
| P49189     | ALDH9A1   | 4-trimethylaminobutyraldehyde dehydrogenase                            | 1.3e-07          | 1.3497                 |
| P04075     | ALDOA     | Fructose-bisphosphate aldolase A                                       | 4.4e-12          | 0.8925                 |
| P09972     | ALDOC     | Fructose-bisphosphate aldolase C                                       | 9.5e-15          | 1.2409                 |
| Q01433     | AMPD2     | AMP deaminase 2                                                        | 0.0433           | 0.5424                 |
| P49418     | AMPH      | Amphiphysin                                                            | 4.4e-05          | 0.4832                 |
| P16157     | ANK1      | Ankyrin-1                                                              | 4.3e-04          | -0.6421                |
| Q01484     | ANK2      | Ankyrin-2                                                              | 1.3e-14          | -0.2813                |
| Q8IV38     | ANKMY2    | Ankyrin repeat and MYND domain-containing protein 2                    | 0.009            | 0.4438                 |
| P08133     | ANXA6     | Annexin A6                                                             | 2.2e-16          | 1.3436                 |
| O43747     | AP1G1     | AP-1 complex subunit gamma-1                                           | 0.0026           | 0.5231                 |
| K7EJL1     | AP1M1     | AP-1 complex subunit mu-1                                              | 0.0061           | 0.7477                 |
| O94973     | AP2A2     | AP-2 complex subunit alpha-2                                           | 9.2e-05          | 0.3651                 |
| Q96CW1     | AP2M1     | AP-2 complex subunit mu                                                | 3.0e-05          | 0.5457                 |
| Q13367     | AP3B2     | AP-3 complex subunit beta-2                                            | 3.5e-10          | 0.5009                 |
| P25054     | APC       | Adenomatous polyposis coli protein                                     | 0.0206           | -0.5777                |
| P13798     | APEH      | Acylamino-acid-releasing enzyme                                        | 5.0e-05          | 0.8401                 |
| P02647     | APOA1     | Apolipoprotein A-I                                                     | 0.0399           | 0.6076                 |
| P02649     | APOE      | Apolipoprotein E                                                       | 0.0049           | 0.6816                 |
| P61204     | ARF3      | ADP-ribosylation factor 3                                              | 0.0283           | 0.9699                 |
| Q5TH69     | ARFGEF3   | Brefeldin A-inhibited guanine nucleotide-exchange protein 3            | 0.0385           | 0.3820                 |
| A7KAX9     | ARHGAP32  | Rho GTPase-activating protein 32                                       | 0.0141           | -0.5838                |
| P52565     | ARHGDI1   | Rho GDP-dissociation inhibitor 1                                       | 6.6e-09          | 1.6342                 |
| Q9NVT9     | ARMC1     | Armadillo repeat-containing protein 1                                  | 0.0027           | 1.1637                 |
| Q92747     | ARPC1A    | Actin-related protein 2/3 complex subunit 1A                           | 2.1e-10          | 0.5181                 |
| O15143     | ARPC1B    | Actin-related protein 2/3 complex subunit 1B                           | 0.0394           | 0.8836                 |
| O15511     | ARPC5     | Actin-related protein 2/3 complex subunit 5                            | 0.0201           | 0.4906                 |
| O43150     | ASAP2     | Arf-GAP with SH3 domain, ANK repeat and PH domain-containing protein 2 | 0.023            | 0.4253                 |
| Q7L266     | ASRGL1    | Isoaspartyl peptidase/L-asparaginase                                   | 7.4e-05          | 1.0240                 |
| P00966     | ASS1      | Argininosuccinate synthase                                             | 1.7e-04          | 1.0369                 |
| Q86WG3     | ATCAY     | Caytaxin                                                               | 0.0237           | 0.9732                 |
| Q9NT62     | ATG3      | Ubiquitin-like-conjugating enzyme ATG3                                 | 0.0341           | 1.0214                 |

Table S1: Significant differentially expressed proteins from children (*continued*)

| UniProtID  | Gene Name | Description                                                          | Adjusted p-value | log <sub>2</sub> (A/C) |
|------------|-----------|----------------------------------------------------------------------|------------------|------------------------|
| O95352     | ATG7      | Ubiquitin-like modifier-activating enzyme ATG7                       | 0.0015           | 0.9280                 |
| P31939     | ATIC      | Bifunctional purine biosynthesis protein PURH                        | 1.5e-04          | 1.0027                 |
| B1AKY9     | ATP1A2    | Sodium/potassium-transporting ATPase subunit alpha                   | 0.0015           | 0.3370                 |
| P16615     | ATP2A2    | Sarcoplasmic/endoplasmic reticulum calcium ATPase 2                  | 9.8e-07          | 0.6566                 |
| P20020     | ATP2B1    | Plasma membrane calcium-transporting ATPase 1                        | 7.4e-08          | 0.6248                 |
| A0A2U3TZI3 | ATP2B2    | Calcium-transporting ATPase                                          | 6.5e-07          | 0.5848                 |
| Q16720     | ATP2B3    | Plasma membrane calcium-transporting ATPase 3                        | 0.0053           | 1.1061                 |
| P25705     | ATP5F1A   | ATP synthase subunit alpha, mitochondrial                            | 7.3e-09          | 0.5138                 |
| P56385     | ATP5ME    | ATP synthase subunit e, mitochondrial                                | 0.0095           | -1.1395                |
| P24539     | ATP5PB    | ATP synthase F(0) complex subunit B1, mitochondrial                  | 0.0219           | -0.7479                |
| O75947     | ATP5PD    | ATP synthase subunit d, mitochondrial                                | 1.1e-07          | -1.2763                |
| P18859     | ATP5PF    | ATP synthase-coupling factor 6, mitochondrial                        | 3.7e-04          | -1.0296                |
| Q93050     | ATP6V0A1  | V-type proton ATPase 116 kDa subunit a isoform 1                     | 1.8e-06          | -0.5801                |
| P27449     | ATP6V0C   | V-type proton ATPase 16 kDa proteolipid subunit                      | 0.0101           | -0.9300                |
| F5GYQ1     | ATP6V0D1  | V-type proton ATPase subunit                                         | 0.0109           | -0.5046                |
| P38606     | ATP6V1A   | V-type proton ATPase catalytic subunit A                             | 5.8e-04          | -0.3160                |
| Q9Y5K8     | ATP6V1D   | V-type proton ATPase subunit D                                       | 0.0039           | 0.4153                 |
| P36543     | ATP6V1E1  | V-type proton ATPase subunit E 1                                     | 0.0039           | -0.3527                |
| Q9UBB4     | ATXN10    | Ataxin-10                                                            | 3.8e-04          | 0.8789                 |
| Q13825     | AUH       | Methylglutaconyl-CoA hydratase, mitochondrial                        | 1.7e-04          | -0.6691                |
| Q9UQB8     | BAIAP2    | Brain-specific angiogenesis inhibitor 1-associated protein 2         | 3.2e-15          | -0.5550                |
| P80723     | BASP1     | Brain acid soluble protein 1                                         | 2.2e-16          | 0.9408                 |
| H0Y542     | BCAS1     | Breast carcinoma-amplified sequence 1 (Fragment)                     | 0.0496           | 0.5900                 |
| O00499     | BIN1      | Myc box-dependent-interacting protein 1                              | 1.6e-10          | 0.8263                 |
| P53004     | BLVRA     | Biliverdin reductase A                                               | 0.013            | 1.0643                 |
| P30043     | BLVRB     | Flavin reductase (NADPH)                                             | 0.0176           | 0.9777                 |
| Q9UPA5     | BSN       | Protein bassoon                                                      | 1.8e-07          | -0.4282                |
| A0A1B0GUL6 | BTBD8     | BTB/POZ domain-containing protein 8                                  | 0.0478           | 0.3305                 |
| Q07021     | C1QBP     | Complement component 1 Q subcomponent-binding protein, mitochondrial | 0.0304           | -0.7569                |
| Q9GZN8     | C20orf27  | UPF0687 protein C20orf27                                             | 0.0115           | 1.1108                 |
| P01024     | C3        | Complement C3                                                        | 1.2e-08          | 0.9933                 |
| F5GXS0     | C4B       | Complement C4-B                                                      | 1.0e-04          | 0.9575                 |
| E5RHP7     | CA1       | Carbonic anhydrase 1 (Fragment)                                      | 1.3e-07          | 2.1918                 |
| P54289     | CACNA2D1  | Voltage-dependent calcium channel subunit alpha-2/delta-1            | 5.6e-07          | -0.4571                |
| C9JVC9     | CACNA2D2  | Voltage-dependent calcium channel subunit alpha-2/delta-2            | 9.6e-06          | -0.7742                |
| Q8IZS8     | CACNA2D3  | Voltage-dependent calcium channel subunit alpha-2/delta-3            | 0.0031           | -0.6158                |
| F1T0E5     | CADPS     | Calcium-dependent secretion activator 1                              | 1.4e-04          | 0.4625                 |
| P05937     | CALB1     | Calbindin                                                            | 7.9e-04          | 1.6951                 |

Table S1: Significant differentially expressed proteins from children (*continued*)

| UniProtID  | Gene Name | Description                                                       | Adjusted p-value | log2(A/C) |
|------------|-----------|-------------------------------------------------------------------|------------------|-----------|
| H3BN14     | CALB2     | Calretinin (Fragment)                                             | 4.8e-04          | 1.5471    |
| Q9P1Z2     | CALCOCO1  | Calcium-binding and coiled-coil domain-containing protein 1       | 0.0139           | 0.5801    |
| P27797     | CALR      | Calreticulin                                                      | 3.3e-04          | 0.9691    |
| Q96NX5     | CAMK1G    | Calcium/calmodulin-dependent protein kinase type 1G               | 0.0377           | -0.7699   |
| Q9UQM7     | CAMK2A    | Calcium/calmodulin-dependent protein kinase type II subunit alpha | 1.0e-03          | -0.6622   |
| Q16566     | CAMK4     | Calcium/calmodulin-dependent protein kinase type IV               | 0.0097           | -0.4156   |
| Q96RR4     | CAMKK2    | Calcium/calmodulin-dependent protein kinase kinase 2              | 0.0396           | -0.4038   |
| Q86VP6     | CAND1     | Cullin-associated NEDD8-dissociated protein 1                     | 2.2e-16          | 0.6481    |
| P27824     | CANX      | Calnexin                                                          | 0.0059           | 0.5501    |
| Q01518     | CAP1      | Adenylyl cyclase-associated protein 1                             | 1.0e-07          | 0.4746    |
| P40123     | CAP2      | Adenylyl cyclase-associated protein 2                             | 4.4e-05          | 0.5823    |
| P07384     | CAPN1     | Calpain-1 catalytic subunit                                       | 0.0109           | 0.3150    |
| P52907     | CAPZA1    | F-actin-capping protein subunit alpha-1                           | 0.0075           | -0.5752   |
| P47755     | CAPZA2    | F-actin-capping protein subunit alpha-2                           | 5.0e-12          | -0.8425   |
| B1AK88     | CAPZB     | F-actin-capping protein subunit beta                              | 1.1e-09          | -0.5832   |
| Q5VZK9     | CARMIL1   | F-actin-uncapping protein LRRC16A                                 | 0.0268           | 0.3739    |
| Q8WXD9     | CASKIN1   | Caskin-1                                                          | 0.0148           | -0.3394   |
| P16152     | CBR1      | Carbonyl reductase [NADPH] 1                                      | 2.1e-06          | 1.8062    |
| P0DN79     | CBSL      | Cystathionine beta-synthase-like protein                          | 0.0195           | 1.5153    |
| O60826     | CCDC22    | Coiled-coil domain-containing protein 22                          | 0.0447           | 0.4600    |
| F8W9X7     | CCDC93    | Coiled-coil domain-containing protein 93                          | 0.0173           | 0.8759    |
| P78371     | CCT2      | T-complex protein 1 subunit beta                                  | 0.0016           | 0.3272    |
| P50991     | CCT4      | T-complex protein 1 subunit delta                                 | 0.0056           | 0.4052    |
| P50990     | CCT8      | T-complex protein 1 subunit theta                                 | 0.0046           | 0.2658    |
| P60953     | CDC42     | Cell division control protein 42 homolog                          | 6.8e-07          | 1.3075    |
| Q13634     | CDH18     | Cadherin-18                                                       | 0.0018           | -0.9339   |
| Q9ULB4     | CDH9      | Cadherin-9                                                        | 0.0072           | -1.0221   |
| Q9HCU4     | CELSR2    | Cadherin EGF LAG seven-pass G-type receptor 2                     | 0.0309           | -0.9130   |
| P41208     | CETN2     | Centrin-2                                                         | 0.0127           | -0.4936   |
| E9PK25     | CFL1      | Cofilin-1                                                         | 1.3e-05          | 0.7404    |
| Q9H444     | CHMP4B    | Charged multivesicular body protein 4b                            | 4.4e-05          | -0.5902   |
| A0A2R8YEI5 | CHN2      | Beta-chimaerin                                                    | 0.0483           | -0.6861   |
| Q14011     | CIRBP     | Cold-inducible RNA-binding protein                                | 0.0384           | 0.9205    |
| Q8N5K1     | CISD2     | CDGSH iron-sulfur domain-containing protein 2                     | 0.0101           | -0.7281   |
| H7BYJ3     | CIT       | Citron Rho-interacting kinase (Fragment)                          | 0.0305           | -0.4070   |
| P12277     | CKB       | Creatine kinase B-type                                            | 2.2e-04          | 0.7598    |
| E7EW49     | CLASP2    | CLIP-associating protein 2                                        | 0.0041           | 0.3090    |
| Q14677     | CLINT1    | Clathrin interactor 1                                             | 1.8e-04          | 1.1079    |
| O94985     | CLSTN1    | Calsyntenin-1                                                     | 3.0e-04          | 0.6173    |
| P09496     | CLTA      | Clathrin light chain A                                            | 0.0233           | 0.6238    |
| P09497     | CLTB      | Clathrin light chain B                                            | 9.6e-04          | 0.9839    |



Table S1: Significant differentially expressed proteins from children (*continued*)

| UniProtID  | Gene Name | Description                                                                                                | Adjusted p-value | log <sub>2</sub> (A/C) |
|------------|-----------|------------------------------------------------------------------------------------------------------------|------------------|------------------------|
| A0A087WVQ6 | CLTC      | Clathrin heavy chain                                                                                       | 2.2e-16          | 0.8630                 |
| Q8NFW8     | CMAS      | N-acylneuraminate cytidyltransferase                                                                       | 5.2e-05          | 0.6204                 |
| Q96KP4     | CNDP2     | Cytosolic non-specific dipeptidase                                                                         | 5.8e-05          | 1.2636                 |
| Q9BT09     | CNPY3     | Protein canopy homolog 3                                                                                   | 0.0148           | 0.8178                 |
| Q96F85     | CNRIP1    | CB1 cannabinoid receptor-interacting protein 1                                                             | 4.1e-11          | 1.7360                 |
| Q12860     | CNTN1     | Contactin-1                                                                                                | 6.5e-10          | -0.3771                |
| Q8IWW2     | CNTN4     | Contactin-4                                                                                                | 0.0074           | -0.3841                |
| Q9Y678     | COPG1     | Coatomer subunit gamma-1                                                                                   | 0.0277           | 0.4233                 |
| P61201     | COPS2     | COP9 signalosome complex subunit 2                                                                         | 4.5e-04          | 0.7581                 |
| Q9BT78     | COPS4     | COP9 signalosome complex subunit 4                                                                         | 2.6e-05          | 0.6431                 |
| Q92905     | COPS5     | COP9 signalosome complex subunit 5                                                                         | 0.0057           | 0.5428                 |
| Q9UBW8     | COPS7A    | COP9 signalosome complex subunit 7a                                                                        | 0.0066           | 0.8825                 |
| P31146     | CORO1A    | Coronin-1A                                                                                                 | 6.1e-15          | 0.9036                 |
| Q9BR76     | CORO1B    | Coronin-1B                                                                                                 | 0.0309           | 0.4728                 |
| Q9UQ03     | CORO2B    | Coronin-2B                                                                                                 | 0.0025           | -0.4885                |
| Q14019     | COTL1     | Coactosin-like protein                                                                                     | 0.008            | 1.1038                 |
| Q86YQ8     | CPNE8     | Copine-8                                                                                                   | 0.0326           | 0.5364                 |
| Q14194     | CRMP1     | Dihydropyrimidinase-related protein 1                                                                      | 6.7e-15          | 0.9760                 |
| Q14894     | CRYM      | Ketimine reductase mu-crystallin                                                                           | 3.1e-13          | 1.8293                 |
| P35221     | CTNNA1    | Catenin alpha-1                                                                                            | 0.0011           | -0.4775                |
| P26232     | CTNNA2    | Catenin alpha-2                                                                                            | 1.1e-05          | -0.5336                |
| A0A1B0GVD5 | CTSD      | Cathepsin D                                                                                                | 3.9e-05          | 0.6045                 |
| Q13618     | CUL3      | Cullin-3                                                                                                   | 0.0343           | 0.5042                 |
| Q9UHQ9     | CYB5R1    | NADH-cytochrome b5 reductase 1                                                                             | 2.4e-04          | -0.7344                |
| Q16643     | DBN1      | Drebrin                                                                                                    | 8.7e-08          | -0.6273                |
| P11182     | DBT       | Lipoamide acyltransferase component of branched-chain alpha-keto acid dehydrogenase complex, mitochondrial | 3.7e-04          | -0.4372                |
| O15075     | DCLK1     | Serine/threonine-protein kinase DCLK1                                                                      | 0.0489           | 0.3126                 |
| Q13561     | DCTN2     | Dynactin subunit 2                                                                                         | 0.0205           | -0.3051                |
| O94760     | DDAH1     | N(G),N(G)-dimethylarginine dimethylaminohydrolase 1                                                        | 6.6e-09          | 1.3470                 |
| Q5SRR8     | DDAH2     | N(G),N(G)-dimethylarginine dimethylaminohydrolase 2 (Fragment)                                             | 7.9e-04          | 1.2228                 |
| P30046     | DDT       | D-dopachrome decarboxylase                                                                                 | 0.0018           | 1.6003                 |
| Q92499     | DDX1      | ATP-dependent RNA helicase DDX1                                                                            | 1.9e-06          | 0.3527                 |
| A0A1W2PQ51 | DDX17     | Probable ATP-dependent RNA helicase DDX17                                                                  | 5.5e-07          | 0.7776                 |
| Q13838     | DDX39B    | Spliceosome RNA helicase DDX39B                                                                            | 2.2e-04          | 0.8751                 |
| Q16698     | DECR1     | 2,4-dienoyl-CoA reductase, mitochondrial                                                                   | 1.6e-04          | -0.7002                |
| Q08211     | DHX9      | ATP-dependent RNA helicase A                                                                               | 0.0184           | 0.7503                 |
| Q9NR28     | DIABLO    | Diablo homolog, mitochondrial                                                                              | 0.0198           | 0.6028                 |
| P10515     | DLAT      | Dihydrolipoyllysine-residue acetyltransferase component of pyruvate dehydrogenase complex, mitochondrial   | 9.3e-08          | 0.9651                 |
| E9PEX6     | DLD       | Dihydrolipoyl dehydrogenase                                                                                | 1.9e-09          | 0.8082                 |
| B9EGL1     | DLG4      | DLG4 protein                                                                                               | 0.0032           | -0.7379                |

Table S1: Significant differentially expressed proteins from children (*continued*)

| UniProtID  | Gene Name | Description                                                   | Adjusted p-value | log <sub>2</sub> (A/C) |
|------------|-----------|---------------------------------------------------------------|------------------|------------------------|
| Q9Y2H0     | DLGAP4    | Disks large-associated protein 4                              | 0.0026           | -0.6134                |
| Q08495     | DMTN      | Dematin                                                       | 1.8e-06          | -0.6264                |
| F5H269     | DMXL1     | DmX-like protein 1                                            | 0.0194           | -0.2459                |
| Q8TDJ6     | DMXL2     | DmX-like protein 2                                            | 2.1e-12          | -0.3617                |
| P25685     | DNAJB1    | DnaJ homolog subfamily B member 1                             | 1.2e-04          | -0.4779                |
| Q9UDY4     | DNAJB4    | DnaJ homolog subfamily B member 4                             | 0.002            | -0.4502                |
| O75953     | DNAJB5    | DnaJ homolog subfamily B member 5                             | 0.026            | -0.7001                |
| Q96DA6     | DNAJC19   | Mitochondrial import inner membrane translocase subunit TIM14 | 0.0022           | -0.6073                |
| O75061     | DNAJC6    | Putative tyrosine-protein phosphatase auxilin                 | 0.0012           | 0.5527                 |
| A0A0D9SFB1 | DNM1      | Dynamin-1                                                     | 2.1e-04          | 0.2054                 |
| A0A0U1RQP1 | DNM1      | Dynamin-1                                                     | 2.1e-04          | 0.2054                 |
| G8JLD5     | DNM1L     | Dynamin-1-like protein                                        | 2.2e-16          | 1.2614                 |
| O00429     | DNM1L     | Dynamin-1-like protein                                        | 2.2e-16          | 1.2614                 |
| Q9UQ16     | DNM3      | Dynamin-3                                                     | 0.0152           | 0.2580                 |
| Q9BZ29     | DOCK9     | Dedicator of cytokinesis protein 9                            | 0.034            | -0.4379                |
| A0A1C7CYX9 | DPYSL2    | Dihydropyrimidinase-related protein 2                         | 2.2e-16          | 1.0527                 |
| Q14195     | DPYSL3    | Dihydropyrimidinase-related protein 3                         | 3.0e-12          | 1.2664                 |
| O14531     | DPYSL4    | Dihydropyrimidinase-related protein 4                         | 1.4e-09          | 1.0767                 |
| Q9BPU6     | DPYSL5    | Dihydropyrimidinase-related protein 5                         | 2.2e-16          | 1.2326                 |
| F6RFD5     | DSTN      | Destrin                                                       | 0.0071           | 0.7247                 |
| O60941     | DTNB      | Dystrobrevin beta                                             | 0.0201           | -0.4004                |
| P51452     | DUSP3     | Dual specificity protein phosphatase 3                        | 0.0036           | 1.8049                 |
| Q14204     | DYNC1H1   | Cytoplasmic dynein 1 heavy chain 1                            | 5.4e-06          | -0.1532                |
| Q9Y6G9     | DYNC1LI1  | Cytoplasmic dynein 1 light intermediate chain 1               | 1.0e-04          | -0.4037                |
| O43237     | DYNC1LI2  | Cytoplasmic dynein 1 light intermediate chain 2               | 0.0451           | -0.3517                |
| Q8NCM8     | DYNC2H1   | Cytoplasmic dynein 2 heavy chain 1                            | 0.044            | -0.4989                |
| P30084     | ECHS1     | Enoyl-CoA hydratase, mitochondrial                            | 7.7e-11          | 1.1881                 |
| P26641     | EEF1G     | Elongation factor 1-gamma                                     | 0.004            | 0.3600                 |
| P13639     | EEF2      | Elongation factor 2                                           | 8.7e-07          | 0.5210                 |
| Q9NZN3     | EHD3      | EH domain-containing protein 3                                | 0.006            | 0.4261                 |
| P47813     | EIF1AX    | Eukaryotic translation initiation factor 1A, X-chromosomal    | 3.5e-05          | 1.1599                 |
| P20042     | EIF2S2    | Eukaryotic translation initiation factor 2 subunit 2          | 0.0091           | 0.6469                 |
| P41091     | EIF2S3    | Eukaryotic translation initiation factor 2 subunit 3          | 0.0207           | 0.4048                 |
| P60228     | EIF3E     | Eukaryotic translation initiation factor 3 subunit E          | 8.9e-05          | 0.8006                 |
| A0A087WZK9 | EIF3H     | Eukaryotic translation initiation factor 3 subunit H          | 0.0235           | 0.4532                 |
| O75822     | EIF3J     | Eukaryotic translation initiation factor 3 subunit J          | 0.0016           | 0.6424                 |
| Q14240     | EIF4A2    | Eukaryotic initiation factor 4A-II                            | 0.0105           | 0.7773                 |
| P38919     | EIF4A3    | Eukaryotic initiation factor 4A-III                           | 0.0078           | 0.7500                 |
| E7EX17     | EIF4B     | Eukaryotic translation initiation factor 4B                   | 0.0059           | 1.1343                 |
| E7EX73     | EIF4G1    | Eukaryotic translation initiation factor 4 gamma 1            | 1.5e-04          | 0.4765                 |
| O43432     | EIF4G3    | Eukaryotic translation initiation factor 4 gamma 3            | 0.0093           | 0.3525                 |
| P55010     | EIF5      | Eukaryotic translation initiation factor 5                    | 0.0361           | 0.5743                 |
| I3L397     | EIF5A     | Eukaryotic translation initiation factor 5A (Fragment)        | 8.3e-06          | 0.7658                 |

Table S1: Significant differentially expressed proteins from children (*continued*)

| UniProtID  | Gene Name | Description                                                 | Adjusted p-value | log <sub>2</sub> (A/C) |
|------------|-----------|-------------------------------------------------------------|------------------|------------------------|
| Q5R3F8     | ELFN2     | Protein phosphatase 1 regulatory subunit 29                 | 0.0168           | -0.8109                |
| A0A0U1RRM6 | ENAH      | Protein enabled homolog                                     | 0.0091           | -0.6187                |
| P06733     | ENO1      | Alpha-enolase                                               | 2.2e-16          | 1.5125                 |
| P09104     | ENO2      | Gamma-enolase                                               | 1.2e-04          | 1.5396                 |
| E9PHY5     | EPB41L2   | Band 4.1-like protein 2                                     | 2.1e-04          | 0.5038                 |
| A0A0A0MRA8 | EPB41L3   | Band 4.1-like protein 3                                     | 6.2e-04          | 0.2181                 |
| P54764     | EPHA4     | Ephrin type-A receptor 4                                    | 0.0185           | -0.4933                |
| Q9Y6I3     | EPN1      | Epsin-1                                                     | 6.9e-04          | 0.6581                 |
| Q96J88     | EPSTI1    | Epithelial-stromal interaction protein 1                    | 0.0196           | -0.5027                |
| X6RLX0     | ERC1      | ELKS/Rab6-interacting/CAST family member 1                  | 5.6e-05          | -0.7277                |
| O15083     | ERC2      | ERC protein 2                                               | 1.9e-05          | -0.7354                |
| O43414     | ERI3      | ERI1 exoribonuclease 3                                      | 2.1e-04          | 0.8615                 |
| P10768     | ESD       | S-formylglutathione hydrolase                               | 2.1e-04          | 1.1951                 |
| B7Z7P8     | ETF1      | Eukaryotic peptide chain release factor subunit 1           | 6.2e-05          | 0.8224                 |
| P13804     | ETFA      | Electron transfer flavoprotein subunit alpha, mitochondrial | 2.6e-06          | 0.9831                 |
| P38117     | ETFB      | Electron transfer flavoprotein subunit beta                 | 6.0e-05          | 1.3079                 |
| Q9UI08     | EVL       | Ena/VASP-like protein                                       | 0.0406           | -0.3448                |
| P15311     | EZR       | Ezrin                                                       | 0.013            | 0.5365                 |
| O15540     | FABP7     | Fatty acid-binding protein, brain                           | 0.0069           | 1.6254                 |
| Q9NRY5     | FAM114A2  | Protein FAM114A2                                            | 0.0246           | 0.7264                 |
| Q8IXS8     | FAM126B   | Protein FAM126B                                             | 0.0354           | -0.3581                |
| Q52LJ0     | FAM98B    | Protein FAM98B                                              | 2.2e-04          | 0.6135                 |
| K7ER00     | FARSA     | Phenylalanine-tRNA ligase alpha subunit                     | 0.0081           | 0.4556                 |
| Q9NSD9     | FARSB     | Phenylalanine-tRNA ligase beta subunit                      | 8.1e-06          | 0.6149                 |
| P49327     | FASN      | Fatty acid synthase                                         | 2.0e-12          | 0.7258                 |
| Q8TF61     | FBXO41    | F-box only protein 41                                       | 0.0219           | -0.3909                |
| P14324     | FDPS      | Farnesyl pyrophosphate synthase                             | 0.0196           | 0.8493                 |
| P02671     | FGA       | Fibrinogen alpha chain                                      | 0.0049           | 0.4792                 |
| C9JEU5     | FGG       | Fibrinogen gamma chain                                      | 0.0213           | 0.4764                 |
| P07954     | FH        | Fumarate hydratase, mitochondrial                           | 8.9e-07          | 0.8864                 |
| Q5JXI8     | FHL1      | Four and a half LIM domains protein 1 (Fragment)            | 0.0473           | 0.9171                 |
| Q02790     | FKBP4     | Peptidyl-prolyl cis-trans isomerase FKBP4                   | 0.0029           | 0.7755                 |
| P21333     | FLNA      | Filamin-A                                                   | 0.0099           | 0.2432                 |
| O75955     | FLOT1     | Flotillin-1                                                 | 3.5e-04          | -0.4089                |
| Q14254     | FLOT2     | Flotillin-2                                                 | 5.3e-05          | -0.5270                |
| O43155     | FLRT2     | Leucine-rich repeat transmembrane protein FLRT2             | 0.05             | -0.6095                |
| Q9H479     | FN3K      | Fructosamine-3-kinase                                       | 5.5e-14          | 0.9813                 |
| Q9HA64     | FN3KRP    | Ketosamine-3-kinase                                         | 0.0082           | 0.9219                 |
| Q16658     | FSCN1     | Fascin                                                      | 0.0236           | 0.5373                 |
| Q9BTV5     | FSD1      | Fibronectin type III and SPRY domain-containing protein 1   | 3.4e-04          | 0.5561                 |
| A0A0C4DG97 | FSD1L     | FSD1-like protein                                           | 0.0037           | 0.3671                 |
| P02794     | FTH1      | Ferritin heavy chain                                        | 3.8e-04          | 0.9982                 |
| P02792     | FTL       | Ferritin light chain                                        | 5.6e-05          | 0.9558                 |
| P35637     | FUS       | RNA-binding protein FUS                                     | 0.002            | 0.6518                 |

Table S1: Significant differentially expressed proteins from children (*continued*)

| UniProtID  | Gene Name | Description                                                       | Adjusted p-value | log2(A/C) |
|------------|-----------|-------------------------------------------------------------------|------------------|-----------|
| P11413     | G6PD      | Glucose-6-phosphate 1-dehydrogenase                               | 0.0278           | 0.5722    |
| P60520     | GABARAPL2 | Gamma-aminobutyric acid receptor-associated protein-like 2        | 7.6e-07          | -0.6391   |
| Q9UBS5     | GABBR1    | Gamma-aminobutyric acid type B receptor subunit 1                 | 6.4e-05          | -0.5831   |
| P14867     | GABRA1    | Gamma-aminobutyric acid receptor subunit alpha-1                  | 0.0109           | -0.4685   |
| P28472     | GABRB3    | Gamma-aminobutyric acid receptor subunit beta-3                   | 0.0407           | -0.7577   |
| Q14697     | GANAB     | Neutral alpha-glucosidase AB                                      | 0.0228           | 0.7523    |
| P17677     | GAP43     | Neuromodulin                                                      | 0.0351           | 0.3829    |
| P04406     | GAPDH     | Glyceraldehyde-3-phosphate dehydrogenase                          | 2.2e-16          | 0.7086    |
| P22102     | GART      | Trifunctional purine biosynthetic protein adenosine-3             | 0.0296           | 0.6360    |
| Q9Y2T3     | GDA       | Guanine deaminase                                                 | 3.4e-14          | 1.3378    |
| P31150     | GDI1      | Rab GDP dissociation inhibitor alpha                              | 2.2e-16          | 1.2155    |
| P50395     | GDI2      | Rab GDP dissociation inhibitor beta                               | 1.0e-06          | 1.1792    |
| K7EMP8     | GFAP      | Glial fibrillary acidic protein                                   | 9.3e-08          | 0.8679    |
| Q9NZ52     | GGA3      | ADP-ribosylation factor-binding protein GGA3                      | 0.0127           | 1.3875    |
| Q6Y7W6     | GIGYF2    | GRB10-interacting GYF protein 2                                   | 0.0451           | -0.6345   |
| P17302     | GJA1      | Gap junction alpha-1 protein                                      | 0.0359           | -0.5931   |
| Q04760     | GLO1      | Lactoylglutathione lyase                                          | 1.4e-06          | 1.0381    |
| F6TLX2     | GLOD4     | Glyoxalase domain-containing protein 4                            | 5.5e-04          | 1.9466    |
| A0A2R8YDT1 | GLUL      | Glutamine synthetase                                              | 9.3e-16          | 1.0722    |
| P36915     | GNL1      | Guanine nucleotide-binding protein-like 1                         | 0.0059           | 0.9834    |
| P46926     | GNPDA1    | Glucosamine-6-phosphate isomerase 1                               | 0.0046           | 1.3757    |
| P17174     | GOT1      | Aspartate aminotransferase, cytoplasmic                           | 1.3e-13          | 1.8316    |
| P00505     | GOT2      | Aspartate aminotransferase, mitochondrial                         | 1.7e-10          | 0.9369    |
| Q8N335     | GPD1L     | Glycerol-3-phosphate dehydrogenase 1-like protein                 | 7.9e-08          | 1.5523    |
| Q5T848     | GPR158    | Probable G-protein coupled receptor 158                           | 0.0016           | 0.5989    |
| Q7Z2K8     | GPRIN1    | G protein-regulated inducer of neurite outgrowth 1                | 3.1e-04          | 0.3917    |
| P62993     | GRB2      | Growth factor receptor-bound protein 2                            | 4.4e-06          | 1.3421    |
| Q9UBQ7     | GRHPR     | Glyoxylate reductase/hydroxypyruvate reductase                    | 0.0205           | 1.5461    |
| P42261     | GRIA1     | Glutamate receptor 1                                              | 3.0e-07          | -1.0619   |
| H0Y972     | GRIA2     | Glutamate receptor 2 (Fragment)                                   | 2.2e-16          | -1.0809   |
| P42262     | GRIA2     | Glutamate receptor 2                                              | 2.2e-16          | -1.0809   |
| P42263     | GRIA3     | Glutamate receptor 3                                              | 1.8e-08          | -1.0398   |
| P48058     | GRIA4     | Glutamate receptor 4                                              | 3.6e-05          | -0.7505   |
| Q05586     | GRIN1     | Glutamate receptor ionotropic, NMDA 1                             | 9.4e-12          | -0.9982   |
| Q12879     | GRIN2A    | Glutamate receptor ionotropic, NMDA 2A                            | 1.9e-08          | -0.9411   |
| Q13224     | GRIN2B    | Glutamate receptor ionotropic, NMDA 2B                            | 0.004            | -0.6589   |
| A0A0A0MT01 | GSN       | Gelsolin                                                          | 0.0306           | 0.3735    |
| P15170     | GSPT1     | Eukaryotic peptide chain release factor GTP-binding subunit ERF3A | 0.0091           | 0.4736    |
| P48637     | GSS       | Glutathione synthetase                                            | 0.0281           | 1.0849    |
| E7EWW9     | GSTM1     | Glutathione S-transferase Mu 1                                    | 7.0e-04          | 1.3128    |
| E9PHN7     | GSTM2     | Glutathione S-transferase Mu 2                                    | 0.0036           | 1.4926    |
| P78417     | GSTO1     | Glutathione S-transferase omega-1                                 | 0.0041           | 1.3453    |
| P46976     | GYG1      | Glycogenin-1                                                      | 0.0268           | 0.7498    |
| H0YFD6     | HADHA     | Trifunctional enzyme subunit alpha, mitochondrial                 | 6.9e-04          | 0.2946    |

Table S1: Significant differentially expressed proteins from children (*continued*)

| UniProtID  | Gene Name | Description                                                  | Adjusted p-value | log <sub>2</sub> (A/C) |
|------------|-----------|--------------------------------------------------------------|------------------|------------------------|
| Q16775     | HAGH      | Hydroxyacylglutathione hydrolase, mitochondrial              | 0.0478           | 0.4151                 |
| P10915     | HAPLN1    | Hyaluronan and proteoglycan link protein 1                   | 0.0323           | -0.2592                |
| P02042     | HBD       | Hemoglobin subunit delta                                     | 2.2e-16          | 1.6296                 |
| P51858     | HDGF      | Hepatoma-derived growth factor                               | 0.0466           | 1.2052                 |
| A0A3B3IRV5 | HEBP1     | Heme-binding protein 1 (Fragment)                            | 0.0194           | 0.7685                 |
| J3KPF0     | HECTD4    | Probable E3 ubiquitin-protein ligase HECTD4                  | 1.4e-05          | -0.4247                |
| O14964     | HGS       | Hepatocyte growth factor-regulated tyrosine kinase substrate | 2.1e-04          | 0.6676                 |
| Q6NVY1     | HIBCH     | 3-hydroxyisobutyryl-CoA hydrolase, mitochondrial             | 2.4e-04          | 1.3400                 |
| D6RE99     | HINT1     | Histidine triad nucleotide-binding protein 1                 | 0.0063           | 1.7528                 |
| O00291     | HIP1      | Huntingtin-interacting protein 1                             | 4.8e-05          | 1.2090                 |
| P19367     | HK1       | Hexokinase-1                                                 | 8.5e-07          | 0.5746                 |
| F8W6I7     | HNRNPA1   | Heterogeneous nuclear ribonucleoprotein A1                   | 2.0e-04          | 0.5125                 |
| P22626     | HNRNPA2B1 | Heterogeneous nuclear ribonucleoproteins A2/B1               | 1.5e-06          | 0.7282                 |
| B4DY08     | HNRNPC    | Heterogeneous nuclear ribonucleoproteins C1/C2               | 0.001            | 0.4409                 |
| P31942     | HNRNPH3   | Heterogeneous nuclear ribonucleoprotein H3                   | 0.0475           | 0.7922                 |
| P61978     | HNRNPK    | Heterogeneous nuclear ribonucleoprotein K                    | 2.1e-06          | 0.5579                 |
| P14866     | HNRNPL    | Heterogeneous nuclear ribonucleoprotein L                    | 1.1e-05          | 0.5927                 |
| Q8WVV9     | HNRNPLL   | Heterogeneous nuclear ribonucleoprotein L-like               | 0.0317           | 1.1729                 |
| Q86YM7     | HOMER1    | Homer protein homolog 1                                      | 5.5e-06          | -0.6333                |
| P84074     | HPCA      | Neuron-specific calcium-binding protein hippocalcin          | 0.0179           | 1.0503                 |
| P00492     | HPRT1     | Hypoxanthine-guanine phosphoribosyltransferase               | 1.0e-06          | 1.4829                 |
| O75506     | HSBP1     | Heat shock factor-binding protein 1                          | 0.0161           | -1.0979                |
| Q99714     | HSD17B10  | 3-hydroxyacyl-CoA dehydrogenase type-2                       | 0.0359           | 0.6958                 |
| Q8NBQ5     | HSD17B11  | Estradiol 17-beta-dehydrogenase 11                           | 0.0359           | -0.4976                |
| P51659     | HSD17B4   | Peroxisomal multifunctional enzyme type 2                    | 8.9e-11          | -0.8031                |
| Q6YN16     | HSDL2     | Hydroxysteroid dehydrogenase-like protein 2                  | 9.2e-06          | 0.8780                 |
| P07900     | HSP90AA1  | Heat shock protein HSP 90-alpha                              | 2.2e-16          | 0.7803                 |
| P08238     | HSP90AB1  | Heat shock protein HSP 90-beta                               | 2.1e-06          | 0.7504                 |
| P14625     | HSP90B1   | Endoplasmic                                                  | 2.1e-10          | 0.8587                 |
| Q0VDF9     | HSPA14    | Heat shock 70 kDa protein 14                                 | 0.0387           | -1.5659                |
| A0A0G2JIW1 | HSPA1B    | Heat shock 70 kDa protein 1B                                 | 8.4e-05          | 0.3263                 |
| P54652     | HSPA2     | Heat shock-related 70 kDa protein 2                          | 5.7e-07          | 0.4869                 |
| P34932     | HSPA4     | Heat shock 70 kDa protein 4                                  | 1.3e-14          | 0.8323                 |
| O95757     | HSPA4L    | Heat shock 70 kDa protein 4L                                 | 3.7e-05          | 0.4617                 |
| P11142     | HSPA8     | Heat shock cognate 71 kDa protein                            | 0.0174           | 0.1779                 |
| P38646     | HSPA9     | Stress-70 protein, mitochondrial                             | 2.7e-08          | 0.5411                 |
| P10809     | HSPD1     | 60 kDa heat shock protein, mitochondrial                     | 0.0052           | 0.3368                 |
| P61604     | HSPE1     | 10 kDa heat shock protein, mitochondrial                     | 1.4e-06          | 1.0908                 |
| Q92598     | HSPH1     | Heat shock protein 105 kDa                                   | 4.8e-05          | 0.6149                 |
| Q7Z6Z7     | HUWE1     | E3 ubiquitin-protein ligase HUWE1                            | 0.0116           | 0.3522                 |
| Q9Y4L1     | HYOU1     | Hypoxia up-regulated protein 1                               | 0.0248           | 0.2789                 |
| O75874     | IDH1      | Isocitrate dehydrogenase [NADP] cytoplasmic                  | 2.4e-05          | 0.8860                 |
| P48735     | IDH2      | Isocitrate dehydrogenase [NADP], mitochondrial               | 1.6e-06          | 0.8465                 |
| P50213     | IDH3A     | Isocitrate dehydrogenase [NAD] subunit alpha, mitochondrial  | 2.7e-06          | 1.1450                 |

Table S1: Significant differentially expressed proteins from children (*continued*)

| UniProtID | Gene Name | Description                                                           | Adjusted p-value | log2(A/C) |
|-----------|-----------|-----------------------------------------------------------------------|------------------|-----------|
| O43837    | IDH3B     | Isocitrate dehydrogenase [NAD] subunit beta, mitochondrial            | 0.0023           | 0.5502    |
| P78318    | IGBP1     | Immunoglobulin-binding protein 1                                      | 0.0099           | -0.6495   |
| Q96ID5    | IGSF21    | Immunoglobulin superfamily member 21                                  | 0.0131           | -0.4717   |
| Q969P0    | IGSF8     | Immunoglobulin superfamily member 8                                   | 0.0023           | -0.7464   |
| Q71H61    | ILDR2     | Immunoglobulin-like domain-containing receptor 2                      | 0.0213           | -1.1644   |
| Q16352    | INA       | Alpha-internexin                                                      | 0.0205           | 0.5948    |
| H0Y8C6    | IPO5      | Importin-5 (Fragment)                                                 | 0.0134           | 0.5367    |
| P46940    | IQGAP1    | Ras GTPase-activating-like protein IQGAP1                             | 0.0103           | 0.5884    |
| Q8WZA9    | IRGQ      | Immunity-related GTPase family Q protein                              | 5.4e-11          | 1.1299    |
| H3BMU1    | IST1      | IST1 homolog (Fragment)                                               | 6.9e-04          | -0.5664   |
| Q8WXH2    | JPH3      | Junctophilin-3                                                        | 0.0182           | -0.6562   |
| H7BXZ5    | KALRN     | Kalirin (Fragment)                                                    | 0.0098           | -0.5375   |
| O60268    | KIAA0513  | Uncharacterized protein KIAA0513                                      | 0.001            | 0.6974    |
| Q9HCM3    | KIAA1549  | UPF0606 protein KIAA1549                                              | 3.3e-04          | -0.7482   |
| Q6ZVL6    | KIAA1549L | UPF0606 protein KIAA1549L                                             | 9.6e-06          | -0.5539   |
| P33176    | KIF5B     | Kinesin-1 heavy chain                                                 | 1.7e-04          | 0.5303    |
| O60282    | KIF5C     | Kinesin heavy chain isoform 5C                                        | 1.2e-05          | 0.4668    |
| G3V3H3    | KLC1      | Kinesin light chain 1                                                 | 6.0e-12          | 0.7456    |
| Q76NI1    | KNDC1     | Kinase non-catalytic C-lobe domain-containing protein 1               | 1.6e-04          | -0.6440   |
| Q14974    | KPNB1     | Importin subunit beta-1                                               | 2.1e-04          | 0.6586    |
| P01116    | KRAS      | GTPase KRas                                                           | 7.1e-04          | 0.7627    |
| Q04695    | KRT17     | Keratin, type I cytoskeletal 17                                       | 0.0165           | 0.8326    |
| P04259    | KRT6B     | Keratin, type II cytoskeletal 6B                                      | 0.0017           | 0.6159    |
| Q86UP2    | KTN1      | Kinectin                                                              | 0.0077           | 0.3334    |
| P28838    | LAP3      | Cytosol aminopeptidase                                                | 1.3e-04          | 0.6763    |
| P00338    | LDHA      | L-lactate dehydrogenase A chain                                       | 2.2e-16          | 1.3462    |
| P07195    | LDHB      | L-lactate dehydrogenase B chain                                       | 2.2e-16          | 1.4732    |
| P09382    | LGALS1    | Galectin-1                                                            | 1.2e-04          | 0.8178    |
| Q3ZCW2    | LGALSL    | Galectin-related protein                                              | 0.006            | 1.8083    |
| O95970    | LGI1      | Leucine-rich glioma-inactivated protein 1                             | 1.2e-08          | -0.6458   |
| Q03252    | LMNB2     | Lamin-B2                                                              | 0.0026           | 0.5375    |
| Q5VUJ6    | LRCH2     | Leucine-rich repeat and calponin homology domain-containing protein 2 | 0.0308           | -1.3853   |
| P30533    | LRPAP1    | Alpha-2-macroglobulin receptor-associated protein                     | 0.0411           | 0.5627    |
| Q8N1G4    | LRRC47    | Leucine-rich repeat-containing protein 47                             | 0.0058           | 0.5006    |
| Q8IUZ0    | LRRC49    | Leucine-rich repeat-containing protein 49                             | 0.0449           | -1.0630   |
| Q96NW7    | LRRC7     | Leucine-rich repeat-containing protein 7                              | 0.0415           | -0.6716   |
| Q9Y608    | LRRFIP2   | Leucine-rich repeat flightless-interacting protein 2                  | 0.0294           | -0.5733   |
| Q9NQ48    | LZTFL1    | Leucine zipper transcription factor-like protein 1                    | 8.1e-06          | 0.7072    |
| E9PGC8    | MAP1A     | Microtubule-associated protein 1A                                     | 2.9e-04          | 0.2225    |
| Q02750    | MAP2K1    | Dual specificity mitogen-activated protein kinase 1                   | 5.6e-04          | 0.9659    |
| Q96T17    | MAP7D2    | MAP7 domain-containing protein 2                                      | 0.0059           | 0.6273    |
| P28482    | MAPK1     | Mitogen-activated protein kinase 1                                    | 3.7e-13          | 0.8053    |

Table S1: Significant differentially expressed proteins from children (*continued*)

| UniProtID  | Gene Name | Description                                                          | Adjusted p-value | log2(A/C) |
|------------|-----------|----------------------------------------------------------------------|------------------|-----------|
| P27361     | MAPK3     | Mitogen-activated protein kinase 3                                   | 0.0029           | 0.6272    |
| Q9UPY8     | MAPRE3    | Microtubule-associated protein RP/EB family member 3                 | 4.3e-05          | 0.7721    |
| A0A0G2JQJ7 | MAPT      | Microtubule-associated protein                                       | 3.7e-04          | 0.3749    |
| P29966     | MARCKS    | Myristoylated alanine-rich C-kinase substrate                        | 1.2e-06          | 1.3507    |
| P49006     | MARCKSL1  | MARCKS-related protein                                               | 7.3e-04          | 1.4762    |
| P31153     | MAT2A     | S-adenosylmethionine synthase isoform type-2                         | 0.0229           | 0.6730    |
| Q68D91     | MBLAC2    | Metallo-beta-lactamase domain-containing protein 2                   | 0.0436           | 0.6348    |
| P02686     | MBP       | Myelin basic protein                                                 | 0.0354           | 0.4434    |
| J3QKL5     | MBP       | Myelin basic protein (Fragment)                                      | 0.0354           | 0.4434    |
| H7BYR8     | MBP       | Myelin basic protein                                                 | 0.0354           | 0.4434    |
| Q8IVS2     | MCAT      | Malonyl-CoA-acyl carrier protein transacylase, mitochondrial         | 0.0283           | -0.6718   |
| P40925     | MDH1      | Malate dehydrogenase, cytoplasmic                                    | 2.2e-16          | 1.3951    |
| P48163     | ME1       | NADP-dependent malic enzyme                                          | 0.0014           | 1.0747    |
| E9PD12     | MIB2      | E3 ubiquitin-protein ligase MIB2                                     | 0.0378           | -0.8084   |
| Q8TDZ2     | MICAL1    | [F-actin]-monooxygenase MICAL1                                       | 0.01             | -0.5245   |
| Q5R3B4     | MPC2      | Mitochondrial pyruvate carrier (Fragment)                            | 0.0067           | -0.8922   |
| A0A494BZV2 | MPRIIP    | Myosin phosphatase Rho-interacting protein                           | 0.023            | -0.2988   |
| P82650     | MRPS22    | 28S ribosomal protein S22, mitochondrial                             | 0.0469           | -0.7190   |
| P26038     | MSN       | Moesin                                                               | 3.4e-04          | 0.7077    |
| P58546     | MTPN      | Myotrophin                                                           | 2.2e-04          | 1.9371    |
| Q14764     | MVP       | Major vault protein                                                  | 0.0213           | 0.7537    |
| P35580     | MYH10     | Myosin-10                                                            | 4.3e-16          | -0.5951   |
| P35579     | MYH9      | Myosin-9                                                             | 1.1e-12          | -0.5082   |
| O14950     | MYL12B    | Myosin regulatory light chain 12B                                    | 3.8e-04          | -1.0113   |
| B7Z6Z4     | MYL6      | Myosin light polypeptide 6                                           | 1.2e-07          | -0.7508   |
| P14649     | MYL6B     | Myosin light chain 6B                                                | 7.6e-10          | -1.2849   |
| P24844     | MYL9      | Myosin regulatory light polypeptide 9                                | 4.8e-05          | -0.8652   |
| E9PDF6     | MYO1B     | Unconventional myosin-Ib                                             | 0.0319           | -0.3927   |
| Q9Y4I1     | MYO5A     | Unconventional myosin-Va                                             | 7.1e-05          | -0.2635   |
| Q9BXJ9     | NAA15     | N-alpha-acetyltransferase 15, NatA auxiliary subunit                 | 0.014            | 0.5643    |
| Q99747     | NAPG      | Gamma-soluble NSF attachment protein                                 | 0.006            | 0.3627    |
| P61601     | NCALD     | Neurocalcin-delta                                                    | 1.6e-05          | 1.6642    |
| Q9UBB6     | NCDN      | Neurochondrin                                                        | 9.7e-05          | 1.1409    |
| Q9Y2A7     | NCKAP1    | Nck-associated protein 1                                             | 0.0017           | -0.1779   |
| Q9GZM8     | NDEL1     | Nuclear distribution protein nudE-like 1                             | 0.011            | -0.4689   |
| P28331     | NDUFS1    | NADH-ubiquinone oxidoreductase 75 kDa subunit, mitochondrial         | 0.0065           | -0.5312   |
| O43181     | NDUFS4    | NADH dehydrogenase [ubiquinone] iron-sulfur protein 4, mitochondrial | 0.0278           | -0.9967   |
| P07196     | NEFL      | Neurofilament light polypeptide                                      | 0.0119           | 0.5945    |
| E7ESP9     | NEFM      | Neurofilament medium polypeptide                                     | 0.0016           | 0.4659    |
| Q7Z3B1     | NEGR1     | Neuronal growth regulator 1                                          | 4.4e-08          | -0.7633   |
| P21359     | NF1       | Neurofibromin                                                        | 0.0014           | -0.4288   |
| P51513     | NOVA1     | RNA-binding protein Nova-1                                           | 0.0251           | 0.3899    |

Table S1: Significant differentially expressed proteins from children (*continued*)

| UniProtID  | Gene Name | Description                                                                        | Adjusted p-value | log <sub>2</sub> (A/C) |
|------------|-----------|------------------------------------------------------------------------------------|------------------|------------------------|
| Q9UNW9     | NOVA2     | RNA-binding protein Nova-2                                                         | 0.0392           | 0.5188                 |
| E9PLK3     | NPEPPS    | Aminopeptidase                                                                     | 1.1e-15          | 1.2965                 |
| Q8TAT6     | NPLOC4    | Nuclear protein localization protein 4 homolog                                     | 0.0014           | 0.6183                 |
| Q92686     | NRGN      | Neurogranin                                                                        | 0.013            | 1.3373                 |
| A0A1D5RMU6 | NRXN1     | Neurexin-1-beta                                                                    | 0.0013           | -0.5882                |
| P46459     | NSF       | Vesicle-fusing ATPase                                                              | 0.0164           | -0.2263                |
| Q9UNZ2     | NSFL1C    | NSFL1 cofactor p47                                                                 | 0.0067           | 0.7284                 |
| Q9Y266     | NUDC      | Nuclear migration protein nudC                                                     | 0.0015           | 0.5723                 |
| Q8WVJ2     | NUDCD2    | NudC domain-containing protein 2                                                   | 0.0487           | 1.2863                 |
| A0A024RBG1 | NUDT4B    | Diphosphoinositol polyphosphate phosphohydrolase<br>NUDT4B                         | 0.0223           | -0.9628                |
| O15294     | OGT       | UDP-N-acetylglucosamine-peptide<br>N-acetylglucosaminyltransferase 110 kDa subunit | 2.5e-06          | -0.7883                |
| Q9NTK5     | OLA1      | Obg-like ATPase 1                                                                  | 2.9e-11          | 1.2373                 |
| Q99784     | OLFM1     | Noelin                                                                             | 2.2e-04          | -0.5602                |
| O95897     | OLFM2     | Noelin-2                                                                           | 2.6e-08          | -0.7902                |
| Q96PB7     | OLFM3     | Noelin-3                                                                           | 1.7e-07          | -0.7895                |
| O60313     | OPA1      | Dynamin-like 120 kDa protein, mitochondrial                                        | 0.0227           | 0.4303                 |
| P22059     | OSBP      | Oxysterol-binding protein 1                                                        | 0.0278           | 0.5000                 |
| Q9BXW6     | OSBPL1A   | Oxysterol-binding protein-related protein 1                                        | 0.0305           | 2.0563                 |
| J3KR44     | OTUB1     | Ubiquitin thioesterase                                                             | 0.0249           | 1.1216                 |
| P55809     | OXCT1     | Succinyl-CoA:3-ketoacid coenzyme A transferase 1,<br>mitochondrial                 | 5.4e-10          | 0.9385                 |
| Q8N573     | OXR1      | Oxidation resistance protein 1                                                     | 1.0e-12          | 0.6514                 |
| P07237     | P4HB      | Protein disulfide-isomerase                                                        | 0.0082           | 0.3245                 |
| Q9Y2J8     | PADI2     | Protein-arginine deiminase type-2                                                  | 4.2e-04          | 1.2187                 |
| P43034     | PAFAH1B1  | Platelet-activating factor acetylhydrolase IB subunit<br>alpha                     | 5.9e-06          | 0.8309                 |
| D6REB4     | PAIP1     | Polyadenylate-binding protein-interacting protein 1                                | 0.0087           | 0.6909                 |
| Q13153     | PAK1      | Serine/threonine-protein kinase PAK 1                                              | 1.2e-04          | 0.6223                 |
| Q13177     | PAK2      | Serine/threonine-protein kinase PAK 2                                              | 3.6e-06          | 1.1189                 |
| O75914     | PAK3      | Serine/threonine-protein kinase PAK 3                                              | 7.1e-14          | 0.8833                 |
| O96013     | PAK4      | Serine/threonine-protein kinase PAK 4                                              | 0.0118           | 0.6463                 |
| K7ELW0     | PARK7     | Protein/nucleic acid deglycase DJ-1                                                | 0.0401           | 1.2756                 |
| P09874     | PARP1     | Poly [ADP-ribose] polymerase 1                                                     | 5.7e-04          | 0.4669                 |
| E9PFP8     | PCBP3     | Poly(rC)-binding protein 3                                                         | 5.1e-05          | 0.5823                 |
| P05165     | PCCA      | Propionyl-CoA carboxylase alpha chain,<br>mitochondrial                            | 0.0439           | 0.5643                 |
| Q9Y6V0     | PCLO      | Protein piccolo                                                                    | 1.0e-04          | -0.2757                |
| I3L1R7     | PCYT2     | Ethanolamine-phosphate cytidyltransferase                                          | 0.0119           | 0.8360                 |
| Q8WUM4     | PDCD6IP   | Programmed cell death 6-interacting protein                                        | 2.2e-16          | 1.0846                 |
| Q14123     | PDE1C     | Calcium/calmodulin-dependent 3',5'-cyclic nucleotide<br>phosphodiesterase 1C       | 0.0351           | 0.8568                 |
| O00408     | PDE2A     | cGMP-dependent 3',5'-cyclic phosphodiesterase                                      | 0.0036           | 0.3824                 |
| Q07343     | PDE4B     | cAMP-specific 3',5'-cyclic phosphodiesterase 4B                                    | 0.03             | 1.1814                 |



Table S1: Significant differentially expressed proteins from children (*continued*)

| UniProtID  | Gene Name | Description                                                                    | Adjusted p-value | log <sub>2</sub> (A/C) |
|------------|-----------|--------------------------------------------------------------------------------|------------------|------------------------|
| P08559     | PDHA1     | Pyruvate dehydrogenase E1 component subunit alpha, somatic form, mitochondrial | 5.0e-05          | 0.5964                 |
| P11177     | PDHB      | Pyruvate dehydrogenase E1 component subunit beta, mitochondrial                | 8.2e-10          | 0.9769                 |
| O00330     | PDHX      | Pyruvate dehydrogenase protein X component, mitochondrial                      | 1.1e-05          | 0.8427                 |
| P30101     | PDIA3     | Protein disulfide-isomerase A3                                                 | 4.7e-08          | 0.8709                 |
| Q96GD0     | PDXP      | Pyridoxal phosphate phosphatase                                                | 0.0084           | 2.4754                 |
| Q15121     | PEA15     | Astrocytic phosphoprotein PEA-15                                               | 3.4e-05          | 1.5788                 |
| P30086     | PEBP1     | Phosphatidylethanolamine-binding protein 1                                     | 1.7e-07          | 1.5887                 |
| P17858     | PFKL      | ATP-dependent 6-phosphofructokinase, liver type                                | 0.0037           | 0.6427                 |
| P08237     | PFKM      | ATP-dependent 6-phosphofructokinase, muscle type                               | 4.2e-12          | 0.9579                 |
| P07737     | PFN1      | Profilin-1                                                                     | 1.1e-08          | 1.4517                 |
| C9J0J7     | PFN2      | Profilin                                                                       | 0.0022           | 0.4865                 |
| P35080     | PFN2      | Profilin-2                                                                     | 0.0022           | 0.4865                 |
| P18669     | PGAM1     | Phosphoglycerate mutase 1                                                      | 9.8e-08          | 1.0096                 |
| Q96HS1     | PGAM5     | Serine/threonine-protein phosphatase PGAM5, mitochondrial                      | 0.004            | -0.6462                |
| P52209     | PGD       | 6-phosphogluconate dehydrogenase, decarboxylating                              | 6.6e-09          | 1.2192                 |
| P00558     | PGK1      | Phosphoglycerate kinase 1                                                      | 2.2e-16          | 1.4977                 |
| O95336     | PGLS      | 6-phosphogluconolactonase                                                      | 0.0067           | 1.1396                 |
| A0A3B3ITK7 | PGM1      | Phosphoglucomutase-1                                                           | 2.6e-04          | 1.8161                 |
| Q6PCE3     | PGM2L1    | Glucose 1,6-bisphosphate synthase                                              | 3.7e-06          | 1.4777                 |
| O43175     | PHGDH     | D-3-phosphoglycerate dehydrogenase                                             | 1.7e-11          | 1.1826                 |
| Q9NRX4     | PHPT1     | 14 kDa phosphohistidine phosphatase                                            | 0.0043           | 1.3934                 |
| Q96FC7     | PHYHIPL   | Phytanoyl-CoA hydroxylase-interacting protein-like                             | 2.2e-07          | 0.8832                 |
| P42356     | PI4KA     | Phosphatidylinositol 4-kinase alpha                                            | 7.9e-04          | -0.3180                |
| Q13492     | PICALM    | Phosphatidylinositol-binding clathrin assembly protein                         | 0.013            | 0.3726                 |
| Q8TBX8     | PIP4K2C   | Phosphatidylinositol 5-phosphate 4-kinase type-2 gamma                         | 0.0174           | -0.5791                |
| Q9GZP4     | PITHD1    | PITH domain-containing protein 1                                               | 0.0068           | 0.8400                 |
| H3BR70     | PKM       | Pyruvate kinase                                                                | 2.2e-16          | 1.4135                 |
| P14618     | PKM       | Pyruvate kinase PKM                                                            | 2.2e-16          | 1.4135                 |
| Q9NQ66     | PLCB1     | 1-phosphatidylinositol 4,5-bisphosphate phosphodiesterase beta-1               | 2.2e-16          | 0.6577                 |
| H3BUD4     | PLCL1     | Phosphoinositide phospholipase C (Fragment)                                    | 0.0027           | 1.0297                 |
| A0A0A0MSQ0 | PLS3      | Plastin-3                                                                      | 7.2e-04          | 0.7657                 |
| Q9H2U2     | PPA2      | Inorganic pyrophosphatase 2, mitochondrial                                     | 0.0434           | 0.9289                 |
| Q08752     | PPID      | Peptidyl-prolyl cis-trans isomerase D                                          | 0.0359           | 0.5620                 |
| Q9Y3C6     | PPIL1     | Peptidyl-prolyl cis-trans isomerase-like 1                                     | 0.0109           | 0.9798                 |
| O75688     | PPM1B     | Protein phosphatase 1B                                                         | 0.0061           | 0.9997                 |
| Q9Y570     | PPME1     | Protein phosphatase methylesterase 1                                           | 2.5e-04          | 1.1420                 |
| A0A3B3ISJ2 | PPP1R13B  | Apoptosis-stimulating of p53 protein 1 (Fragment)                              | 0.0413           | -0.4739                |
| Q6ZMI0     | PPP1R21   | Protein phosphatase 1 regulatory subunit 21                                    | 0.0055           | 0.3583                 |
| Q15435     | PPP1R7    | Protein phosphatase 1 regulatory subunit 7                                     | 3.5e-06          | 0.7001                 |

Table S1: Significant differentially expressed proteins from children (*continued*)

| UniProtID | Gene Name | Description                                                                       | Adjusted p-value | log2(A/C) |
|-----------|-----------|-----------------------------------------------------------------------------------|------------------|-----------|
| Q9ULJ8    | PPP1R9A   | Neurabin-1                                                                        | 0.0044           | -0.5881   |
| Q96SB3    | PPP1R9B   | Neurabin-2                                                                        | 1.1e-05          | -0.7123   |
| P30153    | PPP2R1A   | Serine/threonine-protein phosphatase 2A 65 kDa regulatory subunit A alpha isoform | 6.8e-11          | 0.5774    |
| P63151    | PPP2R2A   | Serine/threonine-protein phosphatase 2A 55 kDa regulatory subunit B alpha isoform | 0.0246           | 0.6618    |
| Q08209    | PPP3CA    | Serine/threonine-protein phosphatase 2B catalytic subunit alpha isoform           | 6.3e-10          | 0.9513    |
| P16298    | PPP3CB    | Serine/threonine-protein phosphatase 2B catalytic subunit beta isoform            | 1.7e-05          | 0.6529    |
| F6U1T9    | PPP3R1    | Calcineurin subunit B type 1                                                      | 0.0415           | 0.7660    |
| H0YDU8    | PPP5C     | Serine/threonine-protein phosphatase (Fragment)                                   | 1.2e-04          | 0.5729    |
| P32119    | PRDX2     | Peroxiredoxin-2                                                                   | 2.0e-05          | 0.6484    |
| P30044    | PRDX5     | Peroxiredoxin-5, mitochondrial                                                    | 1.9e-04          | 1.1255    |
| P30041    | PRDX6     | Peroxiredoxin-6                                                                   | 9.2e-10          | 1.5580    |
| P48147    | PREP      | Prolyl endopeptidase                                                              | 1.8e-05          | 1.2246    |
| P13861    | PRKAR2A   | cAMP-dependent protein kinase type II-alpha regulatory subunit                    | 0.0143           | 0.3222    |
| P78527    | PRKDC     | DNA-dependent protein kinase catalytic subunit                                    | 0.0012           | -0.2147   |
| O14744    | PRMT5     | Protein arginine N-methyltransferase 5                                            | 0.0139           | 0.5118    |
| P11908    | PRPS2     | Ribose-phosphate pyrophosphokinase 2                                              | 0.0077           | 0.7856    |
| Q9Y617    | PSAT1     | Phosphoserine aminotransferase                                                    | 1.6e-07          | 1.6974    |
| B4DKF8    | PSD3      | PH and SEC7 domain-containing protein 3                                           | 0.0295           | -0.1659   |
| E5RJ29    | PSD3      | PH and SEC7 domain-containing protein 3                                           | 0.0295           | -0.1659   |
| P25786    | PSMA1     | Proteasome subunit alpha type-1                                                   | 1.1e-04          | 0.7963    |
| P25787    | PSMA2     | Proteasome subunit alpha type-2                                                   | 0.0434           | 0.9824    |
| P25788    | PSMA3     | Proteasome subunit alpha type-3                                                   | 3.3e-04          | 0.6898    |
| P25789    | PSMA4     | Proteasome subunit alpha type-4                                                   | 0.0071           | 0.7406    |
| P28066    | PSMA5     | Proteasome subunit alpha type-5                                                   | 6.1e-04          | 0.9630    |
| P60900    | PSMA6     | Proteasome subunit alpha type-6                                                   | 0.0271           | 0.5458    |
| O14818    | PSMA7     | Proteasome subunit alpha type-7                                                   | 2.4e-04          | 0.6850    |
| P28074    | PSMB5     | Proteasome subunit beta type-5                                                    | 1.2e-05          | 1.0689    |
| P28072    | PSMB6     | Proteasome subunit beta type-6                                                    | 0.0393           | 0.9785    |
| P62191    | PSMC1     | 26S proteasome regulatory subunit 4                                               | 0.0159           | 0.3634    |
| P35998    | PSMC2     | 26S proteasome regulatory subunit 7                                               | 7.7e-05          | 0.5075    |
| P62195    | PSMC5     | 26S proteasome regulatory subunit 8                                               | 4.1e-05          | 0.5752    |
| Q06323    | PSME1     | Proteasome activator complex subunit 1                                            | 0.0087           | 0.8923    |
| H0YM70    | PSME2     | Proteasome activator complex subunit 2                                            | 0.0261           | 0.7410    |
| A6NLN1    | PTBP1     | Polypyrimidine tract binding protein 1, isoform CRA_b                             | 0.0049           | 0.4299    |
| Q14914    | PTGR1     | Prostaglandin reductase 1                                                         | 1.2e-05          | 1.2818    |
| Q15257    | PTPA      | Serine/threonine-protein phosphatase 2A activator                                 | 9.4e-04          | 1.3407    |
| Q06124    | PTPN11    | Tyrosine-protein phosphatase non-receptor type 11                                 | 0.0015           | 1.2156    |
| Q9H3S7    | PTPN23    | Tyrosine-protein phosphatase non-receptor type 23                                 | 0.006            | 0.5115    |
| Q15262    | PTPRK     | Receptor-type tyrosine-protein phosphatase kappa                                  | 0.0084           | -0.7636   |
| P11216    | PYGB      | Glycogen phosphorylase, brain form                                                | 3.0e-04          | 0.5311    |

Table S1: Significant differentially expressed proteins from children (*continued*)

| UniProtID  | Gene Name | Description                                       | Adjusted p-value | log <sub>2</sub> (A/C) |
|------------|-----------|---------------------------------------------------|------------------|------------------------|
| P11217     | PYGM      | Glycogen phosphorylase, muscle form               | 4.8e-05          | 0.7657                 |
| Q15907     | RAB11B    | Ras-related protein Rab-11B                       | 3.0e-09          | 1.3314                 |
| X6RFL8     | RAB14     | Ras-related protein Rab-14 (Fragment)             | 1.3e-06          | 0.7031                 |
| P62820     | RAB1A     | Ras-related protein Rab-1A                        | 6.4e-04          | 0.8045                 |
| P61019     | RAB2A     | Ras-related protein Rab-2A                        | 4.5e-05          | 0.6631                 |
| Q15286     | RAB35     | Ras-related protein Rab-35                        | 0.0445           | 0.4481                 |
| P20336     | RAB3A     | Ras-related protein Rab-3A                        | 9.5e-06          | 1.4240                 |
| Q96E17     | RAB3C     | Ras-related protein Rab-3C                        | 0.018            | 0.9340                 |
| P61020     | RAB5B     | Ras-related protein Rab-5B                        | 0.0125           | 0.8557                 |
| P51148     | RAB5C     | Ras-related protein Rab-5C                        | 8.2e-04          | 1.2839                 |
| Q9NRW1     | RAB6B     | Ras-related protein Rab-6B                        | 0.0096           | 0.6586                 |
| P51149     | RAB7A     | Ras-related protein Rab-7a                        | 2.4e-05          | 0.9885                 |
| Q15276     | RABEP1    | Rab GTPase-binding effector protein 1             | 0.0351           | 0.2753                 |
| Q3YEC7     | RABL6     | Rab-like protein 6                                | 0.013            | 0.5374                 |
| P54727     | RAD23B    | UV excision repair protein RAD23 homolog B        | 6.9e-04          | 0.9441                 |
| P11233     | RALA      | Ras-related protein Ral-A                         | 8.5e-09          | 0.7430                 |
| B5MDF5     | RAN       | GTP-binding nuclear protein Ran                   | 2.0e-06          | 1.0514                 |
| P46060     | RANGAP1   | Ran GTPase-activating protein 1                   | 0.0049           | 0.5267                 |
| P62834     | RAP1A     | Ras-related protein Rap-1A                        | 2.0e-04          | 1.4620                 |
| P52306     | RAP1GDS1  | Rap1 GTPase-GDP dissociation stimulator 1         | 9.5e-08          | 0.7938                 |
| A0A2R8YGD3 | RAPGEF2   | Rap guanine nucleotide exchange factor 2          | 0.0424           | 0.3837                 |
| Q8WZA2     | RAPGEF4   | Rap guanine nucleotide exchange factor 4          | 0.0022           | -0.6817                |
| Q9UJF2     | RASAL2    | Ras GTPase-activating protein nGAP                | 0.0265           | -0.5217                |
| Q8TDY2     | RB1CC1    | RB1-inducible coiled-coil protein 1               | 0.0169           | -0.4971                |
| Q15293     | RCN1      | Reticulocalbin-1                                  | 0.0496           | 0.5883                 |
| Q9HBH5     | RDH14     | Retinol dehydrogenase 14                          | 0.0213           | 0.5756                 |
| A0A2R8Y5S7 | RDX       | Radixin                                           | 1.1e-04          | 0.3469                 |
| Q00765     | REEP5     | Receptor expression-enhancing protein 5           | 0.004            | 0.9097                 |
| Q8NFB8     | REPS2     | RalBP1-associated Eps domain-containing protein 2 | 0.0237           | 0.3497                 |
| P49758     | RGS6      | Regulator of G-protein signaling 6                | 0.0036           | 1.0011                 |
| P52758     | RIDA      | 2-iminobutanoate/2-iminopropanoate deaminase      | 0.0094           | 1.5022                 |
| Q9UJD0     | RIMS3     | Regulating synaptic membrane exocytosis protein 3 | 0.0366           | 0.6499                 |
| P13489     | RNH1      | Ribonuclease inhibitor                            | 0.0021           | 1.2510                 |
| O75116     | ROCK2     | Rho-associated protein kinase 2                   | 2.0e-09          | 0.6575                 |
| P84098     | RPL19     | 60S ribosomal protein L19                         | 0.034            | -0.6746                |
| P62750     | RPL23A    | 60S ribosomal protein L23a                        | 2.1e-04          | -0.6117                |
| P61353     | RPL27     | 60S ribosomal protein L27                         | 0.0279           | -0.8298                |
| E9PLL6     | RPL27A    | 60S ribosomal protein L27a                        | 0.0229           | -0.8620                |
| P39023     | RPL3      | 60S ribosomal protein L3                          | 0.0159           | -0.3648                |
| H7C2W9     | RPL31     | 60S ribosomal protein L31 (Fragment)              | 9.3e-04          | -0.9350                |
| Q9Y3U8     | RPL36     | 60S ribosomal protein L36                         | 0.0336           | -0.9574                |
| P36578     | RPL4      | 60S ribosomal protein L4                          | 0.0194           | -0.4762                |
| Q02878     | RPL6      | 60S ribosomal protein L6                          | 0.0256           | -0.3917                |
| P18124     | RPL7      | 60S ribosomal protein L7                          | 0.0153           | -0.4298                |
| P62424     | RPL7A     | 60S ribosomal protein L7a                         | 0.0305           | -0.4556                |
| P05388     | RPLP0     | 60S acidic ribosomal protein P0                   | 5.8e-05          | -0.6536                |

Table S1: Significant differentially expressed proteins from children (*continued*)

| UniProtID  | Gene Name | Description                                                            | Adjusted p-value | log <sub>2</sub> (A/C) |
|------------|-----------|------------------------------------------------------------------------|------------------|------------------------|
| P05387     | RPLP2     | 60S acidic ribosomal protein P2                                        | 9.3e-04          | -0.9447                |
| P39019     | RPS19     | 40S ribosomal protein S19                                              | 2.3e-04          | -0.5096                |
| P60866     | RPS20     | 40S ribosomal protein S20                                              | 0.0457           | -0.5597                |
| P61247     | RPS3A     | 40S ribosomal protein S3a                                              | 0.0127           | -0.3852                |
| Q8N122     | RPTOR     | Regulatory-associated protein of mTOR                                  | 0.0109           | 0.5457                 |
| Q9Y3I0     | RTCB      | tRNA-splicing ligase RtcB homolog                                      | 0.0055           | 0.2872                 |
| Q16799     | RTN1      | Reticulon-1                                                            | 0.0197           | 0.6256                 |
| O95197     | RTN3      | Reticulon-3                                                            | 0.005            | 0.3759                 |
| Q9NQC3     | RTN4      | Reticulon-4                                                            | 1.4e-06          | 0.4792                 |
| Q59EK9     | RUNDC3A   | RUN domain-containing protein 3A                                       | 0.0209           | 0.9482                 |
| Q99584     | S100A13   | Protein S100-A13                                                       | 0.0025           | 0.9231                 |
| Q9NZJ4     | SACS      | Sacsin                                                                 | 5.4e-08          | -0.6349                |
| Q9Y3A5     | SBDS      | Ribosome maturation protein SBDS                                       | 0.0021           | 0.5310                 |
| Q8NBX0     | SCCPDH    | Saccharopine dehydrogenase-like oxidoreductase                         | 2.5e-04          | -0.9698                |
| Q8WVM8     | SCFD1     | Sec1 family domain-containing protein 1                                | 4.9e-04          | 0.6164                 |
| Q12765     | SCRN1     | Secernin-1                                                             | 2.2e-04          | 1.1851                 |
| Q96GA7     | SDSL      | Serine dehydratase-like                                                | 0.0309           | 0.8458                 |
| O75396     | SEC22B    | Vesicle-trafficking protein SEC22b                                     | 0.0265           | 0.4947                 |
| F5H365     | SEC23A    | Protein transport protein SEC23                                        | 0.0434           | 0.7227                 |
| Q13228     | SELENBP1  | Methanethiol oxidase                                                   | 2.1e-06          | 1.6758                 |
| A0A2R8Y4H2 | SEPTIN3   | Septin 3                                                               | 1.8e-06          | -0.5856                |
| G3XAH0     | SEPTIN5   | HCG2002594, isoform CRA_c                                              | 0.003            | -0.3591                |
| Q99719     | SEPTIN5   | Septin-5                                                               | 0.003            | -0.3591                |
| Q14141     | SEPTIN6   | Septin-6                                                               | 2.9e-07          | -0.6284                |
| Q16181     | SEPTIN7   | Septin-7                                                               | 1.5e-04          | -0.3240                |
| Q92599     | SEPTIN8   | Septin-8                                                               | 2.1e-08          | -0.5467                |
| Q9UHD8     | SEPTIN9   | Septin-9                                                               | 6.9e-04          | -0.4038                |
| A0A024R6I7 | SERPINA1  | Alpha-1-antitrypsin                                                    | 0.0399           | 0.8116                 |
| P30740     | SERPINB1  | Leukocyte elastase inhibitor                                           | 0.0401           | 0.7949                 |
| P36955     | SERPINF1  | Pigment epithelium-derived factor                                      | 0.0063           | 0.8041                 |
| P23246     | SFPQ      | Splicing factor, proline- and glutamine-rich                           | 0.0456           | -0.3701                |
| O43765     | SGTA      | Small glutamine-rich tetratricopeptide repeat-containing protein alpha | 0.001            | 0.7574                 |
| Q96EQ0     | SGTB      | Small glutamine-rich tetratricopeptide repeat-containing protein beta  | 0.0384           | 0.6582                 |
| Q9UJC5     | SH3BGRL2  | SH3 domain-binding glutamic acid-rich-like protein 2                   | 0.0029           | -0.9433                |
| Q99961     | SH3GL1    | Endophilin-A2                                                          | 2.2e-16          | 1.0444                 |
| Q99962     | SH3GL2    | Endophilin-A1                                                          | 7.7e-11          | 0.8321                 |
| Q99963     | SH3GL3    | Endophilin-A3                                                          | 6.3e-12          | 1.0671                 |
| Q96B97     | SH3KBP1   | SH3 domain-containing kinase-binding protein 1                         | 1.9e-04          | -0.4669                |
| Q5TCZ1     | SH3PXD2A  | SH3 and PX domain-containing protein 2A                                | 0.0035           | -0.5390                |
| Q9Y566     | SHANK1    | SH3 and multiple ankyrin repeat domains protein 1                      | 0.0029           | -0.6396                |
| Q9UPX8     | SHANK2    | SH3 and multiple ankyrin repeat domains protein 2                      | 1.1e-04          | -0.6733                |
| Q9BYB0     | SHANK3    | SH3 and multiple ankyrin repeat domains protein 3                      | 5.9e-05          | -0.7989                |
| A0MZ66     | SHTN1     | Shootin-1                                                              | 0.0107           | 0.5143                 |
| A0A087WYM3 | SIRT2     | NAD-dependent protein deacetylase                                      | 0.0213           | 0.9633                 |

Table S1: Significant differentially expressed proteins from children (*continued*)

| UniProtID  | Gene Name | Description                                           | Adjusted p-value | log <sub>2</sub> (A/C) |
|------------|-----------|-------------------------------------------------------|------------------|------------------------|
| E5RJR5     | SKP1      | S-phase kinase-associated protein 1                   | 0.0279           | -0.3440                |
| P55011     | SLC12A2   | Solute carrier family 12 member 2                     | 0.0036           | 0.4765                 |
| Q02978     | SLC25A11  | Mitochondrial 2-oxoglutarate/malate carrier protein   | 4.1e-04          | -0.9781                |
| O75746     | SLC25A12  | Calcium-binding mitochondrial carrier protein Aralar1 | 0.0237           | -0.5925                |
| E9PJH7     | SLC25A22  | Mitochondrial glutamate carrier 1 (Fragment)          | 5.2e-04          | -1.0657                |
| Q00325     | SLC25A3   | Phosphate carrier protein, mitochondrial              | 4.0e-07          | -1.1105                |
| P12235     | SLC25A4   | ADP/ATP translocase 1                                 | 0.0095           | -1.3297                |
| Q96AG3     | SLC25A46  | Solute carrier family 25 member 46                    | 0.0243           | -0.6210                |
| P12236     | SLC25A6   | ADP/ATP translocase 3                                 | 8.9e-06          | -0.9785                |
| Q9H2G2     | SLK       | STE20-like serine/threonine-protein kinase            | 0.0182           | 0.2757                 |
| Q8IYB5     | SMAP1     | Stromal membrane-associated protein 1                 | 0.0447           | 0.5079                 |
| O60641     | SNAP91    | Clathrin coat assembly protein AP180                  | 7.6e-07          | 0.6429                 |
| E7EPV7     | SNCA      | Alpha-synuclein                                       | 5.6e-13          | 1.6297                 |
| Q16143     | SNCB      | Beta-synuclein                                        | 7.7e-11          | 1.5759                 |
| O76070     | SNCG      | Gamma-synuclein                                       | 1.1e-04          | 1.1300                 |
| P08621     | SNRNP70   | U1 small nuclear ribonucleoprotein 70 kDa             | 0.0095           | 1.3711                 |
| P09012     | SNRPA     | U1 small nuclear ribonucleoprotein A                  | 0.0345           | 0.7952                 |
| Q13596     | SNX1      | Sorting nexin-1                                       | 2.1e-05          | 0.7093                 |
| Q15036     | SNX17     | Sorting nexin-17                                      | 0.0273           | -0.5856                |
| Q96RF0     | SNX18     | Sorting nexin-18                                      | 9.8e-04          | -0.6815                |
| O60749     | SNX2      | Sorting nexin-2                                       | 0.0024           | 0.5892                 |
| Q9UNH7     | SNX6      | Sorting nexin-6                                       | 7.9e-04          | 0.7295                 |
| P04179     | SOD2      | Superoxide dismutase [Mn], mitochondrial              | 1.1e-04          | 1.0118                 |
| E9PJP2     | SOGA3     | Protein SOGA3                                         | 4.0e-07          | 0.6744                 |
| Q9BX66     | SORBS1    | Sorbin and SH3 domain-containing protein 1            | 1.3e-04          | -0.6790                |
| P02549     | SPTA1     | Spectrin alpha chain, erythrocytic 1                  | 1.8e-10          | -0.8842                |
| A0A0D9SGF6 | SPTAN1    | Spectrin alpha chain, non-erythrocytic 1              | 2.2e-16          | -0.7423                |
| P11277     | SPTB      | Spectrin beta chain, erythrocytic                     | 1.0e-08          | -0.6246                |
| Q01082     | SPTBN1    | Spectrin beta chain, non-erythrocytic 1               | 2.2e-16          | -0.4225                |
| O15020     | SPTBN2    | Spectrin beta chain, non-erythrocytic 2               | 5.3e-05          | -0.2257                |
| Q9C0H9     | SRCIN1    | SRC kinase signaling inhibitor 1                      | 2.0e-04          | -0.4440                |
| O43295     | SRGAP3    | SLIT-ROBO Rho GTPase-activating protein 3             | 0.0207           | 0.3612                 |
| P30626     | SRI       | Sorcin                                                | 9.1e-06          | 1.1702                 |
| P37108     | SRP14     | Signal recognition particle 14 kDa protein            | 0.038            | 0.9461                 |
| P61011     | SRP54     | Signal recognition particle 54 kDa protein            | 8.5e-05          | 0.6234                 |
| Q9UHB9     | SRP68     | Signal recognition particle subunit SRP68             | 0.0341           | 0.7819                 |
| O76094     | SRP72     | Signal recognition particle subunit SRP72             | 0.0028           | 0.6622                 |
| P50502     | ST13      | Hsc70-interacting protein                             | 0.001            | 0.6447                 |
| Q92783     | STAM      | Signal transducing adapter molecule 1                 | 0.0096           | 0.4769                 |
| P31948     | STIP1     | Stress-induced-phosphoprotein 1                       | 0.0015           | 0.4117                 |
| P16949     | STMN1     | Stathmin                                              | 9.2e-04          | 1.2763                 |
| E5RGX5     | STMN2     | Stathmin                                              | 1.5e-07          | 1.8456                 |
| Q86Y82     | STX12     | Syntaxin-12                                           | 2.2e-04          | 0.5358                 |
| P61764     | STXBP1    | Syntaxin-binding protein 1                            | 8.1e-16          | 0.6849                 |
| A0A1B0GTP9 | STXBP1    | Syntaxin-binding protein 1                            | 8.1e-16          | 0.6849                 |

Table S1: Significant differentially expressed proteins from children (*continued*)

| UniProtID  | Gene Name | Description                                                    | Adjusted p-value | log2(A/C) |
|------------|-----------|----------------------------------------------------------------|------------------|-----------|
| A0A2R8Y6Y7 | SUCLA2    | Succinate-CoA ligase [ADP-forming] subunit beta, mitochondrial | 0.0015           | 0.8319    |
| Q9Y2Z0     | SUGT1     | Protein SGT1 homolog                                           | 0.0475           | 0.6373    |
| Q9Y5B9     | SUPT16H   | FACT complex subunit SPT16                                     | 0.0094           | 0.9033    |
| P17600     | SYN1      | Synapsin-1                                                     | 0.0028           | -0.3779   |
| Q8NF91     | SYNE1     | Nesprin-1                                                      | 2.5e-04          | -0.3229   |
| C9JFZ1     | SYNJ1     | Synaptojanin-1                                                 | 4.4e-11          | 0.5674    |
| O15061     | SYNM      | Synemin                                                        | 0.0048           | 0.4973    |
| Q8N3V7     | SYNPO     | Synaptopodin                                                   | 2.2e-16          | -1.4218   |
| H0Y9Y3     | SYNPO2    | Synaptopodin-2 (Fragment)                                      | 0.0193           | -0.8938   |
| P21579     | SYT1      | Synaptotagmin-1                                                | 1.8e-10          | -1.0908   |
| O00445     | SYT5      | Synaptotagmin-5                                                | 0.0116           | -0.5687   |
| Q9UI15     | TAGLN3    | Transgelin-3                                                   | 0.0082           | 0.5313    |
| P37837     | TALDO1    | Transaldolase                                                  | 5.4e-10          | 1.4577    |
| J3KTM5     | TANC2     | Protein TANC2 (Fragment)                                       | 0.0219           | -0.4501   |
| Q9HCD6     | TANC2     | Protein TANC2                                                  | 0.0219           | -0.4501   |
| A0A494C0X0 | TBCB      | Tubulin-folding cofactor B                                     | 0.001            | 1.1874    |
| A0A2R8Y5Q8 | TBCE      | Tubulin-specific chaperone E                                   | 0.0021           | 1.4547    |
| Q00059     | TFAM      | Transcription factor A, mitochondrial                          | 2.3e-08          | -1.0428   |
| P29401     | TKT       | Transketolase                                                  | 2.2e-16          | 1.4825    |
| Q9Y490     | TLN1      | Talin-1                                                        | 1.1e-08          | 0.4769    |
| Q9Y4G6     | TLN2      | Talin-2                                                        | 2.2e-16          | 0.5190    |
| P28289     | TMOD1     | Tropomodulin-1                                                 | 5.4e-06          | -0.8035   |
| Q9NZR1     | TMOD2     | Tropomodulin-2                                                 | 3.0e-12          | -0.8838   |
| P62328     | TMSB4X    | Thymosin beta-4                                                | 0.0274           | 1.8072    |
| Q96JJ7     | TMX3      | Protein disulfide-isomerase TMX3                               | 0.0305           | 0.9532    |
| Q92752     | TNR       | Tenascin-R                                                     | 0.0032           | -0.2628   |
| Q9H0E2     | TOLLIP    | Toll-interacting protein                                       | 6.7e-04          | 0.8015    |
| O60784     | TOM1      | Target of Myb protein 1                                        | 0.0189           | 0.9272    |
| Q15785     | TOMM34    | Mitochondrial import receptor subunit TOM34                    | 0.0036           | -0.4776   |
| O94826     | TOMM70    | Mitochondrial import receptor subunit TOM70                    | 0.0046           | 0.4257    |
| Q16890     | TPD52L1   | Tumor protein D53                                              | 0.0233           | -0.5979   |
| P60174     | TPI1      | Triosephosphate isomerase                                      | 2.2e-16          | 1.4523    |
| A0A087WWU8 | TPM3      | Tropomyosin alpha-3 chain                                      | 0.0109           | -0.3881   |
| P06753     | TPM3      | Tropomyosin alpha-3 chain                                      | 0.0109           | -0.3881   |
| A0A494C1B8 | TPP2      | Tripeptidyl-peptidase 2                                        | 0.0124           | 0.4996    |
| Q9BW30     | TPPP3     | Tubulin polymerization-promoting protein family member 3       | 0.0035           | 0.8277    |
| Q5W0H4     | TPT1      | Translationally-controlled tumor protein                       | 8.3e-08          | 1.2758    |
| Q12931     | TRAP1     | Heat shock protein 75 kDa, mitochondrial                       | 0.0162           | 0.7083    |
| H3BP13     | TRAPPC2L  | Trafficking protein particle complex subunit 2-like protein    | 0.0038           | -0.5716   |
| O43617     | TRAPPC3   | Trafficking protein particle complex subunit 3                 | 0.0073           | -0.5065   |
| Q9Y296     | TRAPPC4   | Trafficking protein particle complex subunit 4                 | 0.0109           | -0.5712   |
| Q9C040     | TRIM2     | Tripartite motif-containing protein 2                          | 0.0192           | 0.3257    |
| Q96Q11     | TRNT1     | CCA tRNA nucleotidyltransferase 1, mitochondrial               | 0.0213           | 0.8691    |

Table S1: Significant differentially expressed proteins from children (*continued*)

| UniProtID  | Gene Name | Description                                                | Adjusted p-value | log <sub>2</sub> (A/C) |
|------------|-----------|------------------------------------------------------------|------------------|------------------------|
| P43897     | TSFM      | Elongation factor Ts, mitochondrial                        | 0.0294           | -0.8669                |
| Q7Z4L5     | TTC21B    | Tetratricopeptide repeat protein 21B                       | 0.0269           | -0.7990                |
| Q13509     | TUBB3     | Tubulin beta-3 chain                                       | 5.8e-04          | 0.5857                 |
| P49411     | TUFM      | Elongation factor Tu, mitochondrial                        | 0.0147           | -0.5705                |
| Q6IBS0     | TWF2      | Twinfilin-2                                                | 0.0489           | 0.4215                 |
| P40222     | TXLNA     | Alpha-taxilin                                              | 7.1e-05          | -0.5656                |
| Q9BRA2     | TXNDC17   | Thioredoxin domain-containing protein 17                   | 0.0392           | 1.2653                 |
| Q8NBS9     | TXNDC5    | Thioredoxin domain-containing protein 5                    | 0.0051           | 0.8365                 |
| Q43396     | TXNL1     | Thioredoxin-like protein 1                                 | 0.0135           | 0.5699                 |
| F8W809     | TXNRD1    | Thioredoxin reductase 1, cytoplasmic                       | 6.5e-05          | 1.2041                 |
| P22314     | UBA1      | Ubiquitin-like modifier-activating enzyme 1                | 3.3e-15          | 1.4128                 |
| P68036     | UBE2L3    | Ubiquitin-conjugating enzyme E2 L3                         | 5.0e-04          | 0.7797                 |
| P61081     | UBE2M     | NEDD8-conjugating enzyme Ubc12                             | 8.6e-06          | 0.8960                 |
| P61088     | UBE2N     | Ubiquitin-conjugating enzyme E2 N                          | 6.8e-12          | 1.2739                 |
| Q9C0C9     | UBE2O     | (E3-independent) E2 ubiquitin-conjugating enzyme           | 1.9e-06          | 0.8669                 |
| Q15819     | UBE2V2    | Ubiquitin-conjugating enzyme E2 variant 2                  | 0.0025           | 1.6999                 |
| Q05086     | UBE3A     | Ubiquitin-protein ligase E3A                               | 0.0284           | 0.8519                 |
| O14562     | UBFD1     | Ubiquitin domain-containing protein UBFD1                  | 0.0216           | 0.5898                 |
| P09936     | UCHL1     | Ubiquitin carboxyl-terminal hydrolase isozyme L1           | 9.7e-10          | 1.6288                 |
| O94874     | UFL1      | E3 UFM1-protein ligase 1                                   | 0.0175           | 0.6009                 |
| H0Y614     | UFM1      | Ubiquitin-fold modifier 1 (Fragment)                       | 0.0278           | 0.7961                 |
| Q9NYU2     | UGGT1     | UDP-glucose:glycoprotein glucosyltransferase 1             | 0.0118           | 0.6524                 |
| E7EUC7     | UGP2      | UTP-glucose-1-phosphate uridylyltransferase                | 6.4e-11          | 1.0628                 |
| O60763     | USO1      | General vesicular transport factor p115                    | 1.2e-06          | 0.7034                 |
| P54578     | USP14     | Ubiquitin carboxyl-terminal hydrolase 14                   | 3.5e-05          | 0.7077                 |
| Q8NFA0     | USP32     | Ubiquitin carboxyl-terminal hydrolase 32                   | 0.0213           | 1.1277                 |
| Q93009     | USP7      | Ubiquitin carboxyl-terminal hydrolase 7                    | 0.0051           | 0.5556                 |
| P40818     | USP8      | Ubiquitin carboxyl-terminal hydrolase 8                    | 0.0102           | -0.4310                |
| Q93008     | USP9X     | Probable ubiquitin carboxyl-terminal hydrolase FAF-X       | 0.0239           | 0.4187                 |
| O95292     | VAPB      | Vesicle-associated membrane protein-associated protein B/C | 0.0092           | 0.3971                 |
| Q99536     | VAT1      | Synaptic vesicle membrane protein VAT-1 homolog            | 0.0065           | 0.9272                 |
| Q9HCJ6     | VAT1L     | Synaptic vesicle membrane protein VAT-1 homolog-like       | 0.0489           | 0.7047                 |
| P55072     | VCP       | Transitional endoplasmic reticulum ATPase                  | 1.6e-05          | 0.5037                 |
| F2Z3A6     | VEZT      | Vezatin                                                    | 0.0272           | -0.8457                |
| P08670     | VIM       | Vimentin                                                   | 0.0022           | 0.4879                 |
| Q96RL7     | VPS13A    | Vacuolar protein sorting-associated protein 13A            | 5.6e-07          | 0.7634                 |
| Q9UBQ0     | VPS29     | Vacuolar protein sorting-associated protein 29             | 0.0126           | 0.7748                 |
| Q96QK1     | VPS35     | Vacuolar protein sorting-associated protein 35             | 0.0036           | 0.6484                 |
| Q9NRW7     | VPS45     | Vacuolar protein sorting-associated protein 45             | 0.0058           | 0.4025                 |
| Q9Y2B5     | VPS9D1    | VPS9 domain-containing protein 1                           | 0.0443           | 0.8722                 |
| P62760     | VSNL1     | Visinin-like protein 1                                     | 9.2e-05          | 0.7112                 |
| A0A087WY55 | VTA1      | Chromosome 6 open reading frame 55, isoform CRA_b          | 2.7e-04          | 0.5833                 |

Table S1: Significant differentially expressed proteins from children (*continued*)

| UniProtID | Gene Name | Description                                   | Adjusted p-value | log <sub>2</sub> (A/C) |
|-----------|-----------|-----------------------------------------------|------------------|------------------------|
| O75083    | WDR1      | WD repeat-containing protein 1                | 2.2e-16          | 1.0150                 |
| E7ESC9    | WDR17     | WD repeat-containing protein 17               | 0.0161           | 0.4442                 |
| Q9NQW7    | XPNPEP1   | Xaa-Pro aminopeptidase 1                      | 0.007            | 1.4331                 |
| O14980    | XPO1      | Exportin-1                                    | 0.0489           | 0.7697                 |
| E7ESC6    | XPO7      | Exportin-7                                    | 2.0e-06          | 1.1659                 |
| P13010    | XRCC5     | X-ray repair cross-complementing protein 5    | 4.3e-09          | 0.5722                 |
| P12956    | XRCC6     | X-ray repair cross-complementing protein 6    | 4.3e-08          | 0.5716                 |
| O15498    | YKT6      | Synaptobrevin homolog YKT6                    | 0.0015           | 0.5613                 |
| P31946    | YWHAB     | 14-3-3 protein beta/alpha                     | 0.0015           | 0.5866                 |
| P62258    | YWHAE     | 14-3-3 protein epsilon                        | 3.8e-04          | 0.4311                 |
| P61981    | YWHAG     | 14-3-3 protein gamma                          | 0.0361           | 0.5078                 |
| Q04917    | YWHAH     | 14-3-3 protein eta                            | 2.6e-06          | 0.7080                 |
| P27348    | YWHAQ     | 14-3-3 protein theta                          | 0.0075           | 0.6862                 |
| P63104    | YWHAZ     | 14-3-3 protein zeta/delta                     | 5.6e-09          | 0.6579                 |
| Q96GY0    | ZC2HC1A   | Zinc finger C2HC domain-containing protein 1A | 1.0e-04          | 0.6627                 |
| H3BRB6    | ZNRF1     | E3 ubiquitin-protein ligase ZNRF1             | 0.03             | -1.0801                |

812 proteins, 574 up-regulated, 238 down-regulated



Table S2: Significant differentially expressed proteins from adults

| UniProtID  | Gene Name | Description                                                          | Adjusted p-value | log2(A/C) |
|------------|-----------|----------------------------------------------------------------------|------------------|-----------|
| P01023     | A2M       | Alpha-2-macroglobulin                                                | 9.7e-04          | 0.7428    |
| Q6H8Q1     | ABLIM2    | Actin-binding LIM protein 2                                          | 0.0263           | -0.3344   |
| P53396     | ACLY      | ATP-citrate synthase                                                 | 0.0049           | 0.3086    |
| H9KV75     | ACTN1     | Alpha-actinin-1                                                      | 2.9e-10          | -0.5718   |
| P12814     | ACTN1     | Alpha-actinin-1                                                      | 2.9e-10          | -0.5718   |
| P35609     | ACTN2     | Alpha-actinin-2                                                      | 0.0259           | -0.2705   |
| O43707     | ACTN4     | Alpha-actinin-4                                                      | 1.5e-05          | -0.5032   |
| Q9P0K1     | ADAM22    | Disintegrin and metalloproteinase domain-containing protein 22       | 0.0108           | -0.5594   |
| P35611     | ADD1      | Alpha-adducin                                                        | 0.0322           | -0.2796   |
| P35612     | ADD2      | Beta-adducin                                                         | 7.9e-04          | -0.3572   |
| Q8IVF2     | AHNAK2    | Protein AHNAK2                                                       | 4.7e-08          | -0.6383   |
| Q02952     | AKAP12    | A-kinase anchor protein 12                                           | 7.8e-10          | -0.6510   |
| Q02252     | ALDH6A1   | Methylmalonate-semialdehyde dehydrogenase [acylating], mitochondrial | 2.3e-04          | 0.6756    |
| P49418     | AMPH      | Amphiphysin                                                          | 4.3e-06          | -0.4652   |
| P16157     | ANK1      | Ankyrin-1                                                            | 2.2e-16          | 1.1527    |
| Q01484     | ANK2      | Ankyrin-2                                                            | 2.2e-16          | -0.4209   |
| P08133     | ANXA6     | Annexin A6                                                           | 0.0055           | 0.4388    |
| O95782     | AP2A1     | AP-2 complex subunit alpha-1                                         | 2.1e-07          | -0.3258   |
| A0A087X253 | AP2B1     | AP complex subunit beta                                              | 6.8e-10          | -0.3468   |
| Q17R89     | ARHGAP44  | Rho GTPase-activating protein 44                                     | 0.0356           | -0.5033   |
| V9GYM8     | ARHGEF2   | Rho guanine nucleotide exchange factor 2                             | 0.0477           | -0.3234   |
| Q92747     | ARPC1A    | Actin-related protein 2/3 complex subunit 1A                         | 0.0289           | -0.2216   |
| O15144     | ARPC2     | Actin-related protein 2/3 complex subunit 2                          | 8.5e-05          | -0.4081   |
| P25705     | ATP5F1A   | ATP synthase subunit alpha, mitochondrial                            | 0.0473           | 0.2448    |
| Q93050     | ATP6V0A1  | V-type proton ATPase 116 kDa subunit a isoform 1                     | 0.0022           | -0.4285   |
| F5GYQ1     | ATP6V0D1  | V-type proton ATPase subunit                                         | 0.0227           | -0.5312   |
| P38606     | ATP6V1A   | V-type proton ATPase catalytic subunit A                             | 0.0044           | -0.2852   |
| Q9Y2Q0     | ATP8A1    | Phospholipid-transporting ATPase IA                                  | 0.0012           | 0.4262    |
| Q13825     | AUH       | Methylglutaconyl-CoA hydratase, mitochondrial                        | 0.0391           | -0.3307   |
| P80723     | BASP1     | Brain acid soluble protein 1                                         | 1.6e-08          | -0.7159   |
| O00499     | BIN1      | Myc box-dependent-interacting protein 1                              | 0.0228           | -0.4134   |
| Q9UPA5     | BSN       | Protein bassoon                                                      | 2.0e-14          | -0.5702   |
| A0A1B0GUL6 | BTBD8     | BTB/POZ domain-containing protein 8                                  | 5.4e-04          | -0.9376   |
| P01024     | C3        | Complement C3                                                        | 3.3e-04          | 0.8051    |
| P22748     | CA4       | Carbonic anhydrase 4                                                 | 0.0053           | -0.6880   |
| P54289     | CACNA2D1  | Voltage-dependent calcium channel subunit alpha-2/delta-1            | 2.0e-04          | -0.4247   |
| Q16566     | CAMK4     | Calcium/calmodulin-dependent protein kinase type IV                  | 0.0404           | -0.3555   |
| P52907     | CAPZA1    | F-actin-capping protein subunit alpha-1                              | 0.0199           | -0.6545   |
| P47755     | CAPZA2    | F-actin-capping protein subunit alpha-2                              | 0.034            | -0.6189   |
| B1AK88     | CAPZB     | F-actin-capping protein subunit beta                                 | 0.0139           | -0.3013   |
| P47756     | CAPZB     | F-actin-capping protein subunit beta                                 | 0.0139           | -0.3013   |
| Q8WXD9     | CASKIN1   | Caskin-1                                                             | 4.9e-04          | -0.5270   |

Table S2: Significant differentially expressed proteins from adults (*continued*)

| UniProtID  | Gene Name | Description                                                                        | Adjusted p-value | log2(A/C) |
|------------|-----------|------------------------------------------------------------------------------------|------------------|-----------|
| Q5SW79     | CEP170    | Centrosomal protein of 170 kDa                                                     | 0.0036           | -0.3472   |
| Q9Y4F5     | CEP170B   | Centrosomal protein of 170 kDa protein B                                           | 0.0332           | -0.3300   |
| Q14008     | CKAP5     | Cytoskeleton-associated protein 5                                                  | 7.8e-04          | -0.2398   |
| P12277     | CKB       | Creatine kinase B-type                                                             | 0.0261           | 0.5775    |
| P30622     | CLIP1     | CAP-Gly domain-containing linker protein 1                                         | 0.0204           | -0.3180   |
| Q9UDT6     | CLIP2     | CAP-Gly domain-containing linker protein 2                                         | 2.6e-04          | -0.3796   |
| P09543     | CNP       | 2',3'-cyclic-nucleotide 3'-phosphodiesterase                                       | 7.5e-04          | 0.3815    |
| Q12860     | CNTN1     | Contactin-1                                                                        | 1.9e-06          | -0.4092   |
| Q05707     | COL14A1   | Collagen alpha-1(XIV) chain                                                        | 1.8e-05          | 0.7599    |
| P02452     | COL1A1    | Collagen alpha-1(I) chain                                                          | 0.0108           | 1.1134    |
| Q9ULV4     | CORO1C    | Coronin-1C                                                                         | 0.0058           | -0.3321   |
| P29762     | CRABP1    | Cellular retinoic acid-binding protein 1                                           | 0.0088           | 1.6025    |
| P02511     | CRYAB     | Alpha-crystallin B chain                                                           | 0.001            | 0.6200    |
| Q14247     | CTTN      | Src substrate cortactin                                                            | 1.1e-06          | -0.7194   |
| Q96F07     | CYFIP2    | Cytoplasmic FMR1-interacting protein 2                                             | 0.0228           | -0.1842   |
| Q16643     | DBN1      | Drebrin                                                                            | 1.9e-04          | -0.5681   |
| P81605     | DCD       | Dermcidin                                                                          | 0.0015           | -0.7000   |
| Q13561     | DCTN2     | Dynactin subunit 2                                                                 | 0.0304           | -0.3251   |
| O00571     | DDX3X     | ATP-dependent RNA helicase DDX3X                                                   | 0.0475           | -0.3185   |
| Q8TDJ6     | DMXL2     | DmX-like protein 2                                                                 | 1.4e-07          | -0.3172   |
| O14576     | DYNC1H1   | Cytoplasmic dynein 1 intermediate chain 1                                          | 0.001            | -0.7617   |
| Q9Y6G9     | DYNC1LI1  | Cytoplasmic dynein 1 light intermediate chain 1                                    | 1.5e-05          | -0.4682   |
| O43237     | DYNC1LI2  | Cytoplasmic dynein 1 light intermediate chain 2                                    | 1.8e-04          | -0.4315   |
| O60869     | EDF1      | Endothelial differentiation-related factor 1                                       | 0.0092           | -0.8558   |
| Q96C19     | EFHD2     | EF-hand domain-containing protein D2                                               | 0.0119           | -0.8062   |
| Q9H4M9     | EHD1      | EH domain-containing protein 1                                                     | 7.8e-04          | 0.6610    |
| Q9NZN4     | EHD2      | EH domain-containing protein 2                                                     | 0.0139           | 0.4941    |
| A8MUM1     | EIPR1     | EARP and GARP complex-interacting protein 1                                        | 0.0325           | -0.5040   |
| A0A2R8YD30 | EPB41     | Erythrocyte membrane protein band 4.1 (Elliptocytosis 1, RH-linked), isoform CRA_e | 6.3e-12          | 1.1333    |
| A8K968     | EPB41L3   | Band 4.1-like protein 3                                                            | 0.0445           | -0.2408   |
| Q9Y2J2     | EPB41L3   | Band 4.1-like protein 3                                                            | 0.0445           | -0.2408   |
| P16452     | EPB42     | Erythrocyte membrane protein band 4.2                                              | 0.0013           | 1.2109    |
| Q9UBC2     | EPS15L1   | Epidermal growth factor receptor substrate 15-like 1                               | 3.8e-04          | -0.5144   |
| Q9BSJ8     | ESYT1     | Extended synaptotagmin-1                                                           | 0.0139           | 0.3806    |
| A0A499FIX8 | ESYT2     | Extended synaptotagmin-2                                                           | 0.0287           | 0.3802    |
| Q9UI08     | EVL       | Ena/VASP-like protein                                                              | 0.0027           | -0.5963   |
| P00488     | F13A1     | Coagulation factor XIII A chain                                                    | 0.0323           | 1.3253    |
| Q9NSD9     | FARSB     | Phenylalanine-tRNA ligase beta subunit                                             | 0.0344           | -0.2818   |
| P49327     | FASN      | Fatty acid synthase                                                                | 0.0335           | 0.3050    |
| Q8TF61     | FBXO41    | F-box only protein 41                                                              | 0.0119           | -0.4374   |
| P02671     | FGA       | Fibrinogen alpha chain                                                             | 2.8e-05          | 1.2400    |
| P02675     | FGB       | Fibrinogen beta chain                                                              | 0.0097           | 1.0210    |
| C9JEU5     | FGG       | Fibrinogen gamma chain                                                             | 6.0e-05          | 1.2511    |
| Q00688     | FKBP3     | Peptidyl-prolyl cis-trans isomerase FKBP3                                          | 9.7e-04          | -0.7519   |
| Q9NZ56     | FMN2      | Formin-2                                                                           | 0.0333           | -0.4679   |

Table S2: Significant differentially expressed proteins from adults (*continued*)

| UniProtID  | Gene Name | Description                                                       | Adjusted p-value | log2(A/C) |
|------------|-----------|-------------------------------------------------------------------|------------------|-----------|
| P11413     | G6PD      | Glucose-6-phosphate 1-dehydrogenase                               | 0.0449           | 0.4339    |
| P17677     | GAP43     | Neuromodulin                                                      | 2.5e-04          | -1.1782   |
| Q8TB36     | GDAP1     | Ganglioside-induced differentiation-associated protein 1          | 0.0046           | 0.5644    |
| K7EMP8     | GFAP      | Glial fibrillary acidic protein                                   | 8.3e-05          | 0.4318    |
| A0A2R8YDT1 | GLUL      | Glutamine synthetase                                              | 5.5e-04          | -0.6963   |
| Q7Z2K8     | GPRIN1    | G protein-regulated inducer of neurite outgrowth 1                | 2.9e-05          | -0.4745   |
| H0Y972     | GRIA2     | Glutamate receptor 2 (Fragment)                                   | 1.1e-04          | -0.3377   |
| P42262     | GRIA2     | Glutamate receptor 2                                              | 1.1e-04          | -0.3377   |
| P42263     | GRIA3     | Glutamate receptor 3                                              | 0.0183           | -0.3875   |
| P48058     | GRIA4     | Glutamate receptor 4                                              | 0.0203           | -0.3301   |
| Q14832     | GRM3      | Metabotropic glutamate receptor 3                                 | 0.0244           | -0.3372   |
| A0A3B3ITW1 | GSK3B     | Glycogen synthase kinase-3 beta                                   | 0.0316           | -0.8194   |
| P15170     | GSPT1     | Eukaryotic peptide chain release factor GTP-binding subunit ERF3A | 0.0364           | 0.3503    |
| E9PHN7     | GSTM2     | Glutathione S-transferase Mu 2                                    | 0.0341           | 0.8401    |
| H0YFD6     | HADHA     | Trifunctional enzyme subunit alpha, mitochondrial                 | 1.2e-06          | 0.3657    |
| P02042     | HBD       | Hemoglobin subunit delta                                          | 2.9e-10          | 1.6059    |
| P19367     | HK1       | Hexokinase-1                                                      | 4.9e-05          | 0.3367    |
| F8W6I7     | HNRNPA1   | Heterogeneous nuclear ribonucleoprotein A1                        | 0.0123           | -0.4814   |
| B4DY08     | HNRNPC    | Heterogeneous nuclear ribonucleoproteins C1/C2                    | 0.0021           | -0.6128   |
| H0Y8G5     | HNRNPD    | Heterogeneous nuclear ribonucleoprotein D0 (Fragment)             | 0.0057           | -0.4471   |
| P61978     | HNRNPK    | Heterogeneous nuclear ribonucleoprotein K                         | 3.2e-04          | -0.4930   |
| O43390     | HNRNPR    | Heterogeneous nuclear ribonucleoprotein R                         | 0.0382           | -0.4611   |
| P00738     | HP        | Haptoglobin                                                       | 0.0228           | 1.1207    |
| P51659     | HSD17B4   | Peroxisomal multifunctional enzyme type 2                         | 0.0108           | -0.2603   |
| Q3SXM5     | HSDL1     | Inactive hydroxysteroid dehydrogenase-like protein 1              | 0.0203           | 0.7759    |
| P11142     | HSPA8     | Heat shock cognate 71 kDa protein                                 | 0.0263           | -0.2189   |
| P10809     | HSPD1     | 60 kDa heat shock protein, mitochondrial                          | 0.0053           | 0.2885    |
| P42858     | HTT       | Huntingtin                                                        | 0.0215           | 0.2960    |
| P48735     | IDH2      | Isocitrate dehydrogenase [NADP], mitochondrial                    | 0.0014           | 0.5057    |
| Q96ID5     | IGSF21    | Immunoglobulin superfamily member 21                              | 0.0274           | -0.5569   |
| A0A0A0MTH3 | ILK       | Integrin-linked protein kinase                                    | 0.0108           | 0.4199    |
| B9A067     | IMMT      | MICOS complex subunit MIC60                                       | 0.02             | 0.2241    |
| A0A3F2YNW8 | ITPR1     | Inositol 1,4,5-trisphosphate receptor type 1                      | 0.0236           | 0.3216    |
| Q15811     | ITSN1     | Intersectin-1                                                     | 0.01             | -0.2580   |
| Q6ZVL6     | KIAA1549L | UPF0606 protein KIAA1549L                                         | 3.9e-04          | -0.5817   |
| P13646     | KRT13     | Keratin, type I cytoskeletal 13                                   | 0.0059           | -1.4276   |
| P02533     | KRT14     | Keratin, type I cytoskeletal 14                                   | 4.9e-05          | -0.9068   |
| Q04695     | KRT17     | Keratin, type I cytoskeletal 17                                   | 0.0228           | -1.2949   |
| P13647     | KRT5      | Keratin, type II cytoskeletal 5                                   | 5.4e-04          | -0.8061   |
| P04259     | KRT6B     | Keratin, type II cytoskeletal 6B                                  | 1.6e-04          | -0.9768   |
| Q14847     | LASP1     | LIM and SH3 domain protein 1                                      | 0.0023           | -0.5872   |
| O95970     | LGI1      | Leucine-rich glioma-inactivated protein 1                         | 6.6e-04          | -0.4280   |
| P02545     | LMNA      | Prelamin-A/C                                                      | 2.8e-05          | -0.6551   |

Table S2: Significant differentially expressed proteins from adults (*continued*)

| UniProtID  | Gene Name | Description                                                                 | Adjusted p-value | log <sub>2</sub> (A/C) |
|------------|-----------|-----------------------------------------------------------------------------|------------------|------------------------|
| P20700     | LMNB1     | Lamin-B1                                                                    | 0.01             | -0.4531                |
| Q13449     | LSAMP     | Limbic system-associated membrane protein                                   | 0.0479           | -0.4633                |
| E7EQB2     | LTF       | Lactotransferrin (Fragment)                                                 | 8.9e-06          | 1.1882                 |
| E9PGC8     | MAP1A     | Microtubule-associated protein 1A                                           | 2.2e-16          | -0.6578                |
| P46821     | MAP1B     | Microtubule-associated protein 1B                                           | 2.2e-16          | -0.6519                |
| P11137     | MAP2      | Microtubule-associated protein 2                                            | 2.2e-16          | -0.7282                |
| F8W9U4     | MAP4      | Microtubule-associated protein                                              | 1.6e-08          | -0.5757                |
| P27816     | MAP4      | Microtubule-associated protein 4                                            | 1.6e-08          | -0.5757                |
| Q96JE9     | MAP6      | Microtubule-associated protein 6                                            | 2.2e-16          | -0.9282                |
| A0A0G2JQJ7 | MAPT      | Microtubule-associated protein                                              | 1.5e-08          | -0.5721                |
| Q9P0L2     | MARK1     | Serine/threonine-protein kinase MARK1                                       | 0.0301           | -0.3550                |
| Q86UE4     | MTDH      | Protein LYRIC                                                               | 0.0297           | -0.9413                |
| P43490     | NAMPT     | Nicotinamide phosphoribosyltransferase                                      | 1.7e-04          | 0.5761                 |
| A0A0D9SF30 | NCAM1     | Neural cell adhesion molecule 1 (Fragment)                                  | 0.0073           | -0.3008                |
| P13591     | NCAM1     | Neural cell adhesion molecule 1                                             | 0.0073           | -0.3008                |
| Q9Y2A7     | NCKAP1    | Nck-associated protein 1                                                    | 1.0e-05          | -0.2638                |
| P19338     | NCL       | Nucleolin                                                                   | 0.0092           | -0.4099                |
| Q16795     | NDUFA9    | NADH dehydrogenase [ubiquinone] 1 alpha subcomplex subunit 9, mitochondrial | 0.0445           | 0.5646                 |
| P12036     | NEFH      | Neurofilament heavy polypeptide                                             | 0.0087           | -0.7125                |
| P07196     | NEFL      | Neurofilament light polypeptide                                             | 0.0014           | -0.6389                |
| P07197     | NEFM      | Neurofilament medium polypeptide                                            | 1.2e-06          | -0.6722                |
| O94856     | NFASC     | Neurofascin                                                                 | 5.5e-04          | -0.5325                |
| P06748     | NPM1      | Nucleophosmin                                                               | 0.0378           | -0.5093                |
| O95897     | OLFM2     | Noelin-2                                                                    | 2.9e-04          | -0.6660                |
| O60313     | OPA1      | Dynamin-like 120 kDa protein, mitochondrial                                 | 0.0015           | 0.2875                 |
| Q14982     | OPCML     | Opioid-binding protein/cell adhesion molecule                               | 0.0074           | -0.5459                |
| P55809     | OXCT1     | Succinyl-CoA:3-ketoacid coenzyme A transferase 1, mitochondrial             | 6.3e-04          | 0.7805                 |
| Q9UQ80     | PA2G4     | Proliferation-associated protein 2G4                                        | 0.0028           | -0.5457                |
| A0A087WTT1 | PABPC1    | Polyadenylate-binding protein                                               | 0.0015           | -0.4240                |
| Q13310     | PABPC4    | Polyadenylate-binding protein 4                                             | 0.0264           | -0.3896                |
| Q9BY11     | PACSIN1   | Protein kinase C and casein kinase substrate in neurons protein 1           | 6.5e-07          | -0.6005                |
| Q9Y2J8     | PADI2     | Protein-arginine deiminase type-2                                           | 9.8e-04          | 0.8023                 |
| O75781     | PALM      | Paralemmin-1                                                                | 8.9e-06          | -0.6310                |
| Q96AQ6     | PBXIP1    | Pre-B-cell leukemia transcription factor-interacting protein 1              | 0.0063           | 0.5467                 |
| P11498     | PC        | Pyruvate carboxylase, mitochondrial                                         | 4.5e-05          | 0.4919                 |
| Q9Y6V0     | PCLO      | Protein piccolo                                                             | 2.2e-16          | -0.5516                |
| P17858     | PFKL      | ATP-dependent 6-phosphofructokinase, liver type                             | 0.0061           | 0.3717                 |
| Q6PCE3     | PGM2L1    | Glucose 1,6-bisphosphate synthase                                           | 0.0101           | 0.6420                 |
| Q9NQ66     | PLCB1     | 1-phosphatidylinositol 4,5-bisphosphate phosphodiesterase beta-1            | 6.0e-05          | -0.4088                |
| O14974     | PPP1R12A  | Protein phosphatase 1 regulatory subunit 12A                                | 1.5e-04          | -0.4708                |
| Q9ULJ8     | PPP1R9A   | Neurabin-1                                                                  | 6.6e-04          | -0.6727                |

Table S2: Significant differentially expressed proteins from adults (*continued*)

| UniProtID  | Gene Name | Description                                                 | Adjusted p-value | log2(A/C) |
|------------|-----------|-------------------------------------------------------------|------------------|-----------|
| Q96SB3     | PPP1R9B   | Neurabin-2                                                  | 0.0178           | -0.4797   |
| P32119     | PRDX2     | Peroxiredoxin-2                                             | 0.0132           | 0.3970    |
| O14744     | PRMT5     | Protein arginine N-methyltransferase 5                      | 6.5e-06          | 0.6228    |
| Q9Y617     | PSAT1     | Phosphoserine aminotransferase                              | 0.0099           | 0.7084    |
| E5RJ29     | PSD3      | PH and SEC7 domain-containing protein 3                     | 0.0203           | -0.2275   |
| B4DKF8     | PSD3      | PH and SEC7 domain-containing protein 3                     | 0.0203           | -0.2275   |
| Q8WXF1     | PSPC1     | Paraspeckle component 1                                     | 0.0013           | -0.6474   |
| A0A494C0U4 | PTPRZ1    | Receptor-type tyrosine-protein phosphatase zeta             | 1.6e-04          | -0.4718   |
| P11216     | PYGB      | Glycogen phosphorylase, brain form                          | 3.6e-08          | 0.4505    |
| Q96TC7     | RMDN3     | Regulator of microtubule dynamics protein 3                 | 0.016            | 0.5359    |
| Q9Y2J0     | RPH3A     | Rabphilin-3A                                                | 3.8e-04          | -0.5045   |
| P26373     | RPL13     | 60S ribosomal protein L13                                   | 0.0113           | -0.7806   |
| O95248     | SBF1      | Myotubularin-related protein 5                              | 0.0247           | 0.3128    |
| Q8NBX0     | SCCPDH    | Saccharopine dehydrogenase-like oxidoreductase              | 0.0297           | 0.4766    |
| D6RER5     | SEPTIN11  | Septin 11                                                   | 0.0149           | -0.5042   |
| A0A2R8Y4H2 | SEPTIN3   | Septin 3                                                    | 7.7e-07          | -0.5529   |
| G3XAH0     | SEPTIN5   | HCG2002594, isoform CRA_c                                   | 2.8e-07          | -0.5091   |
| Q99719     | SEPTIN5   | Septin-5                                                    | 2.8e-07          | -0.5091   |
| Q14141     | SEPTIN6   | Septin-6                                                    | 6.5e-07          | -0.6028   |
| Q16181     | SEPTIN7   | Septin-7                                                    | 3.0e-10          | -0.5180   |
| Q92599     | SEPTIN8   | Septin-8                                                    | 9.7e-04          | -0.3968   |
| Q9UHD8     | SEPTIN9   | Septin-9                                                    | 5.1e-11          | -0.6365   |
| A0A024R6I7 | SERPINA1  | Alpha-1-antitrypsin                                         | 0.0049           | 1.0232    |
| P23246     | SFPQ      | Splicing factor, proline- and glutamine-rich                | 0.0074           | -0.5707   |
| Q9BQI5     | SGIP1     | SH3-containing GRB2-like protein 3-interacting protein 1    | 3.7e-08          | -0.7409   |
| Q96B97     | SH3KBP1   | SH3 domain-containing kinase-binding protein 1              | 0.0379           | -0.3615   |
| Q9H2X9     | SLC12A5   | Solute carrier family 12 member 5                           | 0.0068           | -0.3207   |
| Q00325     | SLC25A3   | Phosphate carrier protein, mitochondrial                    | 0.0137           | 0.4015    |
| P02730     | SLC4A1    | Band 3 anion transport protein                              | 1.2e-05          | 1.2039    |
| Q9BX66     | SORBS1    | Sorbin and SH3 domain-containing protein 1                  | 0.0044           | -0.4296   |
| P02549     | SPTA1     | Spectrin alpha chain, erythrocytic 1                        | 2.2e-16          | 1.3582    |
| A0A0D9SGF6 | SPTAN1    | Spectrin alpha chain, non-erythrocytic 1                    | 2.2e-16          | -0.3053   |
| P11277     | SPTB      | Spectrin beta chain, erythrocytic                           | 2.2e-16          | 1.2303    |
| Q01082     | SPTBN1    | Spectrin beta chain, non-erythrocytic 1                     | 1.9e-12          | -0.2467   |
| O15020     | SPTBN2    | Spectrin beta chain, non-erythrocytic 2                     | 0.0287           | -0.1381   |
| P27105     | STOM      | Erythrocyte band 7 integral membrane protein                | 0.0122           | 1.0906    |
| P61764     | STXBP1    | Syntaxin-binding protein 1                                  | 5.4e-04          | 0.4252    |
| A0A1B0GTP9 | STXBP1    | Syntaxin-binding protein 1                                  | 5.4e-04          | 0.4252    |
| P53999     | SUB1      | Activated RNA polymerase II transcriptional coactivator p15 | 0.0098           | -0.6136   |
| P17600     | SYN1      | Synapsin-1                                                  | 2.8e-11          | -0.5887   |
| C9JFZ1     | SYNJ1     | Synaptojanin-1                                              | 3.8e-04          | -0.3585   |
| Q8N3V7     | SYNPO     | Synaptopodin                                                | 1.4e-08          | -0.7932   |
| P21579     | SYT1      | Synaptotagmin-1                                             | 1.6e-04          | -0.4968   |
| Q9UI15     | TAGLN3    | Transgelin-3                                                | 3.5e-04          | -0.8186   |

Table S2: Significant differentially expressed proteins from adults (*continued*)

| UniProtID | Gene Name | Description                                      | Adjusted p-value | log <sub>2</sub> (A/C) |
|-----------|-----------|--------------------------------------------------|------------------|------------------------|
| P21980    | TGM2      | Protein-glutamine gamma-glutamyltransferase 2    | 0.0128           | 1.0116                 |
| J3QRJ3    | THY1      | Thy-1 membrane glycoprotein                      | 0.0418           | -0.6389                |
| Q9UDY2    | TJP2      | Tight junction protein ZO-2                      | 0.0297           | 0.3998                 |
| P29401    | TKT       | Transketolase                                    | 8.1e-05          | 0.5434                 |
| Q9NZR1    | TMOD2     | Tropomodulin-2                                   | 1.9e-06          | -0.7184                |
| P67936    | TPM4      | Tropomyosin alpha-4 chain                        | 0.0023           | -0.7267                |
| Q13885    | TUBB2A    | Tubulin beta-2A chain                            | 8.3e-05          | 0.4569                 |
| Q13509    | TUBB3     | Tubulin beta-3 chain                             | 0.0481           | 0.4298                 |
| P22314    | UBA1      | Ubiquitin-like modifier-activating enzyme 1      | 4.9e-05          | 0.8526                 |
| Q14157    | UBAP2L    | Ubiquitin-associated protein 2-like              | 0.0215           | -0.5814                |
| P09936    | UCHL1     | Ubiquitin carboxyl-terminal hydrolase isozyme L1 | 0.0203           | 0.9351                 |

226 proteins, 73 up-regulated, 153 down-regulated

Table S3: Significantly enriched Reactome pathways for proteins ranked by log2(fold-change) in children

| Pathway                                                                              | Adjusted p-value | Norm. Enrich. Score | # genes | Genes                                                                                                                                                                                                                                                                                                                                                                |
|--------------------------------------------------------------------------------------|------------------|---------------------|---------|----------------------------------------------------------------------------------------------------------------------------------------------------------------------------------------------------------------------------------------------------------------------------------------------------------------------------------------------------------------------|
| Unblocking of NMDA receptors, glutamate binding and activation                       | 0.0000           | 2.3105              | 14      | ACTN2, CAMK2A, CAMK2B, DLG1, DLG3, GRIA1, GRIA2, GRIA3, GRIA4, GRIN1, GRIN2A, GRIN2B, LRRC7, NEFL                                                                                                                                                                                                                                                                    |
| Negative regulation of NMDA receptor-mediated neuronal transmission                  | 0.0006           | 2.1498              | 14      | ACTN2, CAMK1, CAMK2A, CAMK2B, CAMK4, DLG1, DLG3, GRIN1, GRIN2A, GRIN2B, LRRC7, NEFL, PPM1E, PPM1F                                                                                                                                                                                                                                                                    |
| Long-term potentiation                                                               | 0.0011           | 2.1379              | 14      | ACTN2, CAMK2A, CAMK2B, DLG1, DLG3, GRIA1, GRIA2, GRIN1, GRIN2A, GRIN2B, LRRC7, NEFL, NRGN, SRC                                                                                                                                                                                                                                                                       |
| Activation of AMPA receptors                                                         | 0.0035           | 1.9252              | 4       | GRIA1, GRIA2, GRIA3, GRIA4                                                                                                                                                                                                                                                                                                                                           |
| Ras activation upon Ca <sup>2+</sup> influx through NMDA receptor                    | 0.0499           | 1.8620              | 11      | ACTN2, CAMK2A, CAMK2B, DLG1, DLG3, GRIN1, GRIN2B, LRRC7, NEFL, RASGRF1, RASGRF2                                                                                                                                                                                                                                                                                      |
| Vpr-mediated induction of apoptosis by mitochondrial outer membrane permeabilization | 0.0007           | 1.7803              | 3       | SLC25A4, SLC25A5, SLC25A6                                                                                                                                                                                                                                                                                                                                            |
| Viral mRNA Translation                                                               | 0.0030           | 1.7624              | 50      | DNAJC3, RPL10A, RPL12, RPL13, RPL13A, RPL14, RPL19, RPL21, RPL23, RPL23A, RPL24, RPL27, RPL28, RPL3, RPL30, RPL34, RPL35, RPL35A, RPL36, RPL36AL, RPL37A, RPL38, RPL4, RPL6, RPL7, RPL7A, RPL8, RPL9, RPLP0, RPLP2, RPS10, RPS11, RPS12, RPS13, RPS16, RPS18, RPS19, RPS2, RPS20, RPS21, RPS23, RPS25, RPS28, RPS3, RPS3A, RPS4X, RPS6, RPS7, RPS8, RPSA             |
| Eukaryotic Translation Termination                                                   | 0.0030           | 1.7263              | 52      | APEH, GSPT1, GSPT2, RPL10A, RPL12, RPL13, RPL13A, RPL14, RPL19, RPL21, RPL23, RPL23A, RPL24, RPL27, RPL28, RPL3, RPL30, RPL34, RPL35, RPL35A, RPL36, RPL36AL, RPL37A, RPL38, RPL4, RPL6, RPL7, RPL7A, RPL8, RPL9, RPLP0, RPLP2, RPS10, RPS11, RPS12, RPS13, RPS16, RPS18, RPS19, RPS2, RPS20, RPS21, RPS23, RPS25, RPS28, RPS3, RPS3A, RPS4X, RPS6, RPS7, RPS8, RPSA |
| Selenocysteine synthesis                                                             | 0.0041           | 1.7164              | 51      | EEFSEC, RPL10A, RPL12, RPL13, RPL13A, RPL14, RPL19, RPL21, RPL23, RPL23A, RPL24, RPL27, RPL28, RPL3, RPL30, RPL34, RPL35, RPL35A, RPL36, RPL36AL, RPL37A, RPL38, RPL4, RPL6, RPL7, RPL7A, RPL8, RPL9, RPLP0, RPLP2, RPS10, RPS11, RPS12, RPS13, RPS16, RPS18, RPS19, RPS2, RPS20, RPS21, RPS23, RPS25, RPS28, RPS3, RPS3A, RPS4X, RPS6, RPS7, RPS8, RPSA, SEPHS2     |

Table S3: Significantly enriched Reactome pathways for proteins ranked by log2(fold-change) in children (*continued*)

| Pathway                                                                      | Adjusted p-value | Norm. Enrich. Score | # genes | Genes                                                                                                                                                                                                                                                                                                                                                                                                     |
|------------------------------------------------------------------------------|------------------|---------------------|---------|-----------------------------------------------------------------------------------------------------------------------------------------------------------------------------------------------------------------------------------------------------------------------------------------------------------------------------------------------------------------------------------------------------------|
| Response of EIF2AK4 (GCN2) to amino acid deficiency                          | 0.0030           | 1.7114              | 54      | ASNS, EIF2S1, EIF2S2, EIF2S3, GCN1, RPL10A, RPL12, RPL13, RPL13A, RPL14, RPL19, RPL21, RPL23, RPL23A, RPL24, RPL27, RPL28, RPL3, RPL30, RPL34, RPL35, RPL35A, RPL36, RPL36AL, RPL37A, RPL38, RPL4, RPL6, RPL7, RPL7A, RPL8, RPL9, RPLP0, RPLP2, RPS10, RPS11, RPS12, RPS13, RPS16, RPS18, RPS19, RPS2, RPS20, RPS21, RPS23, RPS25, RPS28, RPS3, RPS3A, RPS4X, RPS6, RPS7, RPS8, RPSA                      |
| Peptide chain elongation                                                     | 0.0037           | 1.7067              | 51      | EEF1A1, EEF2, RPL10A, RPL12, RPL13, RPL13A, RPL14, RPL19, RPL21, RPL23, RPL23A, RPL24, RPL27, RPL28, RPL3, RPL30, RPL34, RPL35, RPL35A, RPL36, RPL36AL, RPL37A, RPL38, RPL4, RPL6, RPL7, RPL7A, RPL8, RPL9, RPLP0, RPLP2, RPS10, RPS11, RPS12, RPS13, RPS16, RPS18, RPS19, RPS2, RPS20, RPS21, RPS23, RPS25, RPS28, RPS3, RPS3A, RPS4X, RPS6, RPS7, RPS8, RPSA                                            |
| Neurexins and neuroligins                                                    | 0.0170           | 1.7048              | 37      | APBA1, APBA2, DBNL, DLG3, DLGAP1, DLGAP3, DLGAP4, EPB41L1, EPB41L5, GRIN1, GRIN2A, GRIN2B, GRM1, GRM5, HOMER1, HOMER2, LIN7A, LIN7B, LIN7C, LRRTM1, LRRTM2, LRRTM3, NLGN2, NLGN3, NLGN4X, NRXN2, NRXN3, PDLIM5, SHANK1, SHANK2, SHANK3, SIPA1L1, STX1A, STXBP1, SYT1, SYT12, SYT7                                                                                                                         |
| Nonsense Mediated Decay (NMD) independent of the Exon Junction Complex (EJC) | 0.0066           | 1.6770              | 54      | GSPT1, GSPT2, NCBP1, NCBP2, RPL10A, RPL12, RPL13, RPL13A, RPL14, RPL19, RPL21, RPL23, RPL23A, RPL24, RPL27, RPL28, RPL3, RPL30, RPL34, RPL35, RPL35A, RPL36, RPL36AL, RPL37A, RPL38, RPL4, RPL6, RPL7, RPL7A, RPL8, RPL9, RPLP0, RPLP2, RPS10, RPS11, RPS12, RPS13, RPS16, RPS18, RPS19, RPS2, RPS20, RPS21, RPS23, RPS25, RPS28, RPS3, RPS3A, RPS4X, RPS6, RPS7, RPS8, RPSA, UPF1                        |
| Major pathway of rRNA processing in the nucleolus and cytosol                | 0.0170           | 1.6524              | 57      | CSNK1E, DDX21, DIS3, EXOSC10, EXOSC2, NCL, NOP58, RPL10A, RPL12, RPL13, RPL13A, RPL14, RPL19, RPL21, RPL23, RPL23A, RPL24, RPL27, RPL28, RPL3, RPL30, RPL34, RPL35, RPL35A, RPL36, RPL36AL, RPL37A, RPL38, RPL4, RPL6, RPL7, RPL7A, RPL8, RPL9, RPLP0, RPLP2, RPS10, RPS11, RPS12, RPS13, RPS16, RPS18, RPS19, RPS2, RPS20, RPS21, RPS23, RPS25, RPS28, RPS3, RPS3A, RPS4X, RPS6, RPS7, RPS8, RPSA, UTP20 |



Table S3: Significantly enriched Reactome pathways for proteins ranked by log<sub>2</sub>(fold-change) in children (*continued*)

| Pathway                                                                   | Adjusted p-value | Norm. Enrich. Score | # genes | Genes                                                                                                                                                                                                                                                                                                                                                                                                                                                    |
|---------------------------------------------------------------------------|------------------|---------------------|---------|----------------------------------------------------------------------------------------------------------------------------------------------------------------------------------------------------------------------------------------------------------------------------------------------------------------------------------------------------------------------------------------------------------------------------------------------------------|
| SRP-dependent cotranslational protein targeting to membrane               | 0.0066           | 1.6277              | 59      | DDOST, RPL10A, RPL12, RPL13, RPL13A, RPL14, RPL19, RPL21, RPL23, RPL23A, RPL24, RPL27, RPL28, RPL3, RPL30, RPL34, RPL35, RPL35A, RPL36, RPL36AL, RPL37A, RPL38, RPL4, RPL6, RPL7, RPL7A, RPL8, RPL9, RPLP0, RPLP2, RPN1, RPN2, RPS10, RPS11, RPS12, RPS13, RPS16, RPS18, RPS19, RPS2, RPS20, RPS21, RPS23, RPS25, RPS28, RPS3, RPS3A, RPS4X, RPS6, RPS7, RPS8, RPSA, SRP14, SRP54, SRP68, SRP72, SRP9, SRPRA, SRPRB                                      |
| Formation of a pool of free 40S subunits                                  | 0.0135           | 1.6177              | 59      | EIF1AX, EIF3A, EIF3B, EIF3D, EIF3E, EIF3F, EIF3I, EIF3J, EIF3K, EIF3L, RPL10A, RPL12, RPL13, RPL13A, RPL14, RPL19, RPL21, RPL23, RPL23A, RPL24, RPL27, RPL28, RPL3, RPL30, RPL34, RPL35, RPL35A, RPL36, RPL36AL, RPL37A, RPL38, RPL4, RPL6, RPL7, RPL7A, RPL8, RPL9, RPLP0, RPLP2, RPS10, RPS11, RPS12, RPS13, RPS16, RPS18, RPS19, RPS2, RPS20, RPS21, RPS23, RPS25, RPS28, RPS3, RPS3A, RPS4X, RPS6, RPS7, RPS8, RPSA                                  |
| Nonsense Mediated Decay (NMD) enhanced by the Exon Junction Complex (EJC) | 0.0101           | 1.6121              | 64      | DCP1A, EIF4A3, GSPT1, GSPT2, MAGOH, NCBP1, NCBP2, PPP2R1A, PPP2R2A, RPL10A, RPL12, RPL13, RPL13A, RPL14, RPL19, RPL21, RPL23, RPL23A, RPL24, RPL27, RPL28, RPL3, RPL30, RPL34, RPL35, RPL35A, RPL36, RPL36AL, RPL37A, RPL38, RPL4, RPL6, RPL7, RPL7A, RPL8, RPL9, RPLP0, RPLP2, RPS10, RPS11, RPS12, RPS13, RPS16, RPS18, RPS19, RPS2, RPS20, RPS21, RPS23, RPS25, RPS28, RPS3, RPS3A, RPS4X, RPS6, RPS7, RPS8, RPSA, SMG1, SMG5, SMG6, SMG8, UPF1, UPF2 |
| Cytosolic tRNA aminoacylation                                             | 0.0406           | -1.9795             | 18      | AARS1, AIMP1, AIMP2, DARS1, EEF1E1, EPRS1, FARSB, GARS1, KARS1, LARS1, MARS1, NARS1, QARS1, RARS1, TARS1, VARS1, WARS1, YARS1                                                                                                                                                                                                                                                                                                                            |
| Chk1/Chk2(Cds1) mediated inactivation of Cyclin B:Cdk1 complex            | 0.0374           | -2.0533             | 6       | YWHAB, YWHAE, YWHAG, YWHAH, YWHAQ, YWHAZ                                                                                                                                                                                                                                                                                                                                                                                                                 |
| Glycolysis                                                                | 0.0406           | -2.0706             | 16      | ALDOA, ALDOC, BPGM, ENO1, ENO2, GAPDH, GNPDA1, GNPDA2, HK1, PFKL, PFKM, PFKP, PGAM1, PGK1, PGM2L1, PGP                                                                                                                                                                                                                                                                                                                                                   |

Table S4: Significantly enriched Reactome pathways for proteins ranked by log2(fold-change) in adults

| Pathway                                             | Adjusted p-value | Norm. Enrich. Score | # genes | Genes                                                                                                                                                                                                                                                                                                                                                                                                                                 |
|-----------------------------------------------------|------------------|---------------------|---------|---------------------------------------------------------------------------------------------------------------------------------------------------------------------------------------------------------------------------------------------------------------------------------------------------------------------------------------------------------------------------------------------------------------------------------------|
| Formation of the cornified envelope                 | 0.0000           | 2.3246              | 25      | CAPN1, CAPNS1, CASP14, DSC1, DSG1, DSP, FLG, JUP, KRT13, KRT14, KRT16, KRT17, KRT27, KRT5, KRT6A, KRT6B, KRT7, KRT71, KRT72, KRT77, KRT78, KRT80, PKP1, PKP4, TGM1                                                                                                                                                                                                                                                                    |
| Striated Muscle Contraction                         | 0.0049           | 1.9296              | 9       | ACTN2, MYH6, MYL2, MYL3, TMOD1, TMOD2, TPM3, TPM4, VIM                                                                                                                                                                                                                                                                                                                                                                                |
| Response of EIF2AK4 (GCN2) to amino acid deficiency | 0.0000           | 1.9125              | 61      | ASNS, EIF2AK4, EIF2S1, EIF2S2, EIF2S3, FAU, GCN1, RPL10, RPL10A, RPL12, RPL13, RPL13A, RPL14, RPL15, RPL19, RPL21, RPL23, RPL23A, RPL24, RPL26, RPL27, RPL28, RPL3, RPL30, RPL34, RPL35, RPL35A, RPL36, RPL36AL, RPL37A, RPL38, RPL4, RPL6, RPL7, RPL7A, RPL8, RPL9, RPLP0, RPLP2, RPS10, RPS11, RPS12, RPS13, RPS16, RPS18, RPS19, RPS2, RPS20, RPS21, RPS23, RPS25, RPS26, RPS27, RPS28, RPS3, RPS3A, RPS4X, RPS6, RPS7, RPS8, RPSA |
| Peptide chain elongation                            | 0.0000           | 1.8765              | 57      | EEF1A1, EEF2, FAU, RPL10, RPL10A, RPL12, RPL13, RPL13A, RPL14, RPL15, RPL19, RPL21, RPL23, RPL23A, RPL24, RPL26, RPL27, RPL28, RPL3, RPL30, RPL34, RPL35, RPL35A, RPL36, RPL36AL, RPL37A, RPL38, RPL4, RPL6, RPL7, RPL7A, RPL8, RPL9, RPLP0, RPLP2, RPS10, RPS11, RPS12, RPS13, RPS16, RPS18, RPS19, RPS2, RPS20, RPS21, RPS23, RPS25, RPS26, RPS27, RPS28, RPS3, RPS3A, RPS4X, RPS6, RPS7, RPS8, RPSA                                |
| Selenocysteine synthesis                            | 0.0000           | 1.8676              | 56      | EEFSEC, FAU, RPL10, RPL10A, RPL12, RPL13, RPL13A, RPL14, RPL15, RPL19, RPL21, RPL23, RPL23A, RPL24, RPL26, RPL27, RPL28, RPL3, RPL30, RPL34, RPL35, RPL35A, RPL36, RPL36AL, RPL37A, RPL38, RPL4, RPL6, RPL7, RPL7A, RPL8, RPL9, RPLP0, RPLP2, RPS10, RPS11, RPS12, RPS13, RPS16, RPS18, RPS19, RPS2, RPS20, RPS21, RPS23, RPS25, RPS26, RPS27, RPS28, RPS3, RPS3A, RPS4X, RPS6, RPS7, RPS8, RPSA                                      |
| Eukaryotic Translation Termination                  | 0.0000           | 1.8663              | 59      | APEH, FAU, GSPT1, GSPT2, RPL10, RPL10A, RPL12, RPL13, RPL13A, RPL14, RPL15, RPL19, RPL21, RPL23, RPL23A, RPL24, RPL26, RPL27, RPL28, RPL3, RPL30, RPL34, RPL35, RPL35A, RPL36, RPL36AL, RPL37A, RPL38, RPL4, RPL6, RPL7, RPL7A, RPL8, RPL9, RPLP0, RPLP2, RPS10, RPS11, RPS12, RPS13, RPS16, RPS18, RPS19, RPS2, RPS20, RPS21, RPS23, RPS25, RPS26, RPS27, RPS28, RPS3, RPS3A, RPS4X, RPS6, RPS7, RPS8, RPSA, TRMT112                 |

Table S4: Significantly enriched Reactome pathways for proteins ranked by log2(fold-change) in adults (*continued*)

| Pathway                                                                      | Adjusted p-value | Norm. Enrich. Score | # genes | Genes                                                                                                                                                                                                                                                                                                                                                                                                                                                         |
|------------------------------------------------------------------------------|------------------|---------------------|---------|---------------------------------------------------------------------------------------------------------------------------------------------------------------------------------------------------------------------------------------------------------------------------------------------------------------------------------------------------------------------------------------------------------------------------------------------------------------|
| Viral mRNA Translation                                                       | 0.0000           | 1.8662              | 56      | DNAJC3, FAU, RPL10, RPL10A, RPL12, RPL13, RPL13A, RPL14, RPL15, RPL19, RPL21, RPL23, RPL23A, RPL24, RPL26, RPL27, RPL28, RPL3, RPL30, RPL34, RPL35, RPL35A, RPL36, RPL36AL, RPL37A, RPL38, RPL4, RPL6, RPL7, RPL7A, RPL8, RPL9, RPLP0, RPLP2, RPS10, RPS11, RPS12, RPS13, RPS16, RPS18, RPS19, RPS2, RPS20, RPS21, RPS23, RPS25, RPS26, RPS27, RPS28, RPS3, RPS3A, RPS4X, RPS6, RPS7, RPS8, RPSA                                                              |
| Common Pathway of Fibrin Clot Formation                                      | 0.0210           | 1.8545              | 5       | F13A1, FGA, FGB, PROS1, SERPINE2                                                                                                                                                                                                                                                                                                                                                                                                                              |
| Major pathway of rRNA processing in the nucleolus and cytosol                | 0.0000           | 1.8443              | 65      | CSNK1D, CSNK1E, DDX21, DIS3, EXOSC10, FAU, FBL, MTREX, NCL, NOP58, PELP1, RPL10, RPL10A, RPL12, RPL13, RPL13A, RPL14, RPL15, RPL19, RPL21, RPL23, RPL23A, RPL24, RPL26, RPL27, RPL28, RPL3, RPL30, RPL34, RPL35, RPL35A, RPL36, RPL36AL, RPL37A, RPL38, RPL4, RPL6, RPL7, RPL7A, RPL8, RPL9, RPLP0, RPLP2, RPS10, RPS11, RPS12, RPS13, RPS16, RPS18, RPS19, RPS2, RPS20, RPS21, RPS23, RPS25, RPS26, RPS27, RPS28, RPS3, RPS3A, RPS4X, RPS6, RPS7, RPS8, RPSA |
| Formation of the ternary complex, and subsequently, the 43S complex          | 0.0005           | 1.8438              | 37      | EIF1AX, EIF2S1, EIF2S2, EIF2S3, EIF3A, EIF3B, EIF3D, EIF3E, EIF3F, EIF3I, EIF3J, EIF3K, EIF3L, EIF3M, FAU, RPS10, RPS11, RPS12, RPS13, RPS16, RPS18, RPS19, RPS2, RPS20, RPS21, RPS23, RPS25, RPS26, RPS27, RPS28, RPS3, RPS3A, RPS4X, RPS6, RPS7, RPS8, RPSA                                                                                                                                                                                                 |
| Nonsense Mediated Decay (NMD) independent of the Exon Junction Complex (EJC) | 0.0000           | 1.8327              | 59      | FAU, GSPT1, GSPT2, NCBP1, RPL10, RPL10A, RPL12, RPL13, RPL13A, RPL14, RPL15, RPL19, RPL21, RPL23, RPL23A, RPL24, RPL26, RPL27, RPL28, RPL3, RPL30, RPL34, RPL35, RPL35A, RPL36, RPL36AL, RPL37A, RPL38, RPL4, RPL6, RPL7, RPL7A, RPL8, RPL9, RPLP0, RPLP2, RPS10, RPS11, RPS12, RPS13, RPS16, RPS18, RPS19, RPS2, RPS20, RPS21, RPS23, RPS25, RPS26, RPS27, RPS28, RPS3, RPS3A, RPS4X, RPS6, RPS7, RPS8, RPSA, UPF1                                           |

Table S4: Significantly enriched Reactome pathways for proteins ranked by log<sub>2</sub>(fold-change) in adults (*continued*)

| Pathway                                                           | Adjusted p-value | Norm. Enrich. Score | # genes | Genes                                                                                                                                                                                                                                                                                                                                                                                                                                                                                                                              |
|-------------------------------------------------------------------|------------------|---------------------|---------|------------------------------------------------------------------------------------------------------------------------------------------------------------------------------------------------------------------------------------------------------------------------------------------------------------------------------------------------------------------------------------------------------------------------------------------------------------------------------------------------------------------------------------|
| L13a-mediated translational silencing of Ceruloplasmin expression | 0.0000           | 1.8244              | 72      | EIF1AX, EIF2S1, EIF2S2, EIF2S3, EIF3A, EIF3B, EIF3D, EIF3E, EIF3F, EIF3I, EIF3J, EIF3K, EIF3L, EIF3M, EIF4A1, EIF4A2, EIF4H, FAU, RPL10, RPL10A, RPL12, RPL13, RPL13A, RPL14, RPL15, RPL19, RPL21, RPL23, RPL23A, RPL24, RPL26, RPL27, RPL28, RPL3, RPL30, RPL34, RPL35, RPL35A, RPL36, RPL36AL, RPL37A, RPL38, RPL4, RPL6, RPL7, RPL7A, RPL8, RPL9, RPLP0, RPLP2, RPS10, RPS11, RPS12, RPS13, RPS16, RPS18, RPS19, RPS2, RPS20, RPS21, RPS23, RPS25, RPS26, RPS27, RPS28, RPS3, RPS3A, RPS4X, RPS6, RPS7, RPS8, RPSA              |
| Formation of a pool of free 40S subunits                          | 0.0000           | 1.8086              | 66      | EIF1AX, EIF3A, EIF3B, EIF3D, EIF3E, EIF3F, EIF3I, EIF3J, EIF3K, EIF3L, EIF3M, FAU, RPL10, RPL10A, RPL12, RPL13, RPL13A, RPL14, RPL15, RPL19, RPL21, RPL23, RPL23A, RPL24, RPL26, RPL27, RPL28, RPL3, RPL30, RPL34, RPL35, RPL35A, RPL36, RPL36AL, RPL37A, RPL38, RPL4, RPL6, RPL7, RPL7A, RPL8, RPL9, RPLP0, RPLP2, RPS10, RPS11, RPS12, RPS13, RPS16, RPS18, RPS19, RPS2, RPS20, RPS21, RPS23, RPS25, RPS26, RPS27, RPS28, RPS3, RPS3A, RPS4X, RPS6, RPS7, RPS8, RPSA                                                             |
| GTP hydrolysis and joining of the 60S ribosomal subunit           | 0.0000           | 1.8009              | 74      | EIF1AX, EIF2S1, EIF2S2, EIF2S3, EIF3A, EIF3B, EIF3D, EIF3E, EIF3F, EIF3I, EIF3J, EIF3K, EIF3L, EIF3M, EIF4A1, EIF4A2, EIF4H, EIF5, EIF5B, FAU, RPL10, RPL10A, RPL12, RPL13, RPL13A, RPL14, RPL15, RPL19, RPL21, RPL23, RPL23A, RPL24, RPL26, RPL27, RPL28, RPL3, RPL30, RPL34, RPL35, RPL35A, RPL36, RPL36AL, RPL37A, RPL38, RPL4, RPL6, RPL7, RPL7A, RPL8, RPL9, RPLP0, RPLP2, RPS10, RPS11, RPS12, RPS13, RPS16, RPS18, RPS19, RPS2, RPS20, RPS21, RPS23, RPS25, RPS26, RPS27, RPS28, RPS3, RPS3A, RPS4X, RPS6, RPS7, RPS8, RPSA |
| Translation initiation complex formation                          | 0.0046           | 1.7389              | 40      | EIF1AX, EIF2S1, EIF2S2, EIF2S3, EIF3A, EIF3B, EIF3D, EIF3E, EIF3F, EIF3I, EIF3J, EIF3K, EIF3L, EIF3M, EIF4A1, EIF4A2, EIF4H, FAU, RPS10, RPS11, RPS12, RPS13, RPS16, RPS18, RPS19, RPS2, RPS20, RPS21, RPS23, RPS25, RPS26, RPS27, RPS28, RPS3, RPS3A, RPS4X, RPS6, RPS7, RPS8, RPSA                                                                                                                                                                                                                                               |

Table S4: Significantly enriched Reactome pathways for proteins ranked by log2(fold-change) in adults (*continued*)

| Pathway                                                                      | Adjusted p-value | Norm. Enrich. Score | # genes | Genes                                                                                                                                                                                                                                                                                                                                                                                                                                                                                                                                     |
|------------------------------------------------------------------------------|------------------|---------------------|---------|-------------------------------------------------------------------------------------------------------------------------------------------------------------------------------------------------------------------------------------------------------------------------------------------------------------------------------------------------------------------------------------------------------------------------------------------------------------------------------------------------------------------------------------------|
| Ribosomal scanning and start codon recognition                               | 0.0039           | 1.7078              | 41      | EIF1AX, EIF2S1, EIF2S2, EIF2S3, EIF3A, EIF3B, EIF3D, EIF3E, EIF3F, EIF3I, EIF3J, EIF3K, EIF3L, EIF3M, EIF4A1, EIF4A2, EIF4H, EIF5, FAU, RPS10, RPS11, RPS12, RPS13, RPS16, RPS18, RPS19, RPS2, RPS20, RPS21, RPS23, RPS25, RPS26, RPS27, RPS28, RPS3, RPS3A, RPS4X, RPS6, RPS7, RPS8, RPSA                                                                                                                                                                                                                                                |
| SRP-dependent cotranslational protein targeting to membrane                  | 0.0007           | 1.7038              | 66      | DDOST, FAU, RPL10, RPL10A, RPL12, RPL13, RPL13A, RPL14, RPL15, RPL19, RPL21, RPL23, RPL23A, RPL24, RPL26, RPL27, RPL28, RPL3, RPL30, RPL34, RPL35, RPL35A, RPL36, RPL36AL, RPL37A, RPL38, RPL4, RPL6, RPL7, RPL7A, RPL8, RPL9, RPLP0, RPLP2, RPN1, RPN2, RPS10, RPS11, RPS12, RPS13, RPS16, RPS18, RPS19, RPS2, RPS20, RPS21, RPS23, RPS25, RPS26, RPS27, RPS28, RPS3, RPS3A, RPS4X, RPS6, RPS7, RPS8, RPSA, SRP14, SRP54, SRP68, SRP72, SRP9, SRPRA, SRPRB, SSR4                                                                         |
| 45 Nonsense Mediated Decay (NMD) enhanced by the Exon Junction Complex (EJC) | 0.0012           | 1.6942              | 69      | DCP1A, EIF4A3, FAU, GSPT1, GSPT2, MAGOH, NCBP1, PPP2R1A, PPP2R2A, RPL10, RPL10A, RPL12, RPL13, RPL13A, RPL14, RPL15, RPL19, RPL21, RPL23, RPL23A, RPL24, RPL26, RPL27, RPL28, RPL3, RPL30, RPL34, RPL35, RPL35A, RPL36, RPL36AL, RPL37A, RPL38, RPL4, RPL6, RPL7, RPL7A, RPL8, RPL9, RPLP0, RPLP2, RPS10, RPS11, RPS12, RPS13, RPS16, RPS18, RPS19, RPS2, RPS20, RPS21, RPS23, RPS25, RPS26, RPS27, RPS28, RPS3, RPS3A, RPS4X, RPS6, RPS7, RPS8, RPSA, SMG1, SMG5, SMG6, SMG8, UPF1, UPF2                                                 |
| mRNA Splicing - Major Pathway                                                | 0.0009           | 1.6543              | 71      | BCAS2, BUD31, CDC5L, CPSF3, CPSF7, CSTF2, DDX42, DHX15, DHX9, DNAJC8, EFTUD2, EIF4A3, ELAVL1, FIP1L1, FUS, HNRNPA0, HNRNPA2B1, HNRNPA3, HNRNPF, HNRNPH1, HNRNPH2, HNRNPK, HNRNPL, HNRNPR, HSPA8, LSM2, LSM3, LSM6, MAGOH, MTREX, NCBP1, NUDT21, PCBP1, PCBP2, PHF5A, PLRG1, POLR2A, POLR2J, PPIL1, PPIL3, PRPF19, PRPF6, PRPF8, RBM22, RBMX, SF1, SF3A1, SF3A3, SF3B1, SF3B2, SF3B3, SF3B5, SNRNP200, SNRNP70, SNRPA, SNRPA1, SNRPB, SNRPB2, SNRPD1, SNRPD2, SNRPD3, SRSF10, SRSF3, SRSF6, SRSF7, SRSF9, TRA2B, U2AF1, U2AF2, WBP11, XAB2 |

Table S4: Significantly enriched Reactome pathways for proteins ranked by log<sub>2</sub>(fold-change) in adults (*continued*)

| Pathway                                     | Adjusted p-value | Norm. Enrich. Score | # genes | Genes                                                                                                                                                                                                                                                                                                                                                                                                                                                                                                                                                                                                                                                                                                  |
|---------------------------------------------|------------------|---------------------|---------|--------------------------------------------------------------------------------------------------------------------------------------------------------------------------------------------------------------------------------------------------------------------------------------------------------------------------------------------------------------------------------------------------------------------------------------------------------------------------------------------------------------------------------------------------------------------------------------------------------------------------------------------------------------------------------------------------------|
| Regulation of expression of SLITs and ROBOs | 0.0005           | 1.6232              | 98      | CUL2, EIF4A3, ELOB, ELOC, FAU, GSPT1, GSPT2, MAGOH, NCBP1, PSMA1, PSMA2, PSMA3, PSMA4, PSMA5, PSMA6, PSMA7, PSMB1, PSMB2, PSMB3, PSMB4, PSMB5, PSMB6, PSMB7, PSMC1, PSMC2, PSMC3, PSMC4, PSMC5, PSMD1, PSMD11, PSMD12, PSMD13, PSMD14, PSMD2, PSMD3, PSMD4, PSMD5, PSMD6, PSMD7, PSMD8, PSME1, RPL10, RPL10A, RPL12, RPL13, RPL13A, RPL14, RPL15, RPL19, RPL21, RPL23, RPL23A, RPL24, RPL26, RPL27, RPL28, RPL3, RPL30, RPL34, RPL35, RPL35A, RPL36, RPL36AL, RPL37A, RPL38, RPL4, RPL6, RPL7, RPL7A, RPL8, RPL9, RPLP0, RPLP2, RPS10, RPS11, RPS12, RPS13, RPS16, RPS18, RPS19, RPS2, RPS20, RPS21, RPS23, RPS25, RPS26, RPS27, RPS28, RPS3, RPS3A, RPS4X, RPS6, RPS7, RPS8, RPSA, SLIT1, UPF2, USP33 |
| Activation of Matrix Metalloproteinases     | 0.0138           | -1.9916             | 4       | COL18A1, ELANE, MMP9, PLG                                                                                                                                                                                                                                                                                                                                                                                                                                                                                                                                                                                                                                                                              |
| Collagen chain trimerization                | 0.0123           | -2.2167             | 8       | COL11A1, COL12A1, COL14A1, COL18A1, COL1A1, COL4A2, COL6A2, COL6A3                                                                                                                                                                                                                                                                                                                                                                                                                                                                                                                                                                                                                                     |
| Regulation of Complement cascade            | 0.0002           | -2.6783             | 11      | C1QC, C3, C4BPA, C4BPB, CFH, CLU, ELANE, IGHG1, IGKC, IGLC2, PROS1                                                                                                                                                                                                                                                                                                                                                                                                                                                                                                                                                                                                                                     |

Table S5: Significantly enriched WikiPathways for proteins ranked by log2(fold-change) in children

| Pathway                                                 | Adjusted p-value | Norm. Enrich. Score | # genes | Genes                                                                                                                                                                                                                                                                                                                                                                                                                                                      |
|---------------------------------------------------------|------------------|---------------------|---------|------------------------------------------------------------------------------------------------------------------------------------------------------------------------------------------------------------------------------------------------------------------------------------------------------------------------------------------------------------------------------------------------------------------------------------------------------------|
| Disruption of postsynaptic signaling by CNV             | 0.0066           | 1.8221              | 28      | ARC, CAMK2A, CAMK2B, CAMK2D, CYFIP1, DLG1, DLG2, DLGAP1, FMR1, GRIN1, GRIN2A, GRIN2B, GRM1, HOMER1, MAPK1, MAPK3, NLGN2, NLGN3, NLGN4X, NRXN1, NRXN2, NRXN2, NRXN3, RPH3A, RYR2, SHANK1, STX1A, YWHAG                                                                                                                                                                                                                                                      |
| Oxidative phosphorylation                               | 0.0146           | 1.7258              | 33      | ATP5F1A, ATP5F1B, ATP5F1D, ATP5ME, ATP5PB, ATP5PD, ATP5PF, ATP5PO, ATP6AP1, DMAC2L, NDUFA10, NDUFA2, NDUFA3, NDUFA4, NDUFA5, NDUFA6, NDUFA7, NDUFA8, NDUFA9, NDUFAB1, NDUFB1, NDUFB4, NDUFB6, NDUFB7, NDUFB8, NDUFC2, NDUFS1, NDUFS2, NDUFS3, NDUFS4, NDUFS5, NDUFS6, NDUFS8                                                                                                                                                                               |
| Cytoplasmic ribosomal proteins                          | 0.0066           | 1.6689              | 55      | MRPL19, RPL10A, RPL12, RPL13, RPL13A, RPL14, RPL19, RPL21, RPL23, RPL23A, RPL24, RPL27, RPL28, RPL3, RPL30, RPL34, RPL35, RPL35A, RPL36, RPL36A, RPL37A, RPL38, RPL4, RPL6, RPL7, RPL7A, RPL8, RPL9, RPLP0, RPLP2, RPS10, RPS11, RPS12, RPS13, RPS16, RPS18, RPS19, RPS2, RPS20, RPS21, RPS23, RPS24, RPS25, RPS28, RPS3, RPS3A, RPS4X, RPS6, RPS6KA1, RPS6KA3, RPS6KB1, RPS7, RPS8, RPS9, RPSA                                                            |
| Electron transport chain: OXPHOS system in mitochondria | 0.0212           | 1.5995              | 55      | ATP5F1A, ATP5F1B, ATP5F1C, ATP5F1D, ATP5IF1, ATP5ME, ATP5PB, ATP5PD, ATP5PF, ATP5PO, COX4I1, COX5A, COX5B, COX6B1, COX6C, COX7A2, COX7A2L, COX7C, DMAC2L, MT-CO2, NDUFA10, NDUFA12, NDUFA2, NDUFA3, NDUFA4, NDUFA5, NDUFA6, NDUFA7, NDUFA8, NDUFA9, NDUFAB1, NDUFB1, NDUFB3, NDUFB4, NDUFB6, NDUFB7, NDUFB8, NDUFC2, NDUFS1, NDUFS2, NDUFS3, NDUFS4, NDUFS5, NDUFS6, NDUFS8, SDHA, SDHB, SLC25A4, SLC25A5, SLC25A6, UQCRCB, UQCRC1, UQCRC2, UQCRFS1, UQCRQ |
| Glutathione metabolism                                  | 0.0374           | -2.0714             | 6       | G6PD, GCLM, GSR, GSS, IDH1, OPLAH                                                                                                                                                                                                                                                                                                                                                                                                                          |
| Glycolysis in senescence                                | 0.0406           | -2.1152             | 6       | G6PD, GAPDH, LDHA, PGK1, PKM, PKM                                                                                                                                                                                                                                                                                                                                                                                                                          |

Table S6: Significantly enriched WikiPathways for proteins ranked by log2(fold-change) in adults

| Pathway                            | Adjusted p-value | Norm. Enrich. Score | # genes | Genes                                                                                                                                                                                                                                                                                                                                                                                                                                                       |
|------------------------------------|------------------|---------------------|---------|-------------------------------------------------------------------------------------------------------------------------------------------------------------------------------------------------------------------------------------------------------------------------------------------------------------------------------------------------------------------------------------------------------------------------------------------------------------|
| Cardiac progenitor differentiation | 0.0101           | 1.9537              | 9       | GSK3B, KIT, MEF2C, MYH6, MYL2, NCAM1, NCAM1, SIRPA, THY1                                                                                                                                                                                                                                                                                                                                                                                                    |
| Cytoplasmic ribosomal proteins     | 0.0002           | 1.7786              | 59      | MRPL19, RPL10, RPL10A, RPL12, RPL13, RPL13A, RPL14, RPL15, RPL19, RPL21, RPL23, RPL23A, RPL24, RPL26, RPL27, RPL28, RPL3, RPL30, RPL34, RPL35, RPL35A, RPL36, RPL37A, RPL38, RPL4, RPL6, RPL7, RPL7A, RPL8, RPL9, RPLP0, RPLP2, RPS10, RPS11, RPS12, RPS13, RPS16, RPS18, RPS19, RPS2, RPS20, RPS21, RPS23, RPS24, RPS25, RPS26, RPS27, RPS28, RPS3, RPS3A, RPS4X, RPS6, RPS6KA1, RPS6KA3, RPS6KB1, RPS7, RPS8, RPS9, RPSA                                  |
| mRNA processing                    | 0.0003           | 1.7768              | 61      | CELF1, CELF2, CELF4, CPSF3, CSTF2, DDX1, DDX20, DHX15, DHX9, DICER1, DNAJC8, EFTUD2, FUS, HNRNPA2B1, HNRNPH1, HNRNPH2, HNRNPK, HNRNPL, HNRNPR, LSM2, NCBP1, NONO, NUDT21, NXF1, PCBP2, PHF5A, POLR2A, PRPF4B, PRPF6, PRPF8, PTBP2, RBMX, SF3A1, SF3A3, SF3B1, SF3B2, SF3B3, SF3B5, SFPQ, SMC1A, SNRNP70, SNRPA, SNRPA1, SNRPB, SNRPB2, SNRPD1, SNRPD2, SNRPD3, SRP54, SRPK2, SRSF10, SRSF3, SRSF6, SRSF7, SRSF9, SUGP2, SUPT5H, TMED10, TRA2B, U2AF1, U2AF2 |
| Blood clotting cascade             | 0.0002           | -2.5175             | 6       | F8A1, FGA, FGB, FGG, PLG, VWF                                                                                                                                                                                                                                                                                                                                                                                                                               |



Table S7: Significantly enriched Reactome pathways for proteins ranked by VIP4p in children

| Pathway                                         | Adjusted p-value | Norm. Enrich. Score | # genes | Genes                                                                                                                                                                                                                                                                          |
|-------------------------------------------------|------------------|---------------------|---------|--------------------------------------------------------------------------------------------------------------------------------------------------------------------------------------------------------------------------------------------------------------------------------|
| Transferrin endocytosis and recycling           | 0.0000           | 2.4855              | 12      | ATP6AP1, ATP6V0A1, ATP6V0C, ATP6V1A, ATP6V1B2, ATP6V1C1, ATP6V1D, ATP6V1E1, ATP6V1F, ATP6V1G1, ATP6V1G2, ATP6V1H                                                                                                                                                               |
| Ion channel transport                           | 0.0000           | 2.4397              | 12      | ATP6AP1, ATP6V0A1, ATP6V0C, ATP6V1A, ATP6V1B2, ATP6V1C1, ATP6V1D, ATP6V1E1, ATP6V1F, ATP6V1G1, ATP6V1G2, ATP6V1H                                                                                                                                                               |
| ROS and RNS production in phagocytes            | 0.0000           | 2.4168              | 11      | ATP6V0A1, ATP6V0C, ATP6V1A, ATP6V1B2, ATP6V1C1, ATP6V1D, ATP6V1E1, ATP6V1F, ATP6V1G1, ATP6V1G2, ATP6V1H                                                                                                                                                                        |
| Insulin receptor recycling                      | 0.0000           | 2.3663              | 13      | ATP6AP1, ATP6V0A1, ATP6V0C, ATP6V1A, ATP6V1B2, ATP6V1C1, ATP6V1D, ATP6V1E1, ATP6V1F, ATP6V1G1, ATP6V1G2, ATP6V1H, INSR                                                                                                                                                         |
| Miscellaneous transport and binding events      | 0.0011           | 2.0849              | 9       | ADD1, ADD2, ADD3, AZGP1, DMTN, LRRC8A, LRRC8B, LRRC8D, PIP                                                                                                                                                                                                                     |
| Formation of the cornified envelope             | 0.0005           | 2.0022              | 26      | CAPN1, CAPNS1, CASP14, CSTA, DSC1, DSG1, DSP, FLG, JUP, KRT13, KRT14, KRT16, KRT17, KRT25, KRT27, KRT5, KRT6A, KRT6B, KRT7, KRT71, KRT77, KRT78, KRT80, PKP2, PKP4, TGM1                                                                                                       |
| Amino acids regulate mTORC1                     | 0.0037           | 1.9094              | 24      | ATP6V0C, ATP6V1A, ATP6V1B2, ATP6V1C1, ATP6V1D, ATP6V1E1, ATP6V1F, ATP6V1G1, ATP6V1G2, ATP6V1H, CASTOR2, FLCN, LAMTOR1, LAMTOR2, LAMTOR5, MIOS, MTOR, RHEB, RPTOR, RRAGA, RRAGC, SEH1L, SH3BP4, SZT2                                                                            |
| Mitochondrial translation elongation            | 0.0087           | 1.7260              | 36      | DAP3, GFM1, MRPL1, MRPL11, MRPL13, MRPL14, MRPL15, MRPL16, MRPL19, MRPL22, MRPL38, MRPL41, MRPL44, MRPL46, MRPL47, MRPL48, MRPL49, MRPL54, MRPL9, MRPS11, MRPS15, MRPS2, MRPS22, MRPS25, MRPS26, MRPS30, MRPS31, MRPS35, MRPS36, MRPS5, MRPS6, MRPS7, MRPS9, PTCD3, TSFM, TUFM |
| COPI-independent Golgi-to-ER retrograde traffic | 0.0238           | 1.7237              | 32      | ACTR10, ACTR1A, AGPAT3, BICD1, CAPZA1, CAPZA2, DCTN1, DCTN2, DCTN4, DCTN6, DYNC1H1, DYNC1I1, DYNC1I2, DYNC1LI1, DYNC1LI2, DYNLL1, DYNLL2, PAFAH1B1, PAFAH1B3, PLA2G6, RAB18, RAB3GAP1, RAB3GAP2, RAB6A, RAB6B, TUBA4A, TUBB2A, TUBB2B, TUBB3, TUBB4A, TUBB6, TUBB8             |
| Mitochondrial translation termination           | 0.0135           | 1.7105              | 35      | DAP3, GFM2, MRPL1, MRPL11, MRPL13, MRPL14, MRPL15, MRPL16, MRPL19, MRPL22, MRPL38, MRPL41, MRPL44, MRPL46, MRPL47, MRPL48, MRPL49, MRPL54, MRPL9, MRPS11, MRPS15, MRPS2, MRPS22, MRPS25, MRPS26, MRPS30, MRPS31, MRPS35, MRPS36, MRPS5, MRPS6, MRPS7, MRPS9, MRRF, PTCD3       |

Table S7: Significantly enriched Reactome pathways for proteins ranked by VIP4p in children (*continued*)

| Pathway                                                                      | Adjusted p-value | Norm. Enrich. Score | # genes | Genes                                                                                                                                                                                                                                                                                                                                                                              |
|------------------------------------------------------------------------------|------------------|---------------------|---------|------------------------------------------------------------------------------------------------------------------------------------------------------------------------------------------------------------------------------------------------------------------------------------------------------------------------------------------------------------------------------------|
| Mitochondrial translation initiation                                         | 0.0286           | 1.6920              | 35      | DAP3, MRPL1, MRPL11, MRPL13, MRPL14, MRPL15, MRPL16, MRPL19, MRPL22, MRPL38, MRPL41, MRPL44, MRPL46, MRPL47, MRPL48, MRPL49, MRPL54, MRPL9, MRPS11, MRPS15, MRPS2, MRPS22, MRPS25, MRPS26, MRPS30, MRPS31, MRPS35, MRPS36, MRPS5, MRPS6, MRPS7, MRPS9, MTIF2, MTIF3, PTC3                                                                                                          |
| RHOB GTPase cycle                                                            | 0.0393           | 1.6391              | 35      | ABR, ACTC1, ANLN, ARHGAP1, ARHGAP21, ARHGAP26, ARHGAP32, ARHGAP35, ARHGAP39, ARHGAP5, ARHGEF1, ARHGEF11, ARHGEF12, ARHGEF25, BCR, CAV1, CAVIN1, DAAM1, DIAPH1, FLOT1, FLOT2, JUP, MCF2L, MYO9A, OPHN1, PCDH7, PIK3R1, PIK3R2, PREX1, RHPN2, ROCK2, SLK, STOM, TJP2, VAV2                                                                                                           |
| Nonsense Mediated Decay (NMD) independent of the Exon Junction Complex (EJC) | 0.0496           | 1.5442              | 54      | GSPT1, GSPT2, NCBP1, NCBP2, RPL10A, RPL12, RPL13, RPL13A, RPL14, RPL19, RPL21, RPL23, RPL23A, RPL24, RPL27, RPL28, RPL3, RPL30, RPL34, RPL35, RPL35A, RPL36, RPL36AL, RPL37A, RPL38, RPL4, RPL6, RPL7, RPL7A, RPL8, RPL9, RPLP0, RPLP2, RPS10, RPS11, RPS12, RPS13, RPS16, RPS18, RPS19, RPS2, RPS20, RPS21, RPS23, RPS25, RPS28, RPS3, RPS3A, RPS4X, RPS6, RPS7, RPS8, RPSA, UPF1 |
| DNA methylation                                                              | 0.0499           | -1.9435             | 6       | H2AC20, H2AX, H2AZ2, H2BC21, H3-3A, H4-16                                                                                                                                                                                                                                                                                                                                          |
| B-WICH complex positively regulates rRNA expression                          | 0.0496           | -2.0590             | 8       | DDX21, H2AC20, H2AX, H2AZ2, H2BC21, H3-3A, H4-16, SF3B1                                                                                                                                                                                                                                                                                                                            |

Table S8: Significantly enriched Reactome pathways for proteins ranked by VIP4p in adults

| Pathway                                                                      | Adjusted p-value | Norm. Enrich. Score | # genes | Genes                                                                                                                                                                                                                                                                                                                                                                                                               |
|------------------------------------------------------------------------------|------------------|---------------------|---------|---------------------------------------------------------------------------------------------------------------------------------------------------------------------------------------------------------------------------------------------------------------------------------------------------------------------------------------------------------------------------------------------------------------------|
| Formation of the cornified envelope                                          | 0.0002           | 2.0357              | 25      | CAPN1, CAPNS1, CASP14, DSC1, DSG1, DSP, FLG, JUP, KRT13, KRT14, KRT16, KRT17, KRT27, KRT5, KRT6A, KRT6B, KRT7, KRT71, KRT72, KRT77, KRT78, KRT80, PKP1, PKP4, TGM1                                                                                                                                                                                                                                                  |
| Ion channel transport                                                        | 0.0112           | 1.9531              | 11      | ATP6AP1, ATP6V0A1, ATP6V1A, ATP6V1B2, ATP6V1C1, ATP6V1D, ATP6V1E1, ATP6V1F, ATP6V1G1, ATP6V1G2, ATP6V1H                                                                                                                                                                                                                                                                                                             |
| Selenocysteine synthesis                                                     | 0.0000           | 1.9335              | 56      | EEFSEC, FAU, RPL10, RPL10A, RPL12, RPL13, RPL13A, RPL14, RPL15, RPL19, RPL21, RPL23, RPL23A, RPL24, RPL26, RPL27, RPL28, RPL3, RPL30, RPL34, RPL35, RPL35A, RPL36, RPL36AL, RPL37A, RPL38, RPL4, RPL6, RPL7, RPL7A, RPL8, RPL9, RPLP0, RPLP2, RPS10, RPS11, RPS12, RPS13, RPS16, RPS18, RPS19, RPS2, RPS20, RPS21, RPS23, RPS25, RPS26, RPS27, RPS28, RPS3, RPS3A, RPS4X, RPS6, RPS7, RPS8, RPSA                    |
| Viral mRNA Translation                                                       | 0.0000           | 1.9087              | 56      | DNAJC3, FAU, RPL10, RPL10A, RPL12, RPL13, RPL13A, RPL14, RPL15, RPL19, RPL21, RPL23, RPL23A, RPL24, RPL26, RPL27, RPL28, RPL3, RPL30, RPL34, RPL35, RPL35A, RPL36, RPL36AL, RPL37A, RPL38, RPL4, RPL6, RPL7, RPL7A, RPL8, RPL9, RPLP0, RPLP2, RPS10, RPS11, RPS12, RPS13, RPS16, RPS18, RPS19, RPS2, RPS20, RPS21, RPS23, RPS25, RPS26, RPS27, RPS28, RPS3, RPS3A, RPS4X, RPS6, RPS7, RPS8, RPSA                    |
| Peptide chain elongation                                                     | 0.0000           | 1.9071              | 57      | EEF1A1, EEF2, FAU, RPL10, RPL10A, RPL12, RPL13, RPL13A, RPL14, RPL15, RPL19, RPL21, RPL23, RPL23A, RPL24, RPL26, RPL27, RPL28, RPL3, RPL30, RPL34, RPL35, RPL35A, RPL36, RPL36AL, RPL37A, RPL38, RPL4, RPL6, RPL7, RPL7A, RPL8, RPL9, RPLP0, RPLP2, RPS10, RPS11, RPS12, RPS13, RPS16, RPS18, RPS19, RPS2, RPS20, RPS21, RPS23, RPS25, RPS26, RPS27, RPS28, RPS3, RPS3A, RPS4X, RPS6, RPS7, RPS8, RPSA              |
| Nonsense Mediated Decay (NMD) independent of the Exon Junction Complex (EJC) | 0.0000           | 1.8956              | 59      | FAU, GSPT1, GSPT2, NCBP1, RPL10, RPL10A, RPL12, RPL13, RPL13A, RPL14, RPL15, RPL19, RPL21, RPL23, RPL23A, RPL24, RPL26, RPL27, RPL28, RPL3, RPL30, RPL34, RPL35, RPL35A, RPL36, RPL36AL, RPL37A, RPL38, RPL4, RPL6, RPL7, RPL7A, RPL8, RPL9, RPLP0, RPLP2, RPS10, RPS11, RPS12, RPS13, RPS16, RPS18, RPS19, RPS2, RPS20, RPS21, RPS23, RPS25, RPS26, RPS27, RPS28, RPS3, RPS3A, RPS4X, RPS6, RPS7, RPS8, RPSA, UPF1 |

Table S8: Significantly enriched Reactome pathways for proteins ranked by VIP4p in adults (*continued*)

| Pathway                                                       | Adjusted p-value | Norm. Enrich. Score | # genes | Genes                                                                                                                                                                                                                                                                                                                                                                                                                                                         |
|---------------------------------------------------------------|------------------|---------------------|---------|---------------------------------------------------------------------------------------------------------------------------------------------------------------------------------------------------------------------------------------------------------------------------------------------------------------------------------------------------------------------------------------------------------------------------------------------------------------|
| Response of EIF2AK4 (GCN2) to amino acid deficiency           | 0.0000           | 1.8864              | 61      | ASNS, EIF2AK4, EIF2S1, EIF2S2, EIF2S3, FAU, GCN1, RPL10, RPL10A, RPL12, RPL13, RPL13A, RPL14, RPL15, RPL19, RPL21, RPL23, RPL23A, RPL24, RPL26, RPL27, RPL28, RPL3, RPL30, RPL34, RPL35, RPL35A, RPL36, RPL36AL, RPL37A, RPL38, RPL4, RPL6, RPL7, RPL7A, RPL8, RPL9, RPLP0, RPLP2, RPS10, RPS11, RPS12, RPS13, RPS16, RPS18, RPS19, RPS2, RPS20, RPS21, RPS23, RPS25, RPS26, RPS27, RPS28, RPS3, RPS3A, RPS4X, RPS6, RPS7, RPS8, RPSA                         |
| Cytosolic tRNA aminoacylation                                 | 0.0060           | 1.8757              | 19      | AARS1, AIMP1, AIMP2, DARS1, EEF1E1, EPRS1, FARSB, GARS1, IARS1, KARS1, LARS1, MARS1, NARS1, QARS1, RARS1, TARS1, VARS1, WARS1, YARS1                                                                                                                                                                                                                                                                                                                          |
| Eukaryotic Translation Termination                            | 0.0000           | 1.8733              | 59      | APEH, FAU, GSPT1, GSPT2, RPL10, RPL10A, RPL12, RPL13, RPL13A, RPL14, RPL15, RPL19, RPL21, RPL23, RPL23A, RPL24, RPL26, RPL27, RPL28, RPL3, RPL30, RPL34, RPL35, RPL35A, RPL36, RPL36AL, RPL37A, RPL38, RPL4, RPL6, RPL7, RPL7A, RPL8, RPL9, RPLP0, RPLP2, RPS10, RPS11, RPS12, RPS13, RPS16, RPS18, RPS19, RPS2, RPS20, RPS21, RPS23, RPS25, RPS26, RPS27, RPS28, RPS3, RPS3A, RPS4X, RPS6, RPS7, RPS8, RPSA, TRMT112                                         |
| PI5P Regulates TP53 Acetylation                               | 0.0352           | 1.8691              | 5       | MAP2K6, PIN1, PIP4K2A, PIP4K2B, PIP4K2C                                                                                                                                                                                                                                                                                                                                                                                                                       |
| Selenoamino acid metabolism                                   | 0.0228           | 1.8584              | 11      | AIMP1, AIMP2, DARS1, EEF1E1, EPRS1, IARS1, KARS1, LARS1, MARS1, QARS1, RARS1                                                                                                                                                                                                                                                                                                                                                                                  |
| Major pathway of rRNA processing in the nucleolus and cytosol | 0.0000           | 1.8295              | 65      | CSNK1D, CSNK1E, DDX21, DIS3, EXOSC10, FAU, FBL, MTREX, NCL, NOP58, PELP1, RPL10, RPL10A, RPL12, RPL13, RPL13A, RPL14, RPL15, RPL19, RPL21, RPL23, RPL23A, RPL24, RPL26, RPL27, RPL28, RPL3, RPL30, RPL34, RPL35, RPL35A, RPL36, RPL36AL, RPL37A, RPL38, RPL4, RPL6, RPL7, RPL7A, RPL8, RPL9, RPLP0, RPLP2, RPS10, RPS11, RPS12, RPS13, RPS16, RPS18, RPS19, RPS2, RPS20, RPS21, RPS23, RPS25, RPS26, RPS27, RPS28, RPS3, RPS3A, RPS4X, RPS6, RPS7, RPS8, RPSA |

Table S8: Significantly enriched Reactome pathways for proteins ranked by VIP4p in adults (*continued*)

| Pathway                                                           | Adjusted p-value | Norm. Enrich. Score | # genes | Genes                                                                                                                                                                                                                                                                                                                                                                                                                                                                                                                              |
|-------------------------------------------------------------------|------------------|---------------------|---------|------------------------------------------------------------------------------------------------------------------------------------------------------------------------------------------------------------------------------------------------------------------------------------------------------------------------------------------------------------------------------------------------------------------------------------------------------------------------------------------------------------------------------------|
| L13a-mediated translational silencing of Ceruloplasmin expression | 0.0000           | 1.8239              | 72      | EIF1AX, EIF2S1, EIF2S2, EIF2S3, EIF3A, EIF3B, EIF3D, EIF3E, EIF3F, EIF3I, EIF3J, EIF3K, EIF3L, EIF3M, EIF4A1, EIF4A2, EIF4H, FAU, RPL10, RPL10A, RPL12, RPL13, RPL13A, RPL14, RPL15, RPL19, RPL21, RPL23, RPL23A, RPL24, RPL26, RPL27, RPL28, RPL3, RPL30, RPL34, RPL35, RPL35A, RPL36, RPL36AL, RPL37A, RPL38, RPL4, RPL6, RPL7, RPL7A, RPL8, RPL9, RPLP0, RPLP2, RPS10, RPS11, RPS12, RPS13, RPS16, RPS18, RPS19, RPS2, RPS20, RPS21, RPS23, RPS25, RPS26, RPS27, RPS28, RPS3, RPS3A, RPS4X, RPS6, RPS7, RPS8, RPSA              |
| Insulin receptor recycling                                        | 0.0351           | 1.8194              | 12      | ATP6AP1, ATP6V0A1, ATP6V1A, ATP6V1B2, ATP6V1C1, ATP6V1D, ATP6V1E1, ATP6V1F, ATP6V1G1, ATP6V1G2, ATP6V1H, INSR                                                                                                                                                                                                                                                                                                                                                                                                                      |
| Formation of a pool of free 40S subunits                          | 0.0000           | 1.8180              | 66      | EIF1AX, EIF3A, EIF3B, EIF3D, EIF3E, EIF3F, EIF3I, EIF3J, EIF3K, EIF3L, EIF3M, FAU, RPL10, RPL10A, RPL12, RPL13, RPL13A, RPL14, RPL15, RPL19, RPL21, RPL23, RPL23A, RPL24, RPL26, RPL27, RPL28, RPL3, RPL30, RPL34, RPL35, RPL35A, RPL36, RPL36AL, RPL37A, RPL38, RPL4, RPL6, RPL7, RPL7A, RPL8, RPL9, RPLP0, RPLP2, RPS10, RPS11, RPS12, RPS13, RPS16, RPS18, RPS19, RPS2, RPS20, RPS21, RPS23, RPS25, RPS26, RPS27, RPS28, RPS3, RPS3A, RPS4X, RPS6, RPS7, RPS8, RPSA                                                             |
| GTP hydrolysis and joining of the 60S ribosomal subunit           | 0.0000           | 1.8177              | 74      | EIF1AX, EIF2S1, EIF2S2, EIF2S3, EIF3A, EIF3B, EIF3D, EIF3E, EIF3F, EIF3I, EIF3J, EIF3K, EIF3L, EIF3M, EIF4A1, EIF4A2, EIF4H, EIF5, EIF5B, FAU, RPL10, RPL10A, RPL12, RPL13, RPL13A, RPL14, RPL15, RPL19, RPL21, RPL23, RPL23A, RPL24, RPL26, RPL27, RPL28, RPL3, RPL30, RPL34, RPL35, RPL35A, RPL36, RPL36AL, RPL37A, RPL38, RPL4, RPL6, RPL7, RPL7A, RPL8, RPL9, RPLP0, RPLP2, RPS10, RPS11, RPS12, RPS13, RPS16, RPS18, RPS19, RPS2, RPS20, RPS21, RPS23, RPS25, RPS26, RPS27, RPS28, RPS3, RPS3A, RPS4X, RPS6, RPS7, RPS8, RPSA |

Table S8: Significantly enriched Reactome pathways for proteins ranked by VIP4p in adults (*continued*)

| Pathway                                                                   | Adjusted p-value | Norm. Enrich. Score | # genes | Genes                                                                                                                                                                                                                                                                                                                                                                                                                                                                                                                                                                                                                                                                                                  |
|---------------------------------------------------------------------------|------------------|---------------------|---------|--------------------------------------------------------------------------------------------------------------------------------------------------------------------------------------------------------------------------------------------------------------------------------------------------------------------------------------------------------------------------------------------------------------------------------------------------------------------------------------------------------------------------------------------------------------------------------------------------------------------------------------------------------------------------------------------------------|
| Regulation of expression of SLITs and ROBOs                               | 0.0000           | 1.8142              | 98      | CUL2, EIF4A3, ELOB, ELOC, FAU, GSPT1, GSPT2, MAGOH, NCBP1, PSMA1, PSMA2, PSMA3, PSMA4, PSMA5, PSMA6, PSMA7, PSMB1, PSMB2, PSMB3, PSMB4, PSMB5, PSMB6, PSMB7, PSMC1, PSMC2, PSMC3, PSMC4, PSMC5, PSMD1, PSMD11, PSMD12, PSMD13, PSMD14, PSMD2, PSMD3, PSMD4, PSMD5, PSMD6, PSMD7, PSMD8, PSME1, RPL10, RPL10A, RPL12, RPL13, RPL13A, RPL14, RPL15, RPL19, RPL21, RPL23, RPL23A, RPL24, RPL26, RPL27, RPL28, RPL3, RPL30, RPL34, RPL35, RPL35A, RPL36, RPL36AL, RPL37A, RPL38, RPL4, RPL6, RPL7, RPL7A, RPL8, RPL9, RPLP0, RPLP2, RPS10, RPS11, RPS12, RPS13, RPS16, RPS18, RPS19, RPS2, RPS20, RPS21, RPS23, RPS25, RPS26, RPS27, RPS28, RPS3, RPS3A, RPS4X, RPS6, RPS7, RPS8, RPSA, SLIT1, UPF2, USP33 |
| Nonsense Mediated Decay (NMD) enhanced by the Exon Junction Complex (EJC) | 0.0000           | 1.8062              | 69      | DCP1A, EIF4A3, FAU, GSPT1, GSPT2, MAGOH, NCBP1, PPP2R1A, PPP2R2A, RPL10, RPL10A, RPL12, RPL13, RPL13A, RPL14, RPL15, RPL19, RPL21, RPL23, RPL23A, RPL24, RPL26, RPL27, RPL28, RPL3, RPL30, RPL34, RPL35, RPL35A, RPL36, RPL36AL, RPL37A, RPL38, RPL4, RPL6, RPL7, RPL7A, RPL8, RPL9, RPLP0, RPLP2, RPS10, RPS11, RPS12, RPS13, RPS16, RPS18, RPS19, RPS2, RPS20, RPS21, RPS23, RPS25, RPS26, RPS27, RPS28, RPS3, RPS3A, RPS4X, RPS6, RPS7, RPS8, RPSA, SMG1, SMG5, SMG6, SMG8, UPF1, UPF2                                                                                                                                                                                                              |
| Transferrin endocytosis and recycling                                     | 0.0469           | 1.8018              | 12      | ATP6AP1, ATP6V0A1, ATP6V1A, ATP6V1B2, ATP6V1C1, ATP6V1D, ATP6V1E1, ATP6V1F, ATP6V1G1, ATP6V1G2, ATP6V1H, TFRC                                                                                                                                                                                                                                                                                                                                                                                                                                                                                                                                                                                          |
| Complex I biogenesis                                                      | 0.0037           | 1.7753              | 34      | ACAD9, ECSIT, MT-ND5, NDUFA10, NDUFA11, NDUFA12, NDUFA13, NDUFA2, NDUFA5, NDUFA7, NDUFA8, NDUFA9, NDUFAB1, NDUFAF2, NDUFAF3, NDUFAF4, NDUFAF6, NDUFB1, NDUFB10, NDUFB3, NDUFB4, NDUFB5, NDUFB6, NDUFB7, NDUFB9, NDUFC2, NDUFS1, NDUFS2, NDUFS3, NDUFS4, NDUFS5, NDUFS6, NDUFS8, NUBPL                                                                                                                                                                                                                                                                                                                                                                                                                  |

Table S8: Significantly enriched Reactome pathways for proteins ranked by VIP4p in adults (*continued*)

| Pathway                                                             | Adjusted p-value | Norm. Enrich. Score | # genes | Genes                                                                                                                                                                                                                                                                                                                                                                                                                                                                                                                                     |
|---------------------------------------------------------------------|------------------|---------------------|---------|-------------------------------------------------------------------------------------------------------------------------------------------------------------------------------------------------------------------------------------------------------------------------------------------------------------------------------------------------------------------------------------------------------------------------------------------------------------------------------------------------------------------------------------------|
| SRP-dependent cotranslational protein targeting to membrane         | 0.0002           | 1.7439              | 66      | DDOST, FAU, RPL10, RPL10A, RPL12, RPL13, RPL13A, RPL14, RPL15, RPL19, RPL21, RPL23, RPL23A, RPL24, RPL26, RPL27, RPL28, RPL3, RPL30, RPL34, RPL35, RPL35A, RPL36, RPL36AL, RPL37A, RPL38, RPL4, RPL6, RPL7, RPL7A, RPL8, RPL9, RPLP0, RPLP2, RPN1, RPN2, RPS10, RPS11, RPS12, RPS13, RPS16, RPS18, RPS19, RPS2, RPS20, RPS21, RPS23, RPS25, RPS26, RPS27, RPS28, RPS3, RPS3A, RPS4X, RPS6, RPS7, RPS8, RPSA, SRP14, SRP54, SRP68, SRP72, SRP9, SRPRA, SRPRB, SSR4                                                                         |
| Formation of the ternary complex, and subsequently, the 43S complex | 0.0046           | 1.7347              | 37      | EIF1AX, EIF2S1, EIF2S2, EIF2S3, EIF3A, EIF3B, EIF3D, EIF3E, EIF3F, EIF3I, EIF3J, EIF3K, EIF3L, EIF3M, FAU, RPS10, RPS11, RPS12, RPS13, RPS16, RPS18, RPS19, RPS2, RPS20, RPS21, RPS23, RPS25, RPS26, RPS27, RPS28, RPS3, RPS3A, RPS4X, RPS6, RPS7, RPS8, RPSA                                                                                                                                                                                                                                                                             |
| 55 Translation initiation complex formation                         | 0.0058           | 1.7191              | 40      | EIF1AX, EIF2S1, EIF2S2, EIF2S3, EIF3A, EIF3B, EIF3D, EIF3E, EIF3F, EIF3I, EIF3J, EIF3K, EIF3L, EIF3M, EIF4A1, EIF4A2, EIF4H, FAU, RPS10, RPS11, RPS12, RPS13, RPS16, RPS18, RPS19, RPS2, RPS20, RPS21, RPS23, RPS25, RPS26, RPS27, RPS28, RPS3, RPS3A, RPS4X, RPS6, RPS7, RPS8, RPSA                                                                                                                                                                                                                                                      |
| Ribosomal scanning and start codon recognition                      | 0.0046           | 1.6918              | 41      | EIF1AX, EIF2S1, EIF2S2, EIF2S3, EIF3A, EIF3B, EIF3D, EIF3E, EIF3F, EIF3I, EIF3J, EIF3K, EIF3L, EIF3M, EIF4A1, EIF4A2, EIF4H, EIF5, FAU, RPS10, RPS11, RPS12, RPS13, RPS16, RPS18, RPS19, RPS2, RPS20, RPS21, RPS23, RPS25, RPS26, RPS27, RPS28, RPS3, RPS3A, RPS4X, RPS6, RPS7, RPS8, RPSA                                                                                                                                                                                                                                                |
| mRNA Splicing - Major Pathway                                       | 0.0020           | 1.6449              | 71      | BCAS2, BUD31, CDC5L, CPSF3, CPSF7, CSTF2, DDX42, DHX15, DHX9, DNAJC8, EFTUD2, EIF4A3, ELAVL1, FIP1L1, FUS, HNRNPA0, HNRNPA2B1, HNRNPA3, HNRNPF, HNRNPH1, HNRNPH2, HNRNPK, HNRNPL, HNRNPR, HSPA8, LSM2, LSM3, LSM6, MAGOH, MTREX, NCBP1, NUDT21, PCBP1, PCBP2, PHF5A, PLRG1, POLR2A, POLR2J, PPIL1, PPIL3, PRPF19, PRPF6, PRPF8, RBM22, RBMX, SF1, SF3A1, SF3A3, SF3B1, SF3B2, SF3B3, SF3B5, SNRNP200, SNRNP70, SNRPA, SNRPA1, SNRPB, SNRPB2, SNRPD1, SNRPD2, SNRPD3, SRSF10, SRSF3, SRSF6, SRSF7, SRSF9, TRA2B, U2AF1, U2AF2, WBP11, XAB2 |

Table S8: Significantly enriched Reactome pathways for proteins ranked by VIP4p in adults (*continued*)

| Pathway                                             | Adjusted p-value | Norm. Enrich. Score | # genes | Genes                                                                                                                                                                                                                                                                                              |
|-----------------------------------------------------|------------------|---------------------|---------|----------------------------------------------------------------------------------------------------------------------------------------------------------------------------------------------------------------------------------------------------------------------------------------------------|
| Cargo recognition for clathrin-mediated endocytosis | 0.0170           | 1.6138              | 42      | AAK1, AP2A1, AP2A2, AP2M1, APOB, ARRB1, CLTA, CLTB, COPS2, COPS3, COPS4, COPS5, COPS7A, EGFR, EPN1, EPS15, EPS15L1, GPS1, GRK2, GRK3, HGS, ITSN1, ITSN2, PICALM, REPS1, REPS2, SGIP1, SH3GL1, SH3GL2, SH3GL3, SH3KBP1, SNAP91, STAM, STAM2, STON2, SYT1, SYT11, TFRC, TOR1A, UBQLN1, UBQLN2, VAMP7 |



Table S9: Significantly enriched WikiPathways for proteins ranked by VIP4p in children

| Pathway                               | Adjusted p-value | Norm. Enrich. Score | # genes | Genes                                                                                                                                                                                                                                                                                                                                                                                                                                                                                                                                    |
|---------------------------------------|------------------|---------------------|---------|------------------------------------------------------------------------------------------------------------------------------------------------------------------------------------------------------------------------------------------------------------------------------------------------------------------------------------------------------------------------------------------------------------------------------------------------------------------------------------------------------------------------------------------|
| Proximal tubule transport             | 0.0035           | 1.9518              | 17      | ABCB1, ABCG2, ATP1A1, ATP1B1, ATP6V0C, ATP6V1A, ATP6V1C1, ATP6V1D, ATP6V1E1, ATP6V1F, ATP6V1G1, ATP6V1H, CA4, SLC20A2, SLC2A1, SLC3A2, SLC4A4                                                                                                                                                                                                                                                                                                                                                                                            |
| Pathogenic Escherichia coli infection | 0.0468           | 1.6529              | 29      | ABL1, ARPC1A, ARPC1B, ARPC2, ARPC3, ARPC4, ARPC5, ARPC5L, CDC42, CTTN, EZR, FYN, ITGB1, NCK1, NCK2, NCL, PRKCA, RHOA, ROCK2, TUBA4A, TUBB2A, TUBB2B, TUBB3, TUBB4A, TUBB6, TUBB8, WASL, YWHAQ, YWHAZ                                                                                                                                                                                                                                                                                                                                     |
| Nonalcoholic fatty liver disease      | 0.0345           | 1.5366              | 69      | AKT1, AKT2, AKT3, CDC42, COX4I1, COX5A, COX5B, COX6B1, COX6C, COX7A2, COX7A2L, COX7C, CYC1, EIF2S1, GSK3A, IKBKB, INSR, IRS1, IRS2, ITCH, MAP3K5, MAPK8, MAPK9, MT-CO2, NDUFA10, NDUFA12, NDUFA13, NDUFA2, NDUFA3, NDUFA4, NDUFA5, NDUFA6, NDUFA7, NDUFA8, NDUFA9, NDUFAB1, NDUFB1, NDUFB3, NDUFB4, NDUFB6, NDUFB7, NDUFB8, NDUFC2, NDUFS1, NDUFS2, NDUFS3, NDUFS4, NDUFS5, NDUFS6, NDUFS8, PIK3CA, PIK3CB, PIK3R1, PIK3R2, PRKAA1, PRKAA2, PRKAB2, PRKAG1, PRKAG2, RAC1, RELA, SDHA, SDHB, TRAF2, UQCRB, UQCRC1, UQCRC2, UQCRFS1, UQCRQ |

Table S10: Significantly enriched WikiPathways for proteins ranked by VIP4p in adults

| Pathway                        | Adjusted p-value | Norm. Enrich. Score | # genes | Genes                                                                                                                                                                                                                                                                                                                                                                                                                                                       |
|--------------------------------|------------------|---------------------|---------|-------------------------------------------------------------------------------------------------------------------------------------------------------------------------------------------------------------------------------------------------------------------------------------------------------------------------------------------------------------------------------------------------------------------------------------------------------------|
| Cytoplasmic ribosomal proteins | 0.0005           | 1.7328              | 59      | MRPL19, RPL10, RPL10A, RPL12, RPL13, RPL13A, RPL14, RPL15, RPL19, RPL21, RPL23, RPL23A, RPL24, RPL26, RPL27, RPL28, RPL3, RPL30, RPL34, RPL35, RPL35A, RPL36, RPL37A, RPL38, RPL4, RPL6, RPL7, RPL7A, RPL8, RPL9, RPLP0, RPLP2, RPS10, RPS11, RPS12, RPS13, RPS16, RPS18, RPS19, RPS2, RPS20, RPS21, RPS23, RPS24, RPS25, RPS26, RPS27, RPS28, RPS3, RPS3A, RPS4X, RPS6, RPS6KA1, RPS6KA3, RPS6KB1, RPS7, RPS8, RPS9, RPSA                                  |
| Oxidative phosphorylation      | 0.0117           | 1.7186              | 36      | ATP5F1A, ATP5F1B, ATP5F1D, ATP5ME, ATP5PB, ATP5PD, ATP5PF, ATP5PO, ATP6AP1, DMAC2L, MT-ND5, NDUFA10, NDUFA11, NDUFA2, NDUFA4, NDUFA5, NDUFA6, NDUFA7, NDUFA8, NDUFA9, NDUFAB1, NDUFB1, NDUFB10, NDUFB4, NDUFB5, NDUFB6, NDUFB7, NDUFB9, NDUFC2, NDUFS1, NDUFS2, NDUFS3, NDUFS4, NDUFS5, NDUFS6, NDUFS8                                                                                                                                                      |
| mRNA processing                | 0.0046           | 1.6127              | 61      | CELF1, CELF2, CELF4, CPSF3, CSTF2, DDX1, DDX20, DHX15, DHX9, DICER1, DNAJC8, EFTUD2, FUS, HNRNPA2B1, HNRNPH1, HNRNPH2, HNRNPK, HNRNPL, HNRNPR, LSM2, NCBP1, NONO, NUDT21, NXF1, PCBP2, PHF5A, POLR2A, PRPF4B, PRPF6, PRPF8, PTBP2, RBMX, SF3A1, SF3A3, SF3B1, SF3B2, SF3B3, SF3B5, SFPQ, SMC1A, SNRNP70, SNRPA, SNRPA1, SNRPB, SNRPB2, SNRPD1, SNRPD2, SNRPD3, SRP54, SRPK2, SRSF10, SRSF3, SRSF6, SRSF7, SRSF9, SUGP2, SUPT5H, TMED10, TRA2B, U2AF1, U2AF2 |
